# Supplementary material for: Transformation of n -alkanes from plant to soil: a review
Source: Copernicus journal article supplement (doi:10.5194/soil-7-785-2021), 2021-11-25
Supplement: Supplementary file 1 [file supplementary_material_cthomas.xlsx]

## Sheet: Open_systems
Site information								Sample information					Soil information								Vegetation information		n-alkanes data						Index measurements						Individual chain length concentration
Study	Sample or series	Location	Latitude	Longitude	Altitude (m)	MAAT (deg C)	MAP (mm)	Sampling season	Depth (m) top	Depth (m) bottom	Horizon	Plant sample type	Soil type	Soil pH	%Sand	%Silt	%Clay	C/N	% Total C	Total OC %	Vegetation	Plant species	Extraction method	Total lipids %	Total concentration n-alkanes (ug g OC or C-1)	Total concentration n-alkanes (𝝻g g dry weight -1)	Cmax	Range of chain lengths	ACL	ACL equation	CPI	CPI equation	OEP	OEP equation	C20 (𝝻g g OC -1)	C21 (𝝻g g OC -1)	C22 (𝝻g g OC -1)	C23 (𝝻g g OC -1)	C24 (𝝻g g OC -1)	C25 (𝝻g g OC -1)	C26 (𝝻g g OC -1)	C27 (𝝻g g OC -1)	C28 (𝝻g g OC -1)	C29 (𝝻g g OC -1)	C30 (𝝻g g OC -1)	C31 (𝝻g g OC -1)	C32 (𝝻g g OC -1)	C33 (𝝻g g OC -1)	C15 (𝝻g g dry weight -1)
Almendros et al., 1996	P1	Castilla region, Spain	40.6838	-3.65465	710			April- June		0.1			Cambisol	5.4	83.2	11.3	5.6	29.73	9.99		Pinus pinea, Cistus ladanifer, Rosmarinus officinalis, Lavandula pedunculara, Thymus mastichina.		Soxhlet, petroleum ether	0.15			25	15-29
Almendros et al., 1996	P2	Castilla region, Spain	40.6826	-3.64459	765			April- June		0.1			Regosol	6.1	93.5	2.7	3.8	20	3.28		Pinus pinea, Lavandula pedunculata, Poaceae, Fabaceae		Soxhlet, petroleum ether	0.06			26	19-30
Almendros et al., 1996	P3	Castilla region, Spain	40.6842	-3.63987	835			April- June		0.1			Cambisol	6.2	91.3	3	5.8	25.6	9.83		Pinus pinea, Thymus zygis, Rosa canina, Cistus sp., Poaceae.		Soxhlet, petroleum ether	0.21			19	17-19
Almendros et al., 1996	P4	Castilla region, Spain	40.6974	-3.66875	675			April- June		0.1			Cambisol	7.4	64.7	33.3	2.1	24.96	11.13		Pinus pinea, Rhamnus lycioides, Reruma sphaerocarpa, Lavandula latifolia.		Soxhlet, petroleum ether	0.015			29	16-31
Almendros et al., 1996	Q1	Castilla region, Spain	40.6814	-3.65522	670			April- June		0.1			Cambisol	5.6	71.7	14.9	13.5	16.8	4.74		Quercus rotundifolia, Poaceae, Fabaceae		Soxhlet, petroleum ether	0.025			25	15-29
Almendros et al., 1996	Q2	Castilla region, Spain	40.6843	-3.64058	850			April- June		0.1			Cambisol	6.6	82.8	7	10.2	20.75	12.74		Quercus rotundifolia, Cisrus sp.		Soxhlet, petroleum ether	0.14			29	18-29
Almendros et al., 1996	Q3	Castilla region, Spain	40.6928	-3.6577	640			April- June		0.1			Cambisol	7.6	35.2	58.3	6.5	17.95	15.33		Quercus rotundifolia, Gypsophyla struthium.		Soxhlet, petroleum ether	0.035			29	17-31
Almendros et al., 1996	Q4	Castilla region, Spain	40.6925	-3.6461	1010			April- June		0.1			Cambisol	6.4	37.8	48.8	13.4	23.74	9.04		Quercus rotundifolia, Rosa canina, Lavandula pedunculata, Cistus ladanifer.		Soxhlet, petroleum ether	0.11			25	14-31
Almendros et al., 1996	J1	Castilla region, Spain	40.6885	-3.64665	1195			April- June		0.1			Cambisol	7	63.7	16.7	19.6	21.55	14.01		Juniperus thurifera, Erodium praecox, Curlina corymbosa, Taraxacum officinalis, Poaceae.		Soxhlet, petroleum ether	0.1			15	14-30
Almendros et al., 1996	J2	Castilla region, Spain	40.6888	-3.64713	1200			April- June		0.1			Leptosol	7.6	39.2	38.4	22.4	13.87	7.35		Juniperus thurifera, Salvia lavandulifolia		Soxhlet, petroleum ether	0.06			18	18-26
Almendros et al., 1996	J3	Castilla region, Spain	40.6922	-3.6461	1020			April- June		0.1			Cambisol	7.5	30	58	12	27.52	21.52		Juniperus thurifera, Thymus mastichina, Ononis spinosa, Lavandula sp., Cistus sp.		Soxhlet, petroleum ether	0.4			31	20-31
Almendros et al., 1996	J4	Castilla region, Spain	40.7017	-3.64607	1170			April- June		0.1			Cambisol	7.7	34.6	59	6.4	21.8	29.21		Juniperus thurifera, Poaceae.		Soxhlet, petroleum ether	0.062			23, 25	14-27
Almendros et al., 1996	P	Castilla region, Spain						April- June				Fresh material										Pinus pinea	Soxhlet, petroleum ether				25	15-31
Almendros et al., 1996	Q	Castilla region, Spain						April- June				Fresh material										Quercus rotundifolia	Soxhlet, petroleum ether				29	17-31
Almendros et al., 1996	J	Castilla region, Spain						April- June				Fresh material										Juniperus thurifera	Soxhlet, petroleum ether				31	21-33
Andersson and Meyers, 2012		Lek-Vorkuta region, Russia	67.4167	63.3667	160	-5.8	531	July-August	0	0.02											Vaccinium vitis-idaea, Ledum palustre		ASE, DCM:MeOH		282		31	19-33			11.4	((∑ odd C21–C31) + (∑ odd C23–C33))/2 * (∑even C22–C32)
Andersson and Meyers, 2012		Lek-Vorkuta region, Russia	67.4167	63.3667	160	-5.8	531	July-August	0.02	0.03											Vaccinium vitis-idaea, Ledum palustre		ASE, DCM:MeOH		799		29	19-33			9.7	((∑ odd C21–C31) + (∑ odd C23–C33))/2 * (∑even C22–C32)
Andersson and Meyers, 2012		Lek-Vorkuta region, Russia	67.4167	63.3667	160	-5.8	531	July-August	0.05	0.06											Vaccinium vitis-idaea, Ledum palustre		ASE, DCM:MeOH		111		31	19-33			11.6	((∑ odd C21–C31) + (∑ odd C23–C33))/2 * (∑even C22–C32)
Andersson and Meyers, 2012		Lek-Vorkuta region, Russia	67.4167	63.3667	160	-5.8	531	July-August	0.11	0.12											Vaccinium vitis-idaea, Ledum palustre		ASE, DCM:MeOH		133		25	19-33			18.2	((∑ odd C21–C31) + (∑ odd C23–C33))/2 * (∑even C22–C32)
Andersson and Meyers, 2012		Lek-Vorkuta region, Russia	67.4167	63.3667	160	-5.8	531	July-August	0.2	0.21											Vaccinium vitis-idaea, Ledum palustre		ASE, DCM:MeOH		261		31	19-33			18.7	((∑ odd C21–C31) + (∑ odd C23–C33))/2 * (∑even C22–C32)
Andersson and Meyers, 2012		Lek-Vorkuta region, Russia	67.4167	63.3667	160	-5.8	531	July-August	0.27	0.28											Vaccinium vitis-idaea, Ledum palustre		ASE, DCM:MeOH		143		27	19-33			11.8	((∑ odd C21–C31) + (∑ odd C23–C33))/2 * (∑even C22–C32)
Andersson and Meyers, 2012		Lek-Vorkuta region, Russia	67.4167	63.3667	160	-5.8	531	July-August	0.34	0.35											Vaccinium vitis-idaea, Ledum palustre		ASE, DCM:MeOH		135		31	19-33			9.8	((∑ odd C21–C31) + (∑ odd C23–C33))/2 * (∑even C22–C32)
Andersson and Meyers, 2012		Lek-Vorkuta region, Russia	67.4167	63.3667	160	-5.8	531	July-August	0.39	0.4											Vaccinium vitis-idaea, Ledum palustre		ASE, DCM:MeOH		165		27	19-33			9.8	((∑ odd C21–C31) + (∑ odd C23–C33))/2 * (∑even C22–C32)
Andersson and Meyers, 2012		Lek-Vorkuta region, Russia	67.4167	63.3667	160	-5.8	531	July-August	0.43	0.45											Vaccinium vitis-idaea, Ledum palustre		ASE, DCM:MeOH		81		27	19-33			8.1	((∑ odd C21–C31) + (∑ odd C23–C33))/2 * (∑even C22–C32)
Andersson and Meyers, 2012		Lek-Vorkuta region, Russia	67.4167	63.3667	160	-5.8	531	July-August	0.47	0.5											Vaccinium vitis-idaea, Ledum palustre		ASE, DCM:MeOH		256		27	19-33			9.1	((∑ odd C21–C31) + (∑ odd C23–C33))/2 * (∑even C22–C32)
Andersson and Meyers, 2012		Lek-Vorkuta region, Russia	67.4167	63.3667	160	-5.8	531	July-August	0.5	0.55											Vaccinium vitis-idaea, Ledum palustre		ASE, DCM:MeOH		122		27	19-33			6.6	((∑ odd C21–C31) + (∑ odd C23–C33))/2 * (∑even C22–C32)
Andersson and Meyers, 2012		Lek-Vorkuta region, Russia	67.4167	63.3667	160	-5.8	531	July-August	0.55	0.6											Vaccinium vitis-idaea, Ledum palustre		ASE, DCM:MeOH		127		27	19-33			5.5	((∑ odd C21–C31) + (∑ odd C23–C33))/2 * (∑even C22–C32)
Andersson and Meyers, 2012		Lek-Vorkuta region, Russia	67.4167	63.3667	160	-5.8	531	July-August	0.65	0.7											Vaccinium vitis-idaea, Ledum palustre		ASE, DCM:MeOH		124		27	19-33			7.1	((∑ odd C21–C31) + (∑ odd C23–C33))/2 * (∑even C22–C32)
Andersson and Meyers, 2012		Lek-Vorkuta region, Russia	67.4167	63.3667	160	-5.8	531	July-August	0.75	0.8											Vaccinium vitis-idaea, Ledum palustre		ASE, DCM:MeOH		78		25	19-33			5.9	((∑ odd C21–C31) + (∑ odd C23–C33))/2 * (∑even C22–C32)
Andersson and Meyers, 2012		Lek-Vorkuta region, Russia	67.4167	63.3667	160	-5.8	531	July-August	0.85	0.9											Vaccinium vitis-idaea, Ledum palustre		ASE, DCM:MeOH		79		27	19-33			4.9	((∑ odd C21–C31) + (∑ odd C23–C33))/2 * (∑even C22–C32)
Andersson and Meyers, 2012		Lek-Vorkuta region, Russia	67.4167	63.3667	160	-5.8	531	July-August	0.95	1											Vaccinium vitis-idaea, Ledum palustre		ASE, DCM:MeOH		81		27	19-33			6.2	((∑ odd C21–C31) + (∑ odd C23–C33))/2 * (∑even C22–C32)
Andersson and Meyers, 2012		Lek-Vorkuta region, Russia	67.4167	63.3667	160	-5.8	531	July-August		1.2											Vaccinium vitis-idaea, Ledum palustre		ASE, DCM:MeOH		138		27	19-33			4	((∑ odd C21–C31) + (∑ odd C23–C33))/2 * (∑even C22–C32)
Andersson and Meyers, 2012		Lek-Vorkuta region, Russia	67.4167	63.3667	160	-5.8	531	July-August		1.4											Vaccinium vitis-idaea, Ledum palustre		ASE, DCM:MeOH		55		25	19-33			4.4	((∑ odd C21–C31) + (∑ odd C23–C33))/2 * (∑even C22–C32)
Andersson and Meyers, 2012		Lek-Vorkuta region, Russia	67.4167	63.3667	160	-5.8	531	July-August		1.6											Vaccinium vitis-idaea, Ledum palustre		ASE, DCM:MeOH		72		29	19-33			3.1	((∑ odd C21–C31) + (∑ odd C23–C33))/2 * (∑even C22–C32)
Andersson and Meyers, 2012		Lek-Vorkuta region, Russia	67.4167	63.3667	160	-5.8	531	July-August		1.8											Vaccinium vitis-idaea, Ledum palustre		ASE, DCM:MeOH		30		29	19-33			2.9	((∑ odd C21–C31) + (∑ odd C23–C33))/2 * (∑even C22–C32)
Andersson and Meyers, 2012		Lek-Vorkuta region, Russia	67.4167	63.3667	160	-5.8	531	July-August		2											Vaccinium vitis-idaea, Ledum palustre		ASE, DCM:MeOH		59		25	19-33			2.8	((∑ odd C21–C31) + (∑ odd C23–C33))/2 * (∑even C22–C32)
Angst et al., 2016	Leaves	Grinderwald, Germany	52.5667	9.3								Fresh material									Fagus sylvatica		ASE, DCM:MeOH		332.4		27	21-33			30.3	0.5 (∑ odd C21- C31/∑ even C20-C30)/(∑ odd C21- C31/∑ even C22-C32)				0.6	0.5	2.2	2.6	15.2	5.6	302.3	2.2	13.6	0.2	1.2	0.1	0.1
Angst et al., 2016	Roots	Grinderwald, Germany	52.5667	9.3								Roots									Fagus sylvatica		ASE, DCM:MeOH		15.2		27	20-33			2.2	0.5 (∑ odd C21- C31/∑ even C20-C30)/(∑ odd C21- C31/∑ even C22-C32)			0.2	0.4	0.5	0.7	1	2	2.2	8.4	2	2.5	1.1	1.8	0.4	0.5
Angst et al., 2016	Bsw	Grinderwald, Germany	52.5667	9.3						0.1	Bsw		Dystric Cambisol	3.4-4.5	77.3	18.4	4.4			1.16	Fagus sylvatica		ASE, DCM:MeOH				27	17-33			5.6	0.5 (∑ odd C21- C31/∑ even C20-C30)/(∑ odd C21- C31/∑ even C22-C32)
Angst et al., 2016	Bw	Grinderwald, Germany	52.5667	9.3						0.35	Bw		Dystric Cambisol	3.4-4.5	77.3	18.4	4.4			0.52	Fagus sylvatica		ASE, DCM:MeOH				27	17-33
Angst et al., 2016	I Cv	Grinderwald, Germany	52.5667	9.3						0.6	I Cv		Dystric Cambisol	3.4-4.5	77.3	18.4	4.4			0.13	Fagus sylvatica		ASE, DCM:MeOH				31	18-33			2.8	0.5 (∑ odd C21- C31/∑ even C20-C30)/(∑ odd C21- C31/∑ even C22-C32)
Angst et al., 2016	II Cv	Grinderwald, Germany	52.5667	9.3						0.85	II Cv		Dystric Cambisol	3.4-4.5	77.3	18.4	4.4			0.05	Fagus sylvatica		ASE, DCM:MeOH				29	18-33
Angst et al., 2016	II Cv	Grinderwald, Germany	52.5667	9.3						1.1	II Cv		Dystric Cambisol	3.4-4.5	77.3	18.4	4.4			0.04	Fagus sylvatica		ASE, DCM:MeOH				29	19-33
Anokhina et al., 2018	Point_1	Losiny Ostrov National Park, Russia	55.8663	37.8327				November				Litter	Albic Retisols (Ochric))							46.8	First tier: Lime tree (Tilia cordata) Second tier: common hazel (Corylus avellana), Norway maple (Acer platanoides), and mountain ash (Sorbus aucuparia. Herbaceous layer: ground elder (Aegopodium podagraria), hairy sedge (Саrex pilosa), dog’s mercury (Mercurialis perennis), male fern (Dryopteris filix-mas), and yellow archangel (Galeobdolon uteum)		ASE, Chloroform: MeOH		9175								13	(∑ odd C25-C33)/ (∑ even C24-C32)
Anokhina et al., 2018	Point_1	Losiny Ostrov National Park, Russia	55.8663	37.8327				November	0	0.05	AY		Albic Retisols (Ochric))							4.6	First tier: Lime tree (Tilia cordata) Second tier: common hazel (Corylus avellana), Norway maple (Acer platanoides), and mountain ash (Sorbus aucuparia. Herbaceous layer: ground elder (Aegopodium podagraria), hairy sedge (Саrex pilosa), dog’s mercury (Mercurialis perennis), male fern (Dryopteris filix-mas), and yellow archangel (Galeobdolon uteum)		ASE, Chloroform: MeOH		95								5	(∑ odd C25-C33)/ (∑ even C24-C32)
Anokhina et al., 2018	Point_1	Losiny Ostrov National Park, Russia	55.8663	37.8327				November	0.05	0.1	AYel		Albic Retisols (Ochric))							3.8	First tier: Lime tree (Tilia cordata) Second tier: common hazel (Corylus avellana), Norway maple (Acer platanoides), and mountain ash (Sorbus aucuparia. Herbaceous layer: ground elder (Aegopodium podagraria), hairy sedge (Саrex pilosa), dog’s mercury (Mercurialis perennis), male fern (Dryopteris filix-mas), and yellow archangel (Galeobdolon uteum)		ASE, Chloroform: MeOH		195								4	(∑ odd C25-C33)/ (∑ even C24-C32)
Anokhina et al., 2018	Point_2	Losiny Ostrov National Park, Russia	55.8663	37.8327				November				Litter	Albic Retisols (Ochric))							45	First tier: Lime tree (Tilia cordata) Second tier: common hazel (Corylus avellana), Norway maple (Acer platanoides), and mountain ash (Sorbus aucuparia. Herbaceous layer: ground elder (Aegopodium podagraria), hairy sedge (Саrex pilosa), dog’s mercury (Mercurialis perennis), male fern (Dryopteris filix-mas), and yellow archangel (Galeobdolon uteum)		ASE, Chloroform: MeOH		5541								9	(∑ odd C25-C33)/ (∑ even C24-C32)
Anokhina et al., 2018	Point_2	Losiny Ostrov National Park, Russia	55.8663	37.8327				November	0	0.02	AY		Albic Retisols (Ochric))								First tier: Lime tree (Tilia cordata) Second tier: common hazel (Corylus avellana), Norway maple (Acer platanoides), and mountain ash (Sorbus aucuparia. Herbaceous layer: ground elder (Aegopodium podagraria), hairy sedge (Саrex pilosa), dog’s mercury (Mercurialis perennis), male fern (Dryopteris filix-mas), and yellow archangel (Galeobdolon uteum)		ASE, Chloroform: MeOH										10	(∑ odd C25-C33)/ (∑ even C24-C32)
Anokhina et al., 2018	Point_2	Losiny Ostrov National Park, Russia	55.8663	37.8327				November	0	0.05	AY		Albic Retisols (Ochric))							4.2	First tier: Lime tree (Tilia cordata) Second tier: common hazel (Corylus avellana), Norway maple (Acer platanoides), and mountain ash (Sorbus aucuparia. Herbaceous layer: ground elder (Aegopodium podagraria), hairy sedge (Саrex pilosa), dog’s mercury (Mercurialis perennis), male fern (Dryopteris filix-mas), and yellow archangel (Galeobdolon uteum)		ASE, Chloroform: MeOH		91								6	(∑ odd C25-C33)/ (∑ even C24-C32)
Anokhina et al., 2018	Point_2	Losiny Ostrov National Park, Russia	55.8663	37.8327				November	0.02	0.05	AY		Albic Retisols (Ochric))								First tier: Lime tree (Tilia cordata) Second tier: common hazel (Corylus avellana), Norway maple (Acer platanoides), and mountain ash (Sorbus aucuparia. Herbaceous layer: ground elder (Aegopodium podagraria), hairy sedge (Саrex pilosa), dog’s mercury (Mercurialis perennis), male fern (Dryopteris filix-mas), and yellow archangel (Galeobdolon uteum)		ASE, Chloroform: MeOH										8	(∑ odd C25-C33)/ (∑ even C24-C32)
Anokhina et al., 2018	Point_2	Losiny Ostrov National Park, Russia	55.8663	37.8327				November	0.05	0.1	AYel		Albic Retisols (Ochric))							2.5	First tier: Lime tree (Tilia cordata) Second tier: common hazel (Corylus avellana), Norway maple (Acer platanoides), and mountain ash (Sorbus aucuparia. Herbaceous layer: ground elder (Aegopodium podagraria), hairy sedge (Саrex pilosa), dog’s mercury (Mercurialis perennis), male fern (Dryopteris filix-mas), and yellow archangel (Galeobdolon uteum)		ASE, Chloroform: MeOH		200								4	(∑ odd C25-C33)/ (∑ even C24-C32)
Anokhina et al., 2018	Point_2	Losiny Ostrov National Park, Russia	55.8663	37.8327				November	0.05	0.12	AYel		Albic Retisols (Ochric))								First tier: Lime tree (Tilia cordata) Second tier: common hazel (Corylus avellana), Norway maple (Acer platanoides), and mountain ash (Sorbus aucuparia. Herbaceous layer: ground elder (Aegopodium podagraria), hairy sedge (Саrex pilosa), dog’s mercury (Mercurialis perennis), male fern (Dryopteris filix-mas), and yellow archangel (Galeobdolon uteum)		ASE, Chloroform: MeOH										6	(∑ odd C25-C33)/ (∑ even C24-C32)
Anokhina et al., 2018	Point_2	Losiny Ostrov National Park, Russia	55.8663	37.8327				November	0.12	0.28	EL		Albic Retisols (Ochric))								First tier: Lime tree (Tilia cordata) Second tier: common hazel (Corylus avellana), Norway maple (Acer platanoides), and mountain ash (Sorbus aucuparia. Herbaceous layer: ground elder (Aegopodium podagraria), hairy sedge (Саrex pilosa), dog’s mercury (Mercurialis perennis), male fern (Dryopteris filix-mas), and yellow archangel (Galeobdolon uteum)		ASE, Chloroform: MeOH										1	(∑ odd C25-C33)/ (∑ even C24-C32)
Anokhina et al., 2018	Point_2	Losiny Ostrov National Park, Russia	55.8663	37.8327				November	0.28	0.6	BT		Albic Retisols (Ochric))								First tier: Lime tree (Tilia cordata) Second tier: common hazel (Corylus avellana), Norway maple (Acer platanoides), and mountain ash (Sorbus aucuparia. Herbaceous layer: ground elder (Aegopodium podagraria), hairy sedge (Саrex pilosa), dog’s mercury (Mercurialis perennis), male fern (Dryopteris filix-mas), and yellow archangel (Galeobdolon uteum)		ASE, Chloroform: MeOH										2	(∑ odd C25-C33)/ (∑ even C24-C32)
Anokhina et al., 2018	Point_3	Losiny Ostrov National Park, Russia	55.8663	37.8327				November				Litter	Albic Retisols (Ochric))							44.9	First tier: Lime tree (Tilia cordata) Second tier: common hazel (Corylus avellana), Norway maple (Acer platanoides), and mountain ash (Sorbus aucuparia. Herbaceous layer: ground elder (Aegopodium podagraria), hairy sedge (Саrex pilosa), dog’s mercury (Mercurialis perennis), male fern (Dryopteris filix-mas), and yellow archangel (Galeobdolon uteum)		ASE, Chloroform: MeOH		7068								20	(∑ odd C25-C33)/ (∑ even C24-C32)
Anokhina et al., 2018	Point_3	Losiny Ostrov National Park, Russia	55.8663	37.8327				November	0	0.02	AY		Albic Retisols (Ochric))								First tier: Lime tree (Tilia cordata) Second tier: common hazel (Corylus avellana), Norway maple (Acer platanoides), and mountain ash (Sorbus aucuparia. Herbaceous layer: ground elder (Aegopodium podagraria), hairy sedge (Саrex pilosa), dog’s mercury (Mercurialis perennis), male fern (Dryopteris filix-mas), and yellow archangel (Galeobdolon uteum)		ASE, Chloroform: MeOH										11	(∑ odd C25-C33)/ (∑ even C24-C32)
Anokhina et al., 2018	Point_3	Losiny Ostrov National Park, Russia	55.8663	37.8327				November	0	0.05	AY		Albic Retisols (Ochric))							3	First tier: Lime tree (Tilia cordata) Second tier: common hazel (Corylus avellana), Norway maple (Acer platanoides), and mountain ash (Sorbus aucuparia. Herbaceous layer: ground elder (Aegopodium podagraria), hairy sedge (Саrex pilosa), dog’s mercury (Mercurialis perennis), male fern (Dryopteris filix-mas), and yellow archangel (Galeobdolon uteum)		ASE, Chloroform: MeOH		111								5	(∑ odd C25-C33)/ (∑ even C24-C32)
Anokhina et al., 2018	Point_3	Losiny Ostrov National Park, Russia	55.8663	37.8327				November	0.02	0.05	AY		Albic Retisols (Ochric))								First tier: Lime tree (Tilia cordata) Second tier: common hazel (Corylus avellana), Norway maple (Acer platanoides), and mountain ash (Sorbus aucuparia. Herbaceous layer: ground elder (Aegopodium podagraria), hairy sedge (Саrex pilosa), dog’s mercury (Mercurialis perennis), male fern (Dryopteris filix-mas), and yellow archangel (Galeobdolon uteum)		ASE, Chloroform: MeOH										7	(∑ odd C25-C33)/ (∑ even C24-C32)
Anokhina et al., 2018	Point_3	Losiny Ostrov National Park, Russia	55.8663	37.8327				November	0.05	0.1	AYel		Albic Retisols (Ochric))							2.1	First tier: Lime tree (Tilia cordata) Second tier: common hazel (Corylus avellana), Norway maple (Acer platanoides), and mountain ash (Sorbus aucuparia. Herbaceous layer: ground elder (Aegopodium podagraria), hairy sedge (Саrex pilosa), dog’s mercury (Mercurialis perennis), male fern (Dryopteris filix-mas), and yellow archangel (Galeobdolon uteum)		ASE, Chloroform: MeOH		185								4	(∑ odd C25-C33)/ (∑ even C24-C32)
Anokhina et al., 2018	Point_3	Losiny Ostrov National Park, Russia	55.8663	37.8327				November	0.05	0.12	AYel		Albic Retisols (Ochric))								First tier: Lime tree (Tilia cordata) Second tier: common hazel (Corylus avellana), Norway maple (Acer platanoides), and mountain ash (Sorbus aucuparia. Herbaceous layer: ground elder (Aegopodium podagraria), hairy sedge (Саrex pilosa), dog’s mercury (Mercurialis perennis), male fern (Dryopteris filix-mas), and yellow archangel (Galeobdolon uteum)		ASE, Chloroform: MeOH										5	(∑ odd C25-C33)/ (∑ even C24-C32)
Anokhina et al., 2018	Point_3	Losiny Ostrov National Park, Russia	55.8663	37.8327				November	0.12	0.28	EL		Albic Retisols (Ochric))								First tier: Lime tree (Tilia cordata) Second tier: common hazel (Corylus avellana), Norway maple (Acer platanoides), and mountain ash (Sorbus aucuparia. Herbaceous layer: ground elder (Aegopodium podagraria), hairy sedge (Саrex pilosa), dog’s mercury (Mercurialis perennis), male fern (Dryopteris filix-mas), and yellow archangel (Galeobdolon uteum)		ASE, Chloroform: MeOH										1	(∑ odd C25-C33)/ (∑ even C24-C32)
Anokhina et al., 2018	Point_3	Losiny Ostrov National Park, Russia	55.8663	37.8327				November	0.28	0.6	BT		Albic Retisols (Ochric))								First tier: Lime tree (Tilia cordata) Second tier: common hazel (Corylus avellana), Norway maple (Acer platanoides), and mountain ash (Sorbus aucuparia. Herbaceous layer: ground elder (Aegopodium podagraria), hairy sedge (Саrex pilosa), dog’s mercury (Mercurialis perennis), male fern (Dryopteris filix-mas), and yellow archangel (Galeobdolon uteum)		ASE, Chloroform: MeOH										3	(∑ odd C25-C33)/ (∑ even C24-C32)
Anokhina et al., 2018	Point_4	Losiny Ostrov National Park, Russia	55.8663	37.8327				November				Litter	Albic Retisols (Ochric))							45.1	First tier: Lime tree (Tilia cordata) Second tier: common hazel (Corylus avellana), Norway maple (Acer platanoides), and mountain ash (Sorbus aucuparia. Herbaceous layer: ground elder (Aegopodium podagraria), hairy sedge (Саrex pilosa), dog’s mercury (Mercurialis perennis), male fern (Dryopteris filix-mas), and yellow archangel (Galeobdolon uteum)		ASE, Chloroform: MeOH		6450								14	(∑ odd C25-C33)/ (∑ even C24-C32)
Anokhina et al., 2018	Point_4	Losiny Ostrov National Park, Russia	55.8663	37.8327				November	0	0.05	AY		Albic Retisols (Ochric))							3.9	First tier: Lime tree (Tilia cordata) Second tier: common hazel (Corylus avellana), Norway maple (Acer platanoides), and mountain ash (Sorbus aucuparia. Herbaceous layer: ground elder (Aegopodium podagraria), hairy sedge (Саrex pilosa), dog’s mercury (Mercurialis perennis), male fern (Dryopteris filix-mas), and yellow archangel (Galeobdolon uteum)		ASE, Chloroform: MeOH		86								6	(∑ odd C25-C33)/ (∑ even C24-C32)
Anokhina et al., 2018	Point_4	Losiny Ostrov National Park, Russia	55.8663	37.8327				November	0.05	0.1	AYel		Albic Retisols (Ochric))							2	First tier: Lime tree (Tilia cordata) Second tier: common hazel (Corylus avellana), Norway maple (Acer platanoides), and mountain ash (Sorbus aucuparia. Herbaceous layer: ground elder (Aegopodium podagraria), hairy sedge (Саrex pilosa), dog’s mercury (Mercurialis perennis), male fern (Dryopteris filix-mas), and yellow archangel (Galeobdolon uteum)		ASE, Chloroform: MeOH		190								6	(∑ odd C25-C33)/ (∑ even C24-C32)
Bliedtner et al., 2018	1p	Georgia	41.7122	45.066	742	11.362	600-800	September				Fresh material									steppe, poaceae		Ultrasonic, DCM:MeOH			79.8777	33	23-35	31.1713	∑Ci x i/ ∑Ci , i=27-33			8.27592	(∑ odd C27-C33)/ (∑ even C26-C32)
Bliedtner et al., 2018	1s	Georgia	41.7122	45.066	742	11.362	600-800	September	0	0.05											steppe, poaceae		Ultrasonic, DCM:MeOH			2.3974	31	23-35	30.3326	∑Ci x i/ ∑Ci , i=27-33			6.4468	(∑ odd C27-C33)/ (∑ even C26-C32)
Bliedtner et al., 2018	2p	Georgia	41.7103	45.1058	809	10.9265	600-800	September				Fresh material									cultivated grassland, cropland		Ultrasonic, DCM:MeOH			100.234	31	23-35	30.3291	∑Ci x i/ ∑Ci , i=27-33			13.3863	(∑ odd C27-C33)/ (∑ even C26-C32)
Bliedtner et al., 2018	2s	Georgia	41.7103	45.1058	809	10.9265	600-800	September	0	0.05											cultivated grassland, cropland		Ultrasonic, DCM:MeOH			3.16424	31	23-35	30.1634	∑Ci x i/ ∑Ci , i=27-33			6.78523	(∑ odd C27-C33)/ (∑ even C26-C32)
Bliedtner et al., 2018	4p	Georgia	41.7527	45.1421	871	10.5235	600-800	September				Fresh material									cultivated grassland, grazing		Ultrasonic, DCM:MeOH			71.6424	33	23-35	31.0292	∑Ci x i/ ∑Ci , i=27-33			7.94137	(∑ odd C27-C33)/ (∑ even C26-C32)
Bliedtner et al., 2018	4s	Georgia	41.7527	45.1421	871	10.5235	600-800	September	0	0.05											cultivated grassland, grazing		Ultrasonic, DCM:MeOH			3.71729	31	23-35	30.2522	∑Ci x i/ ∑Ci , i=27-33			3.51015	(∑ odd C27-C33)/ (∑ even C26-C32)
Bliedtner et al., 2018	6p	Georgia	41.853	45.1393	887	10.4195	600-800	September				Fresh material									grassland, meadow		Ultrasonic, DCM:MeOH			131.936	31	23-35	30.9129	∑Ci x i/ ∑Ci , i=27-33			18.706	(∑ odd C27-C33)/ (∑ even C26-C32)
Bliedtner et al., 2018	6s	Georgia	41.853	45.1393	887	10.4195	600-800	September	0	0.05											grassland, meadow		Ultrasonic, DCM:MeOH			3.28172	31	23-35	30.5199	∑Ci x i/ ∑Ci , i=27-33			5.22707	(∑ odd C27-C33)/ (∑ even C26-C32)
Bliedtner et al., 2018	7p	Georgia	41.8599	45.2341	1199	8.39	600-800	September				Fresh material									grassland, meadow		Ultrasonic, DCM:MeOH			38.4642	31	23-35	30.5318	∑Ci x i/ ∑Ci , i=27-33			10.1066	(∑ odd C27-C33)/ (∑ even C26-C32)
Bliedtner et al., 2018	7s	Georgia	41.8599	45.2341	1199	8.39	600-800	September	0	0.05											grassland, meadow		Ultrasonic, DCM:MeOH			6.635	31	23-35	30.1426	∑Ci x i/ ∑Ci , i=27-33			9.56283	(∑ odd C27-C33)/ (∑ even C26-C32)
Bliedtner et al., 2018	9p	Georgia	41.8662	45.2788	1659	5.4	600-800	September				Fresh material									cultivated grassland, grazing		Ultrasonic, DCM:MeOH			155.575	29	23-35	29.3349	∑Ci x i/ ∑Ci , i=27-33			14.045	(∑ odd C27-C33)/ (∑ even C26-C32)
Bliedtner et al., 2018	9s	Georgia	41.8662	45.2788	1659	5.4	600-800	September	0	0.05											cultivated grassland, grazing		Ultrasonic, DCM:MeOH			6.43223	31	23-35	30.6367	∑Ci x i/ ∑Ci , i=27-33			8.7616	(∑ odd C27-C33)/ (∑ even C26-C32)
Bliedtner et al., 2018	10p	Georgia	42.0382	45.2715	485	13.03	800-1000	September				Fresh material									cultivated grassland, grazing		Ultrasonic, DCM:MeOH			78.1374	31	23-35	30.8927	∑Ci x i/ ∑Ci , i=27-33			8.50872	(∑ odd C27-C33)/ (∑ even C26-C32)
Bliedtner et al., 2018	10s	Georgia	42.0382	45.2715	485	13.03	800-1000	September	0	0.05											cultivated grassland, grazing		Ultrasonic, DCM:MeOH			1.05393	31	23-35	29.8992	∑Ci x i/ ∑Ci , i=27-33			3.86963	(∑ odd C27-C33)/ (∑ even C26-C32)
Bliedtner et al., 2018	21p	Georgia	42.157	45.2981	645	11.99	1000-1200	September				Fresh material									cultivated grassland, grazing		Ultrasonic, DCM:MeOH			125.503	31	23-35	30.764	∑Ci x i/ ∑Ci , i=27-33			11.6753	(∑ odd C27-C33)/ (∑ even C26-C32)
Bliedtner et al., 2018	21s	Georgia	42.157	45.2981	645	11.99	1000-1200	September	0	0.05											cultivated grassland, grazing		Ultrasonic, DCM:MeOH			2.5027	31	23-35	30.4439	∑Ci x i/ ∑Ci , i=27-33			3.04688	(∑ odd C27-C33)/ (∑ even C26-C32)
Bliedtner et al., 2018	22p	Georgia	42.1339	45.2901	622	12.14	1000-1200	September				Fresh material									cultivated grassland, grazing		Ultrasonic, DCM:MeOH			79.1873	31	23-35	30.793	∑Ci x i/ ∑Ci , i=27-33			9.01841	(∑ odd C27-C33)/ (∑ even C26-C32)
Bliedtner et al., 2018	22s	Georgia	42.1339	45.2901	622	12.14	1000-1200	September	0	0.05											cultivated grassland, grazing		Ultrasonic, DCM:MeOH			2.48946	31	23-35	30.578	∑Ci x i/ ∑Ci , i=27-33			6.56975	(∑ odd C27-C33)/ (∑ even C26-C32)
Bliedtner et al., 2018	24p	Georgia	42.1704	45.3261	748	11.32	1200-1600	September				Fresh material									grassland, meadow		Ultrasonic, DCM:MeOH			67.2619	31	23-35	30.0851	∑Ci x i/ ∑Ci , i=27-33			8.70884	(∑ odd C27-C33)/ (∑ even C26-C32)
Bliedtner et al., 2018	24s	Georgia	42.1704	45.3261	748	11.32	1200-1600	September	0	0.05											grassland, meadow		Ultrasonic, DCM:MeOH			1.12616	31	23-35	30.0462	∑Ci x i/ ∑Ci , i=27-33			6.05478	(∑ odd C27-C33)/ (∑ even C26-C32)
Bliedtner et al., 2018	25p	Georgia	42.0537	45.1763	570	12.48	800-1000	September				Fresh material									grassland, meadow		Ultrasonic, DCM:MeOH			299.147	29	23-35	29.6229	∑Ci x i/ ∑Ci , i=27-33			14.4367	(∑ odd C27-C33)/ (∑ even C26-C32)
Bliedtner et al., 2018	25s	Georgia	42.0537	45.1763	570	12.48	800-1000	September	0	0.05											grassland, meadow		Ultrasonic, DCM:MeOH			1.95744	31	23-35	29.9214	∑Ci x i/ ∑Ci , i=27-33			6.94837	(∑ odd C27-C33)/ (∑ even C26-C32)
Bliedtner et al., 2018	31p	Georgia	42.0897	45.1084	705	11.6	800-1000	September				Fresh material									grassland, meadow		Ultrasonic, DCM:MeOH			30.3492	31	23-35	30.6721	∑Ci x i/ ∑Ci , i=27-33			6.56653	(∑ odd C27-C33)/ (∑ even C26-C32)
Bliedtner et al., 2018	31s	Georgia	42.0897	45.1084	705	11.6	800-1000	September	0	0.05											grassland, meadow		Ultrasonic, DCM:MeOH			2.26023	31	23-35	30.2214	∑Ci x i/ ∑Ci , i=27-33			5.39026	(∑ odd C27-C33)/ (∑ even C26-C32)
Bliedtner et al., 2018	32p	Georgia	42.0701	45.1047	685	11.73	800-1000	September				Fresh material									grassland, meadow, Artemisia		Ultrasonic, DCM:MeOH			101.085	31	23-35	30.5346	∑Ci x i/ ∑Ci , i=27-33			14.3328	(∑ odd C27-C33)/ (∑ even C26-C32)
Bliedtner et al., 2018	32s	Georgia	42.0701	45.1047	685	11.73	800-1000	September	0	0.05											grassland, meadow, Artemisia		Ultrasonic, DCM:MeOH			3.79265	29	23-35	30.0267	∑Ci x i/ ∑Ci , i=27-33			7.38247	(∑ odd C27-C33)/ (∑ even C26-C32)
Bliedtner et al., 2018	34p	Georgia	42.0367	45.3594	445	13.29	800-1000	September				Fresh material									cultivated grassland, grazing		Ultrasonic, DCM:MeOH			25.4106	29	23-35	29.2741	∑Ci x i/ ∑Ci , i=27-33			6.07976	(∑ odd C27-C33)/ (∑ even C26-C32)
Bliedtner et al., 2018	34s	Georgia	42.0367	45.3594	445	13.29	800-1000	September	0	0.05											cultivated grassland, grazing		Ultrasonic, DCM:MeOH			3.12255	31	23-35	30.1359	∑Ci x i/ ∑Ci , i=27-33			4.70047	(∑ odd C27-C33)/ (∑ even C26-C32)
Bliedtner et al., 2018	3p	Georgia	41.7542	45.1349	924	10.18	600-800	September				Fresh material									forest, hornbeam		Ultrasonic, DCM:MeOH			96.8065	29	23-33	29.8541	∑Ci x i/ ∑Ci , i=27-33			14.4652	(∑ odd C27-C33)/ (∑ even C26-C32)
Bliedtner et al., 2018	3s	Georgia	41.7542	45.1349	924	10.18	600-800	September	0	0.05											forest, hornbeam		Ultrasonic, DCM:MeOH			5.69356	29	23-35	29.4013	∑Ci x i/ ∑Ci , i=27-33			7.61899	(∑ odd C27-C33)/ (∑ even C26-C32)
Bliedtner et al., 2018	5p	Georgia	41.8014	45.153	830	10.79	600-800	September				Fresh material									forest, hornbeam		Ultrasonic, DCM:MeOH			77.7225	29	23-33	29.7904	∑Ci x i/ ∑Ci , i=27-33			13.7732	(∑ odd C27-C33)/ (∑ even C26-C32)
Bliedtner et al., 2018	5s	Georgia	41.8014	45.153	830	10.79	600-800	September	0	0.05											forest, hornbeam		Ultrasonic, DCM:MeOH			8.6624	29	23-35	29.1451	∑Ci x i/ ∑Ci , i=27-33			8.75811	(∑ odd C27-C33)/ (∑ even C26-C32)
Bliedtner et al., 2018	16p	Georgia	42.2619	45.3392	990	9.75	1600-2000	September				Fresh material									forest, hornbeam		Ultrasonic, DCM:MeOH			31.1624	29	23-33	29.0644	∑Ci x i/ ∑Ci , i=27-33			7.45589	(∑ odd C27-C33)/ (∑ even C26-C32)
Bliedtner et al., 2018	16s	Georgia	42.2619	45.3392	990	9.75	1600-2000	September	0	0.05											forest, hornbeam		Ultrasonic, DCM:MeOH			7.25939	29	23-35	29.212	∑Ci x i/ ∑Ci , i=27-33			8.59482	(∑ odd C27-C33)/ (∑ even C26-C32)
Bliedtner et al., 2018	20p	Georgia	42.2197	45.311	790	11.05	1200-1600	September				Fresh material									forest, hornbeam		Ultrasonic, DCM:MeOH			26.0759	29	23-33	29.3573	∑Ci x i/ ∑Ci , i=27-33			5.22481	(∑ odd C27-C33)/ (∑ even C26-C32)
Bliedtner et al., 2018	20s	Georgia	42.2197	45.311	790	11.05	1200-1600	September	0	0.05											forest, hornbeam		Ultrasonic, DCM:MeOH			3.3669	29	23-35	28.7127	∑Ci x i/ ∑Ci , i=27-33			6.28691	(∑ odd C27-C33)/ (∑ even C26-C32)
Bliedtner et al., 2018	23p	Georgia	42.1944	45.3231	759	11.25	1200-1600	September				Fresh material									forest in patches, hornbeam		Ultrasonic, DCM:MeOH			16.9356	29	23-35	29.0996	∑Ci x i/ ∑Ci , i=27-33			6.22177	(∑ odd C27-C33)/ (∑ even C26-C32)
Bliedtner et al., 2018	23s	Georgia	42.1944	45.3231	759	11.25	1200-1600	September	0	0.05											forest in patches, hornbeam		Ultrasonic, DCM:MeOH			1.11889	31	23-35	30.4217	∑Ci x i/ ∑Ci , i=27-33			8.69063	(∑ odd C27-C33)/ (∑ even C26-C32)
Bliedtner et al., 2018	29p	Georgia	42.1225	45.1193	774	11.15	800-1000	September				Fresh material									forest, hasel, hornbeam…		Ultrasonic, DCM:MeOH			193.14	31	23-35	30.1977	∑Ci x i/ ∑Ci , i=27-33			13.7827	(∑ odd C27-C33)/ (∑ even C26-C32)
Bliedtner et al., 2018	29s	Georgia	42.1225	45.1193	774	11.15	800-1000	September	0	0.05											forest, hasel, hornbeam…		Ultrasonic, DCM:MeOH			6.90044	29	23-35	29.7376	∑Ci x i/ ∑Ci , i=27-33			9.04813	(∑ odd C27-C33)/ (∑ even C26-C32)
Bliedtner et al., 2018	30p	Georgia	42.0953	45.1088	728	11.45	800-1000	September				Fresh material									forest, hornbeam		Ultrasonic, DCM:MeOH			48.5972	29	23-35	28.7775	∑Ci x i/ ∑Ci , i=27-33			12.1077	(∑ odd C27-C33)/ (∑ even C26-C32)
Bliedtner et al., 2018	30s	Georgia	42.0953	45.1088	728	11.45	800-1000	September	0	0.05											forest, hornbeam		Ultrasonic, DCM:MeOH			4.85759	29	23-35	29.0058	∑Ci x i/ ∑Ci , i=27-33			6.47216	(∑ odd C27-C33)/ (∑ even C26-C32)
Bliedtner et al., 2018	35p	Georgia	42.0722	45.0553	1174	8.55	800-1000	September				Fresh material									forest, hornbeam		Ultrasonic, DCM:MeOH			18.0584	29	23-35	29.159	∑Ci x i/ ∑Ci , i=27-33			4.31304	(∑ odd C27-C33)/ (∑ even C26-C32)
Bliedtner et al., 2018	35s	Georgia	42.0722	45.0553	1174	8.55	800-1000	September	0	0.05											forest, hornbeam		Ultrasonic, DCM:MeOH			8.07578	29	23-35	28.6202	∑Ci x i/ ∑Ci , i=27-33			5.09135	(∑ odd C27-C33)/ (∑ even C26-C32)
Buggle et al., 2010		Mircea Voda, Romania	44.3167	28.1833						0			calcic Chernozem								steppe		Soxhlet, methanol:toluol			3.02294	31	15-33																					0.0329624
Buggle et al., 2010		Mircea Voda	44.3167	28.1833						0.225			calcic Chernozem								steppe		Soxhlet, methanol:toluol			1.89531	31	15-33																					0.0267046
Buggle et al., 2010		Mircea Voda	44.3167	28.1833						0.375			calcic Chernozem								steppe		Soxhlet, methanol:toluol			2.07093	31	15-33																					0.0307326
Buggle et al., 2010		Mircea Voda	44.3167	28.1833						0.525			calcic Chernozem								steppe		Soxhlet, methanol:toluol			1.71866	29	15-33																					0.0335294
Buggle et al., 2010		Mircea Voda	44.3167	28.1833						0.675			calcic Chernozem								steppe		Soxhlet, methanol:toluol			1.5103	31	15-33																					0.0209154
Buggle et al., 2010		Mircea Voda	44.3167	28.1833						0.825			calcic Chernozem								steppe		Soxhlet, methanol:toluol			1.75003	31	15-33																					0.0161469
Buggle et al., 2010		Mircea Voda	44.3167	28.1833						0.975			calcic Chernozem								steppe		Soxhlet, methanol:toluol			0.870786	31	15-33																					0.0119974
Bush and McInerney, 2015	RTB001-S1	Forest Hill Cemetery	48.5787	-93.3797		3.30792	674.71	September	0.02	0.08													Microwave, DCM:MeOH			2.66217	31	18-36	29.0693	∑Ci x i/ ∑Ci , i=21-39	9.42813	(∑ odd C21-C37) + (∑ odd C23-C39) / (∑ even C22-C38)
Bush and McInerney, 2015	RTB002-S1	Koochiching State Forest	48.5989	-93.2332		3.29542	677.03	September	0.02	0.08													Microwave, DCM:MeOH			0.556122	31	19-36	29.0315	∑Ci x i/ ∑Ci , i=21-39	2.56351	(∑ odd C21-C37) + (∑ odd C23-C39) / (∑ even C22-C38)
Bush and McInerney, 2015	RTB003-S1	Gronwoldt Landing	48.1219	-93.6963		3.78708	680.63	September	0.02	0.08													Microwave, DCM:MeOH			2.47867	27	17-37	27.6179	∑Ci x i/ ∑Ci , i=21-39	6.43075	(∑ odd C21-C37) + (∑ odd C23-C39) / (∑ even C22-C38)
Bush and McInerney, 2015	RTB004-S1	Margie Cemetery	48.0817	-93.9594		3.72083	677.48	September	0.02	0.08													Microwave, DCM:MeOH			1.28185	27	19-37	28.1915	∑Ci x i/ ∑Ci , i=21-39	6.20624	(∑ odd C21-C37) + (∑ odd C23-C39) / (∑ even C22-C38)
Bush and McInerney, 2015	RTB005-S1	Lake Bemidji State Park	47.5415	-94.8233		4.20375	642.76	September	0.02	0.08													Microwave, DCM:MeOH			3.43514	29	18-37	29.1563	∑Ci x i/ ∑Ci , i=21-39	6.49033	(∑ odd C21-C37) + (∑ odd C23-C39) / (∑ even C22-C38)
Bush and McInerney, 2015	RTB006-S1	Evergreen Cemetery	47.2196	-94.8598		4.25375	667.11	September	0.02	0.08													Microwave, DCM:MeOH			1.45722	31	19-35	28.798	∑Ci x i/ ∑Ci , i=21-39	4.5174	(∑ odd C21-C37) + (∑ odd C23-C39) / (∑ even C22-C38)
Bush and McInerney, 2015	RTB007-S1	Itasca State Park, LaSalle Trail	47.2336	-95.1878		4.09625	680.25	September	0.02	0.08													Microwave, DCM:MeOH			0.590634	27	19-35	27.9766	∑Ci x i/ ∑Ci , i=21-39	5.04952	(∑ odd C21-C37) + (∑ odd C23-C39) / (∑ even C22-C38)
Bush and McInerney, 2015	RTB008-S1	Itasca State Park, Old Pioneer Cemetery	47.2303	-95.1962		4.09625	680.25	September	0.02	0.08													Microwave, DCM:MeOH			1.73652	31	19-37	29.3603	∑Ci x i/ ∑Ci , i=21-39	4.15026	(∑ odd C21-C37) + (∑ odd C23-C39) / (∑ even C22-C38)
Bush and McInerney, 2015	RTB009-S1	Itasca State Park, Two Spot Trail	47.1955	-95.2581		3.99875	680.53	September	0.02	0.08													Microwave, DCM:MeOH			4.93206	31	17-37	28.9659	∑Ci x i/ ∑Ci , i=21-39	7.95924	(∑ odd C21-C37) + (∑ odd C23-C39) / (∑ even C22-C38)
Bush and McInerney, 2015	RTB010-S1	Glendalough State Park	46.3179	-95.6753		5.42375	655.08	September	0.02	0.08													Microwave, DCM:MeOH			1.10292	31	19-35	28.23	∑Ci x i/ ∑Ci , i=21-39	3.6345	(∑ odd C21-C37) + (∑ odd C23-C39) / (∑ even C22-C38)
Bush and McInerney, 2015	RTB011-S1	Inspiration Peak	46.1379	-95.5766		5.22625	667.71	September	0.02	0.08													Microwave, DCM:MeOH			2.15556	29	17-39	28.5712	∑Ci x i/ ∑Ci , i=21-39	4.30564	(∑ odd C21-C37) + (∑ odd C23-C39) / (∑ even C22-C38)
Bush and McInerney, 2015	RTB012-S1	Glacial Lakes State Park	45.5371	-95.5199		6.17833	670.1	September	0.02	0.08													Microwave, DCM:MeOH			2.05834	29	19-35	28.6141	∑Ci x i/ ∑Ci , i=21-39	4.09187	(∑ odd C21-C37) + (∑ odd C23-C39) / (∑ even C22-C38)
Bush and McInerney, 2015	RTB013-S1	Six Mile Grove Lutheran Cemetery	45.2525	-95.6665		6.53625	676.77	September	0.02	0.08													Microwave, DCM:MeOH			3.38184	31	19-37	30.4062	∑Ci x i/ ∑Ci , i=21-39	8.29081	(∑ odd C21-C37) + (∑ odd C23-C39) / (∑ even C22-C38)
Bush and McInerney, 2015	RTB014-S1	Upper Sioux Agency State Park	44.7315	-95.4431		6.78375	659.34	September	0.02	0.08													Microwave, DCM:MeOH			0.448387	29	19-35	28.4243	∑Ci x i/ ∑Ci , i=21-39	3.87581	(∑ odd C21-C37) + (∑ odd C23-C39) / (∑ even C22-C38)
Bush and McInerney, 2015	RTB015-S1	Camden State Park	44.3488	-95.9205		6.91875	691.56	September	0.02	0.08													Microwave, DCM:MeOH			3.63455	31	17-39	30.2418	∑Ci x i/ ∑Ci , i=21-39	5.77431	(∑ odd C21-C37) + (∑ odd C23-C39) / (∑ even C22-C38)
Bush and McInerney, 2015	RTB016-S1	St. Joseph Cemetery	43.8499	-96.4376		7.12083	689.54	September	0.02	0.08													Microwave, DCM:MeOH			2.63249	31	19-39	30.459	∑Ci x i/ ∑Ci , i=21-39	6.6545	(∑ odd C21-C37) + (∑ odd C23-C39) / (∑ even C22-C38)
Bush and McInerney, 2015	RTB017-S1	Split Rock Creek State Park	43.8946	-96.3669		7.0075	683.82	September	0.02	0.08													Microwave, DCM:MeOH			3.05254	31	17-39	30.0647	∑Ci x i/ ∑Ci , i=21-39	5.94936	(∑ odd C21-C37) + (∑ odd C23-C39) / (∑ even C22-C38)
Bush and McInerney, 2015	RTB018-S1	Pallisades State Park	43.6883	-96.5214		7.48083	690.75	September	0.02	0.08													Microwave, DCM:MeOH			6.5894	29	19-39	30.2234	∑Ci x i/ ∑Ci , i=21-39	10.0195	(∑ odd C21-C37) + (∑ odd C23-C39) / (∑ even C22-C38)
Bush and McInerney, 2015	RTB019-S1	Newton Hills State Park	43.2187	-96.5781		7.89792	675.69	September	0.02	0.08													Microwave, DCM:MeOH			2.90412	29	17-39	29.5682	∑Ci x i/ ∑Ci , i=21-39	5.44873	(∑ odd C21-C37) + (∑ odd C23-C39) / (∑ even C22-C38)
Bush and McInerney, 2015	RTB020-S1	Union Grove State Park	42.9214	-96.7745		8.73625	697.5	September	0.02	0.08													Microwave, DCM:MeOH			1.98929	31	18-39	29.8975	∑Ci x i/ ∑Ci , i=21-39	3.99488	(∑ odd C21-C37) + (∑ odd C23-C39) / (∑ even C22-C38)
Bush and McInerney, 2015	RTB021-S1	Clay Point Cemetery	42.8987	-96.9066		8.97292	688.12	September	0.02	0.08													Microwave, DCM:MeOH			5.38591	31	17-37	30.1431	∑Ci x i/ ∑Ci , i=21-39	6.80055	(∑ odd C21-C37) + (∑ odd C23-C39) / (∑ even C22-C38)
Bush and McInerney, 2015	RTB022-S1	Thabor Cemetery	42.51	-97.5666		9.22792	703.17	September	0.02	0.08													Microwave, DCM:MeOH			5.22451	31	19-39	30.5075	∑Ci x i/ ∑Ci , i=21-39	7.96477	(∑ odd C21-C37) + (∑ odd C23-C39) / (∑ even C22-C38)
Bush and McInerney, 2015	RTB023-S1	Redwing SWMA	42.148	-98.0992		9.19458	681.58	September	0.02	0.08													Microwave, DCM:MeOH			1.88028	31	20-39	30.4217	∑Ci x i/ ∑Ci , i=21-39	4.83053	(∑ odd C21-C37) + (∑ odd C23-C39) / (∑ even C22-C38)
Bush and McInerney, 2015	RTB024-S1	Redwing SWMA	42.1476	-98.1		9.19458	681.58	September	0.02	0.08													Microwave, DCM:MeOH			1.59207	31	19-39	30.2375	∑Ci x i/ ∑Ci , i=21-39	4.3418	(∑ odd C21-C37) + (∑ odd C23-C39) / (∑ even C22-C38)
Bush and McInerney, 2015	RTB025-S1	Mount Pleasant Cemetery	41.8569	-98.0936		9.17125	691.45	September	0.02	0.08													Microwave, DCM:MeOH			5.95847	31	17-39	30.2137	∑Ci x i/ ∑Ci , i=21-39	5.977	(∑ odd C21-C37) + (∑ odd C23-C39) / (∑ even C22-C38)
Bush and McInerney, 2015	RTB026-S1	Davis Creek SWMA	41.45	-98.7691		9.6425	654.31	September	0.02	0.08													Microwave, DCM:MeOH			1.67981	31	19-39	30.5256	∑Ci x i/ ∑Ci , i=21-39	4.836	(∑ odd C21-C37) + (∑ odd C23-C39) / (∑ even C22-C38)
Bush and McInerney, 2015	RTB027-S1	Loup Junction SWMA	41.2684	-98.4136		10.2617	669.66	September	0.02	0.08													Microwave, DCM:MeOH			1.77331	31	19-39	29.8531	∑Ci x i/ ∑Ci , i=21-39	5.13347	(∑ odd C21-C37) + (∑ odd C23-C39) / (∑ even C22-C38)
Bush and McInerney, 2015	RTB028-S1	Majors Cemetery	40.9275	-98.99		10.065	655.54	September	0.02	0.08													Microwave, DCM:MeOH			3.96383	33	22-39	31.365	∑Ci x i/ ∑Ci , i=21-39	7.75509	(∑ odd C21-C37) + (∑ odd C23-C39) / (∑ even C22-C38)
Bush and McInerney, 2015	RTB029-S1	Fort Kearney State Recreational Area	40.653	-98.9882		10.3713	647.13	September	0.02	0.08													Microwave, DCM:MeOH			2.16259	29	19-39	29.8286	∑Ci x i/ ∑Ci , i=21-39	6.21115	(∑ odd C21-C37) + (∑ odd C23-C39) / (∑ even C22-C38)
Bush and McInerney, 2015	RTB030-S1	Trinity-St. Peter's Lutheran Cemetery	40.3276	-99.0473		10.5437	641.86	September	0.02	0.08													Microwave, DCM:MeOH			0.846877	33	21-39	31.0741	∑Ci x i/ ∑Ci , i=21-39	4.64949	(∑ odd C21-C37) + (∑ odd C23-C39) / (∑ even C22-C38)
Bush and McInerney, 2015	RTB031-S1	Limestone Bluffs SWMA	40.004	-98.8866		10.8	651.85	September	0.02	0.08													Microwave, DCM:MeOH			0.762827	31	19-37	29.3451	∑Ci x i/ ∑Ci , i=21-39	3.80784	(∑ odd C21-C37) + (∑ odd C23-C39) / (∑ even C22-C38)
Bush and McInerney, 2015	RTB032-S1	Reamsville Cemetery	39.9436	-98.8594		10.9487	651.53	September	0.02	0.08													Microwave, DCM:MeOH			4.43402	33	17-37	31.2494	∑Ci x i/ ∑Ci , i=21-39	6.49175	(∑ odd C21-C37) + (∑ odd C23-C39) / (∑ even C22-C38)
Bush and McInerney, 2015	RTB033-S1	Hammond Cemetery	39.5897	-98.7468		11.7658	614.39	September	0.02	0.08													Microwave, DCM:MeOH			2.66399	31	17-39	30.1908	∑Ci x i/ ∑Ci , i=21-39	5.07134	(∑ odd C21-C37) + (∑ odd C23-C39) / (∑ even C22-C38)
Bush and McInerney, 2015	RTB034-S1	Cole Cemetery	39.2356	-98.8059		12.0617	674.93	September	0.02	0.08													Microwave, DCM:MeOH			3.92235	31	18-39	30.2798	∑Ci x i/ ∑Ci , i=21-39	6.1387	(∑ odd C21-C37) + (∑ odd C23-C39) / (∑ even C22-C38)
Bush and McInerney, 2015	RTB035-S1	Schoenfeld Cemetery	38.6816	-98.8765		12.6771	653.2	September	0.02	0.08													Microwave, DCM:MeOH			6.19511	31	17-39	30.666	∑Ci x i/ ∑Ci , i=21-39	5.95702	(∑ odd C21-C37) + (∑ odd C23-C39) / (∑ even C22-C38)
Bush and McInerney, 2015	RTB036-S1	Mennonite Memorial Cemetery	38.3049	-98.9775		12.8417	651.25	September	0.02	0.08													Microwave, DCM:MeOH			2.77766	31	20-39	30.9101	∑Ci x i/ ∑Ci , i=21-39	7.54308	(∑ odd C21-C37) + (∑ odd C23-C39) / (∑ even C22-C38)
Bush and McInerney, 2015	RTB037-S1	Texas Lake WMA	37.6479	-98.9786		13.2296	681.04	September	0.02	0.08													Microwave, DCM:MeOH			0.950928	31	20-37	30.3106	∑Ci x i/ ∑Ci , i=21-39	5.27279	(∑ odd C21-C37) + (∑ odd C23-C39) / (∑ even C22-C38)
Bush and McInerney, 2015	RTB038-S1	Pratt Sandhills WMA	37.7331	-98.9972		13.1946	669.6	September	0.02	0.08													Microwave, DCM:MeOH			0.518882	31	21-37	30.4252	∑Ci x i/ ∑Ci , i=21-39	4.80429	(∑ odd C21-C37) + (∑ odd C23-C39) / (∑ even C22-C38)
Bush and McInerney, 2015	RTB039-S1	Wellsford Cemetery	37.6251	-99.0142		13.2067	678.79	September	0.02	0.08													Microwave, DCM:MeOH			1.20648	31	20-39	30.2084	∑Ci x i/ ∑Ci , i=21-39	4.94271	(∑ odd C21-C37) + (∑ odd C23-C39) / (∑ even C22-C38)
Bush and McInerney, 2015	RTB040-S1	Chinn Cemetery	37.4599	-98.9222		13.5754	732.37	September	0.02	0.08													Microwave, DCM:MeOH			1.31776	31	20-39	30.379	∑Ci x i/ ∑Ci , i=21-39	5.15307	(∑ odd C21-C37) + (∑ odd C23-C39) / (∑ even C22-C38)
Bush and McInerney, 2015	RTB041-S1	Alabaster Caverns State Park	36.6972	-99.1438		14.56	679.88	September	0.02	0.08													Microwave, DCM:MeOH			0.36527	39	18-39	31.7997	∑Ci x i/ ∑Ci , i=21-39	2.38063	(∑ odd C21-C37) + (∑ odd C23-C39) / (∑ even C22-C38)
Bush and McInerney, 2015	RTB042-S1	Freedom Cemetery	36.8344	-99.1145		14.4654	679.38	September	0.02	0.08													Microwave, DCM:MeOH			4.16404	31	19-39	30.1777	∑Ci x i/ ∑Ci , i=21-39	7.68699	(∑ odd C21-C37) + (∑ odd C23-C39) / (∑ even C22-C38)
Bush and McInerney, 2015	RTB043-S1	Little Sahara State Park	36.5312	-98.8805		14.8521	701.5	September	0.02	0.08													Microwave, DCM:MeOH			0.594157	31	20-37	30.2199	∑Ci x i/ ∑Ci , i=21-39	4.75449	(∑ odd C21-C37) + (∑ odd C23-C39) / (∑ even C22-C38)
Bush and McInerney, 2015	RTB044-S1	Persimmon Cemetery	36.2175	-99.2097		14.4075	673.24	September	0.02	0.08													Microwave, DCM:MeOH			5.73899	33	19-39	32.1772	∑Ci x i/ ∑Ci , i=21-39	6.8761	(∑ odd C21-C37) + (∑ odd C23-C39) / (∑ even C22-C38)
Bush and McInerney, 2015	RTB045-S1	Trail Cemetery	35.9574	-99.2927		14.6254	686.98	September	0.02	0.08													Microwave, DCM:MeOH			8.75617	33	18-39	31.8493	∑Ci x i/ ∑Ci , i=21-39	8.75545	(∑ odd C21-C37) + (∑ odd C23-C39) / (∑ even C22-C38)
Bush and McInerney, 2015	RTB046-S1	Black Kettle National Grassland	35.752	-99.7212		14.8746	670.19	September	0.02	0.08													Microwave, DCM:MeOH			3.40832	33	19-39	30.8613	∑Ci x i/ ∑Ci , i=21-39	6.72604	(∑ odd C21-C37) + (∑ odd C23-C39) / (∑ even C22-C38)
Bush and McInerney, 2015	RTB047-S1	Black Kettle National Grassland	35.7503	-99.7184		14.8746	670.19	September	0.02	0.08													Microwave, DCM:MeOH			1.51448	31	20-39	30.3258	∑Ci x i/ ∑Ci , i=21-39	4.73877	(∑ odd C21-C37) + (∑ odd C23-C39) / (∑ even C22-C38)
Bush and McInerney, 2015	RTB048-S1	Sayre-Doxey Cemetery	35.3124	-99.5959		15.5308	696.73	September	0.02	0.08													Microwave, DCM:MeOH			18.9608	33	18-39	32.2511	∑Ci x i/ ∑Ci , i=21-39	8.72188	(∑ odd C21-C37) + (∑ odd C23-C39) / (∑ even C22-C38)
Bush and McInerney, 2015	RTB049-S1	Whitehorse Cemetery	34.871	-99.6248		15.9896	712.59	September	0.02	0.08													Microwave, DCM:MeOH			1.91216	31	19-39	31.1202	∑Ci x i/ ∑Ci , i=21-39	5.22797	(∑ odd C21-C37) + (∑ odd C23-C39) / (∑ even C22-C38)
Bush and McInerney, 2015	RTB050-S1	Antioch Cemetery	34.4356	-99.7072		16.6179	687.21	September	0.02	0.08													Microwave, DCM:MeOH			18.1409	33	19-39	32.799	∑Ci x i/ ∑Ci , i=21-39	6.46703	(∑ odd C21-C37) + (∑ odd C23-C39) / (∑ even C22-C38)
Bush and McInerney, 2015	RTB051-S1	Copper Breaks State Park	34.1047	-99.7578		17.0175	692.48	September	0.02	0.08													Microwave, DCM:MeOH			0.775412	31	19-37	29.8207	∑Ci x i/ ∑Ci , i=21-39	4.84666	(∑ odd C21-C37) + (∑ odd C23-C39) / (∑ even C22-C38)
Bush and McInerney, 2015	RTB052-S1	Truscott Cemetery	33.745	-99.7995		17.3304	659.45	September	0.02	0.08													Microwave, DCM:MeOH			27.47	33	19-39	32.8441	∑Ci x i/ ∑Ci , i=21-39	5.9725	(∑ odd C21-C37) + (∑ odd C23-C39) / (∑ even C22-C38)
Bush and McInerney, 2015	RTB053-S1	Capron Cemetery	32.9826	-99.8825		17.8467	659.7	September	0.02	0.08													Microwave, DCM:MeOH			1.12593	29	19-39	29.4275	∑Ci x i/ ∑Ci , i=21-39	4.45445	(∑ odd C21-C37) + (∑ odd C23-C39) / (∑ even C22-C38)
Bush and McInerney, 2015	RTB054-S1	Buffalo Gap Cemetery	32.2654	-99.8535		17.7162	663.61	September	0.02	0.08													Microwave, DCM:MeOH			3.31621	31	19-39	30.7538	∑Ci x i/ ∑Ci , i=21-39	6.52469	(∑ odd C21-C37) + (∑ odd C23-C39) / (∑ even C22-C38)
Bush and McInerney, 2015	RTB055-S1	Abilene State Park	32.233	-99.8832		17.7133	668.69	September	0.02	0.08													Microwave, DCM:MeOH			3.88399	31	18-39	30.36	∑Ci x i/ ∑Ci , i=21-39	5.97412	(∑ odd C21-C37) + (∑ odd C23-C39) / (∑ even C22-C38)
Bush and McInerney, 2015	RTB055-S2	Abilene State Park	32.233	-99.8832		17.7133	668.69	September	0.02	0.08													Microwave, DCM:MeOH			8.88956	29	17-39	30.2214	∑Ci x i/ ∑Ci , i=21-39	6.19337	(∑ odd C21-C37) + (∑ odd C23-C39) / (∑ even C22-C38)
Bush and McInerney, 2015	RTB056-S1	Fort Chadbourne Cemetery	32.04	-100.251		17.8	567.13	September	0.02	0.08													Microwave, DCM:MeOH			1.27238	31	19-39	30.4193	∑Ci x i/ ∑Ci , i=21-39	4.70792	(∑ odd C21-C37) + (∑ odd C23-C39) / (∑ even C22-C38)
Bush and McInerney, 2015	RTB057-S1	San Angelo State Park, South	31.4662	-100.517		18.3412	559.12	September	0.02	0.08													Microwave, DCM:MeOH			3.0171	31	19-39	30.7603	∑Ci x i/ ∑Ci , i=21-39	5.69293	(∑ odd C21-C37) + (∑ odd C23-C39) / (∑ even C22-C38)
Bush and McInerney, 2015	RTB058-S1	Paint Rock Cemetery	31.4976	-99.9173		18.7733	636.54	September	0.02	0.08													Microwave, DCM:MeOH			4.26293	31	19-39	30.1378	∑Ci x i/ ∑Ci , i=21-39	6.14771	(∑ odd C21-C37) + (∑ odd C23-C39) / (∑ even C22-C38)
Bush and McInerney, 2015	RTB059-S1	Fort McKavett Cemetery	30.8227	-100.118		18.2725	613.8	September	0.02	0.08													Microwave, DCM:MeOH			4.32393	31	18-39	30.5628	∑Ci x i/ ∑Ci , i=21-39	5.86357	(∑ odd C21-C37) + (∑ odd C23-C39) / (∑ even C22-C38)
Bush and McInerney, 2015	RTB060-S1	South Llano River State Park	30.4386	-99.8042		18.4217	605.02	September	0.02	0.08													Microwave, DCM:MeOH			2.92479	33	20-39	31.0582	∑Ci x i/ ∑Ci , i=21-39	6.26091	(∑ odd C21-C37) + (∑ odd C23-C39) / (∑ even C22-C38)
Bush and McInerney, 2015	RTB061-S1	Rocksprings Cemetery	30.0212	-100.2		18.4458	636.49	September	0.02	0.08													Microwave, DCM:MeOH			6.65391	31	17-39	31.1568	∑Ci x i/ ∑Ci , i=21-39	6.03279	(∑ odd C21-C37) + (∑ odd C23-C39) / (∑ even C22-C38)
Bush and McInerney, 2015	RTB062-S1	Kickapoo Caverns State Park	29.6338	-100.441		19.6675	602.29	September	0.02	0.08													Microwave, DCM:MeOH			8.64557	31	17-39	30.6675	∑Ci x i/ ∑Ci , i=21-39	5.03919	(∑ odd C21-C37) + (∑ odd C23-C39) / (∑ even C22-C38)
Bush and McInerney, 2015	RTB063-S1	Concan Cemetery	29.4807	-99.6903		19.6542	735.67	September	0.02	0.08													Microwave, DCM:MeOH			3.68566	35	19-39	32.1605	∑Ci x i/ ∑Ci , i=21-39	5.61929	(∑ odd C21-C37) + (∑ odd C23-C39) / (∑ even C22-C38)
Bush and McInerney, 2015	RTB064-S1	Frio Town Cemetery	29.0163	-99.3098		21.3529	656.99	September	0.02	0.08													Microwave, DCM:MeOH			4.26074	31	18-39	30.746	∑Ci x i/ ∑Ci , i=21-39	5.75062	(∑ odd C21-C37) + (∑ odd C23-C39) / (∑ even C22-C38)
Bush and McInerney, 2015	RTB065-S1	Choke Canyon State Park	28.4798	-98.3451		22.0004	655.09	September	0.02	0.08													Microwave, DCM:MeOH			1.3462	31	20-39	30.6895	∑Ci x i/ ∑Ci , i=21-39	5.29949	(∑ odd C21-C37) + (∑ odd C23-C39) / (∑ even C22-C38)
Bush and McInerney, 2015	RTB066-S1	Rosita/Peña Cemetery	27.7832	-98.4222		22.3317	599.13	September	0.02	0.08													Microwave, DCM:MeOH			1.81709	33	20-39	31.7517	∑Ci x i/ ∑Ci , i=21-39	5.06538	(∑ odd C21-C37) + (∑ odd C23-C39) / (∑ even C22-C38)
Bush and McInerney, 2015	RTB067-S1	Pedro Garza Zamora Cemetery	27.2264	-98.09		22.67	609.85	September	0.02	0.08													Microwave, DCM:MeOH			1.60288	31	18-39	30.8539	∑Ci x i/ ∑Ci , i=21-39	4.40266	(∑ odd C21-C37) + (∑ odd C23-C39) / (∑ even C22-C38)
Bush and McInerney, 2015	RTB068-S1	Resaca de las Palmas State Park	25.996	-97.5618		23.4454	674.43	September	0.02	0.08													Microwave, DCM:MeOH			0.512512	31	20-39	30.4393	∑Ci x i/ ∑Ci , i=21-39	3.51844	(∑ odd C21-C37) + (∑ odd C23-C39) / (∑ even C22-C38)
Bush and McInerney, 2015	RTB069-S1	Sabal Palm Sanctuary	25.8504	-97.4185		23.4292	690.07	September	0.02	0.08													Microwave, DCM:MeOH			2.31428	31	19-39	30.1912	∑Ci x i/ ∑Ci , i=21-39	3.56674	(∑ odd C21-C37) + (∑ odd C23-C39) / (∑ even C22-C38)
Bush and McInerney, 2015	RTB070-S1	Sabal Palm Sanctuary	25.8553	-97.4173		23.4137	691.02	September	0.02	0.08													Microwave, DCM:MeOH			1.27014	33	19-39	30.7658	∑Ci x i/ ∑Ci , i=21-39	4.74164	(∑ odd C21-C37) + (∑ odd C23-C39) / (∑ even C22-C38)
Bush and McInerney, 2015	RTB002-BEPA	Koochiching State Forest	48.5989	-93.2332		3.29542	677.03	September				Fresh material										Betula papyrifera	Microwave, DCM:MeOH			250.246	27	17-35	28.1184	∑Ci x i/ ∑Ci , i=21-39	5.33017	(∑ odd C21-C37) + (∑ odd C23-C39) / (∑ even C22-C38)
Bush and McInerney, 2015	RTB002-FRPE	Koochiching State Forest	48.5989	-93.2332		3.29542	677.03	September				Fresh material										Fraxinus pennsylvanica	Microwave, DCM:MeOH			319.445	31	17-37	29.9063	∑Ci x i/ ∑Ci , i=21-39	3.01549	(∑ odd C21-C37) + (∑ odd C23-C39) / (∑ even C22-C38)
Bush and McInerney, 2015	RTB002-POTR	Koochiching State Forest	48.5989	-93.2332		3.29542	677.03	September				Fresh material										Populus tremuloides	Microwave, DCM:MeOH			451.418	27	17-37	26.3816	∑Ci x i/ ∑Ci , i=21-39	2.88715	(∑ odd C21-C37) + (∑ odd C23-C39) / (∑ even C22-C38)
Bush and McInerney, 2015	RTB003-ACSP	Gronwoldt Landing	48.1219	-93.6963		3.78708	680.63	September				Fresh material										Acer spicatum	Microwave, DCM:MeOH			512.035	31	19-35	30.6695	∑Ci x i/ ∑Ci , i=21-39	9.89761	(∑ odd C21-C37) + (∑ odd C23-C39) / (∑ even C22-C38)
Bush and McInerney, 2015	RTB003-ARsp.	Gronwoldt Landing	48.1219	-93.6963		3.78708	680.63	September				Fresh material										Arnica sp.	Microwave, DCM:MeOH			513.798	31	18-38	30.8379	∑Ci x i/ ∑Ci , i=21-39	7.9737	(∑ odd C21-C37) + (∑ odd C23-C39) / (∑ even C22-C38)
Bush and McInerney, 2015	RTB003-BEPA	Gronwoldt Landing	48.1219	-93.6963		3.78708	680.63	September				Fresh material										Betula papyrifera	Microwave, DCM:MeOH			61.4347	27	17-37	27.3181	∑Ci x i/ ∑Ci , i=21-39	2.05703	(∑ odd C21-C37) + (∑ odd C23-C39) / (∑ even C22-C38)
Bush and McInerney, 2015	RTB005-BEPA	Lake Bemidji State Park	47.5415	-94.8233		4.20375	642.76	September				Fresh material										Betula papyrifera	Microwave, DCM:MeOH			335.623	29	18-35	28.9452	∑Ci x i/ ∑Ci , i=21-39	9.12344	(∑ odd C21-C37) + (∑ odd C23-C39) / (∑ even C22-C38)
Bush and McInerney, 2015	RTB005-CORU	Lake Bemidji State Park	47.5415	-94.8233		4.20375	642.76	September				Fresh material										Cornus rugosa	Microwave, DCM:MeOH			92.9159	29	18-37	28.0542	∑Ci x i/ ∑Ci , i=21-39	3.41872	(∑ odd C21-C37) + (∑ odd C23-C39) / (∑ even C22-C38)
Bush and McInerney, 2015	RTB005-POGR	Lake Bemidji State Park	47.5415	-94.8233		4.20375	642.76	September				Fresh material										Populus grandidentata	Microwave, DCM:MeOH			427.076	27	17-37	26.9494	∑Ci x i/ ∑Ci , i=21-39	4.66942	(∑ odd C21-C37) + (∑ odd C23-C39) / (∑ even C22-C38)
Bush and McInerney, 2015	RTB005-QURU	Lake Bemidji State Park	47.5415	-94.8233		4.20375	642.76	September				Fresh material										Quercus rubra	Microwave, DCM:MeOH			248.304	29	18-37	28.8144	∑Ci x i/ ∑Ci , i=21-39	6.05281	(∑ odd C21-C37) + (∑ odd C23-C39) / (∑ even C22-C38)
Bush and McInerney, 2015	RTB009-ACSA	Itasca State Park, Two Spot Trail	47.1955	-95.2581		3.99875	680.53	September				Fresh material										Acer saccharum	Microwave, DCM:MeOH			236.812	31	17-35	29.2088	∑Ci x i/ ∑Ci , i=21-39	6.13854	(∑ odd C21-C37) + (∑ odd C23-C39) / (∑ even C22-C38)
Bush and McInerney, 2015	RTB009-BEPA	Itasca State Park, Two Spot Trail	47.1955	-95.2581		3.99875	680.53	September				Fresh material										Betula papyrifera	Microwave, DCM:MeOH			164.143	29	17-35	28.9762	∑Ci x i/ ∑Ci , i=21-39	6.37	(∑ odd C21-C37) + (∑ odd C23-C39) / (∑ even C22-C38)
Bush and McInerney, 2015	RTB010-ANGE	Glendalough State Park	46.3179	-95.6753		5.42375	655.08	September				Fresh material										Andropogon gerardii	Microwave, DCM:MeOH			304.53	31	19-37	29.3457	∑Ci x i/ ∑Ci , i=21-39	6.05309	(∑ odd C21-C37) + (∑ odd C23-C39) / (∑ even C22-C38)
Bush and McInerney, 2015	RTB010-BRsp.	Glendalough State Park	46.3179	-95.6753		5.42375	655.08	September				Fresh material										Bromus sp.	Microwave, DCM:MeOH			345.396	31	19-35	29.6357	∑Ci x i/ ∑Ci , i=21-39	8.83399	(∑ odd C21-C37) + (∑ odd C23-C39) / (∑ even C22-C38)
Bush and McInerney, 2015	RTB010-FRPE	Glendalough State Park	46.3179	-95.6753		5.42375	655.08	September				Fresh material										Fraxinus pennsylvanica	Microwave, DCM:MeOH			544.488	31	18-35	30.122	∑Ci x i/ ∑Ci , i=21-39	5.79476	(∑ odd C21-C37) + (∑ odd C23-C39) / (∑ even C22-C38)
Bush and McInerney, 2015	RTB010-grass71	Glendalough State Park	46.3179	-95.6753		5.42375	655.08	September				Fresh material										POACEAE sp.	Microwave, DCM:MeOH			336.303	31	19-35	30.0941	∑Ci x i/ ∑Ci , i=21-39	7.6725	(∑ odd C21-C37) + (∑ odd C23-C39) / (∑ even C22-C38)
Bush and McInerney, 2015	RTB010-QUMA	Glendalough State Park	46.3179	-95.6753		5.42375	655.08	September				Fresh material										Quercus macrocarpa	Microwave, DCM:MeOH			237.396	25	18-36	26.9296	∑Ci x i/ ∑Ci , i=21-39	5.6249	(∑ odd C21-C37) + (∑ odd C23-C39) / (∑ even C22-C38)
Bush and McInerney, 2015	RTB011-FRPE	Inspiration Peak	46.1379	-95.5766		5.22625	667.71	September				Fresh material										Fraxinus pennsylvanica	Microwave, DCM:MeOH			537.844	31	19-37	29.7868	∑Ci x i/ ∑Ci , i=21-39	4.4673	(∑ odd C21-C37) + (∑ odd C23-C39) / (∑ even C22-C38)
Bush and McInerney, 2015	RTB011-OSVI	Inspiration Peak	46.1379	-95.5766		5.22625	667.71	September				Fresh material										Ostrya virginiana	Microwave, DCM:MeOH			85.5541	29	17-37	27.6304	∑Ci x i/ ∑Ci , i=21-39	2.58534	(∑ odd C21-C37) + (∑ odd C23-C39) / (∑ even C22-C38)
Bush and McInerney, 2015	RTB011-QUMA	Inspiration Peak	46.1379	-95.5766		5.22625	667.71	September				Fresh material										Quercus macrocarpa	Microwave, DCM:MeOH			130.383	29	17-35	27.881	∑Ci x i/ ∑Ci , i=21-39	4.65042	(∑ odd C21-C37) + (∑ odd C23-C39) / (∑ even C22-C38)
Bush and McInerney, 2015	RTB012-CEOC	Glacial Lakes State Park	45.5371	-95.5199		6.17833	670.1	September				Fresh material										Celtis occidentalis	Microwave, DCM:MeOH			341.404	29	17-35	29.2815	∑Ci x i/ ∑Ci , i=21-39	8.16722	(∑ odd C21-C37) + (∑ odd C23-C39) / (∑ even C22-C38)
Bush and McInerney, 2015	RTB014-SCSC	Upper Sioux Agency State Park	44.7315	-95.4431		6.78375	659.34	September				Fresh material										Schizachyrium scoparium	Microwave, DCM:MeOH			83.8098	27	19-35	28.2928	∑Ci x i/ ∑Ci , i=21-39	2.92561	(∑ odd C21-C37) + (∑ odd C23-C39) / (∑ even C22-C38)
Bush and McInerney, 2015	RTB018-CEOC	Pallisades State Park	43.6883	-96.5214		7.48083	690.75	September				Fresh material										Celtis occidentalis	Microwave, DCM:MeOH			80.0784	29	16-35	28.9891	∑Ci x i/ ∑Ci , i=21-39	4.46965	(∑ odd C21-C37) + (∑ odd C23-C39) / (∑ even C22-C38)
Bush and McInerney, 2015	RTB019-OSVI	Newton Hills State Park	43.2187	-96.5781		7.89792	675.69	September				Fresh material										Ostrya virginiana	Microwave, DCM:MeOH			196	29	18-35	28.5595	∑Ci x i/ ∑Ci , i=21-39	5.64041	(∑ odd C21-C37) + (∑ odd C23-C39) / (∑ even C22-C38)
Bush and McInerney, 2015	RTB019-QUMA	Newton Hills State Park	43.2187	-96.5781		7.89792	675.69	September				Fresh material										Quercus macrocarpa	Microwave, DCM:MeOH			137.369	29	17-33	28.0029	∑Ci x i/ ∑Ci , i=21-39	6.10853	(∑ odd C21-C37) + (∑ odd C23-C39) / (∑ even C22-C38)
Bush and McInerney, 2015	RTB019-TIAM	Newton Hills State Park	43.2187	-96.5781		7.89792	675.69	September				Fresh material										Tilia americana	Microwave, DCM:MeOH			469.467	31	18-35	29.656	∑Ci x i/ ∑Ci , i=21-39	4.12766	(∑ odd C21-C37) + (∑ odd C23-C39) / (∑ even C22-C38)
Bush and McInerney, 2015	RTB023-BOGR	Redwing SWMA	42.148	-98.0992		9.19458	681.58	September				Fresh material										Bouteloua gracilis	Microwave, DCM:MeOH			316.846	31	20-35	30.8308	∑Ci x i/ ∑Ci , i=21-39	6.489	(∑ odd C21-C37) + (∑ odd C23-C39) / (∑ even C22-C38)
Bush and McInerney, 2015	RTB024-FRPE	Redwing SWMA	42.1476	-98.1		9.19458	681.58	September				Fresh material										Fraxinus pennsylvanica	Microwave, DCM:MeOH			449.838	31	18-35	30.1037	∑Ci x i/ ∑Ci , i=21-39	5.5736	(∑ odd C21-C37) + (∑ odd C23-C39) / (∑ even C22-C38)
Bush and McInerney, 2015	RTB028-CEOC	Majors Cemetery	40.9275	-98.99		10.065	655.54	September				Fresh material										Celtis occidentalis	Microwave, DCM:MeOH			141.212	29	17-35	28.764	∑Ci x i/ ∑Ci , i=21-39	3.92998	(∑ odd C21-C37) + (∑ odd C23-C39) / (∑ even C22-C38)
Bush and McInerney, 2015	RTB030-BOGR	Trinity-St. Peter's Lutheran Cemetery	40.3276	-99.0473		10.5437	641.86	September				Fresh material										Bouteloua gracilis	Microwave, DCM:MeOH			786.81	31	19-37	31.2133	∑Ci x i/ ∑Ci , i=21-39	10.1554	(∑ odd C21-C37) + (∑ odd C23-C39) / (∑ even C22-C38)
Bush and McInerney, 2015	RTB031-PRAM	Limestone Bluffs SWMA	40.004	-98.8866		10.8	651.85	September				Fresh material										Prunus americana	Microwave, DCM:MeOH			7114.67	31	19-34	30.0016	∑Ci x i/ ∑Ci , i=21-39	14.8759	(∑ odd C21-C37) + (∑ odd C23-C39) / (∑ even C22-C38)
Bush and McInerney, 2015	RTB033-BOGR	Hammond Cemetery	39.5897	-98.7468		11.7658	614.39	September				Fresh material										Bouteloua gracilis	Microwave, DCM:MeOH			255.704	31	19-37	30.5831	∑Ci x i/ ∑Ci , i=21-39	5.1952	(∑ odd C21-C37) + (∑ odd C23-C39) / (∑ even C22-C38)
Bush and McInerney, 2015	RTB034-BOGR	Cole Cemetery	39.2356	-98.8059		12.0617	674.93	September				Fresh material										Bouteloua gracilis	Microwave, DCM:MeOH			156.983	31	19-37	31.1922	∑Ci x i/ ∑Ci , i=21-39	4.86012	(∑ odd C21-C37) + (∑ odd C23-C39) / (∑ even C22-C38)
Bush and McInerney, 2015	RTB036-BOLA	Mennonite Memorial Cemetery	38.3049	-98.9775		12.8417	651.25	September				Fresh material										Bothriochloa laguroides	Microwave, DCM:MeOH			154.973	31	18-37	29.577	∑Ci x i/ ∑Ci , i=21-39	3.06576	(∑ odd C21-C37) + (∑ odd C23-C39) / (∑ even C22-C38)
Bush and McInerney, 2015	RTB038-aster93	Pratt Sandhills WMA	37.7331	-98.9972		13.1946	669.6	September				Fresh material										ASTERACEAE sp.	Microwave, DCM:MeOH			927.75	31	18-37	31.1099	∑Ci x i/ ∑Ci , i=21-39	3.66412	(∑ odd C21-C37) + (∑ odd C23-C39) / (∑ even C22-C38)
Bush and McInerney, 2015	RTB038-ERAN	Pratt Sandhills WMA	37.7331	-98.9972		13.1946	669.6	September				Fresh material										Eriogonum annuum	Microwave, DCM:MeOH			329.213	29	19-35	29.5156	∑Ci x i/ ∑Ci , i=21-39	8.65202	(∑ odd C21-C37) + (∑ odd C23-C39) / (∑ even C22-C38)
Bush and McInerney, 2015	RTB039-ULPU	Wellsford Cemetery	37.6251	-99.0142		13.2067	678.79	September				Fresh material										Ulmus pumila	Microwave, DCM:MeOH			96.214	29	16-37	29.162	∑Ci x i/ ∑Ci , i=21-39	5.17889	(∑ odd C21-C37) + (∑ odd C23-C39) / (∑ even C22-C38)
Bush and McInerney, 2015	RTB040-ANGE	Chinn Cemetery	37.4599	-98.9222		13.5754	732.37	September				Fresh material										Andropogon gerardii	Microwave, DCM:MeOH			426.337	27	19-39	28.7469	∑Ci x i/ ∑Ci , i=21-39	3.07046	(∑ odd C21-C37) + (∑ odd C23-C39) / (∑ even C22-C38)
Bush and McInerney, 2015	RTB041-BOGR	Alabaster Caverns State Park	36.6972	-99.1438		14.56	679.88	September				Fresh material										Bouteloua gracilis	Microwave, DCM:MeOH			226.601	31	19-39	30.8143	∑Ci x i/ ∑Ci , i=21-39	4.75703	(∑ odd C21-C37) + (∑ odd C23-C39) / (∑ even C22-C38)
Bush and McInerney, 2015	RTB041-ULCR	Alabaster Caverns State Park	36.6972	-99.1438		14.56	679.88	September				Fresh material										Ulmus crassifolia	Microwave, DCM:MeOH			129.038	29	17-37	28.9907	∑Ci x i/ ∑Ci , i=21-39	5.4936	(∑ odd C21-C37) + (∑ odd C23-C39) / (∑ even C22-C38)
Bush and McInerney, 2015	RTB043-CELA	Little Sahara State Park	36.5312	-98.8805		14.8521	701.5	September				Fresh material										Celtis laevigata	Microwave, DCM:MeOH			3123.49	29	19-35	29.8941	∑Ci x i/ ∑Ci , i=21-39	16.7027	(∑ odd C21-C37) + (∑ odd C23-C39) / (∑ even C22-C38)
Bush and McInerney, 2015	RTB043-PAsp.	Little Sahara State Park	36.5312	-98.8805		14.8521	701.5	September				Fresh material										Panicum sp.	Microwave, DCM:MeOH			172.627	31	19-35	31.3232	∑Ci x i/ ∑Ci , i=21-39	8.05906	(∑ odd C21-C37) + (∑ odd C23-C39) / (∑ even C22-C38)
Bush and McInerney, 2015	RTB043-ULCR	Little Sahara State Park	36.5312	-98.8805		14.8521	701.5	September				Fresh material										Ulmus crassifolia	Microwave, DCM:MeOH			193.057	29	17-39	28.9478	∑Ci x i/ ∑Ci , i=21-39	5.31731	(∑ odd C21-C37) + (∑ odd C23-C39) / (∑ even C22-C38)
Bush and McInerney, 2015	RTB049-BOsp.	Whitehorse Cemetery	34.871	-99.6248		15.9896	712.59	September				Fresh material										Bothriochloa sp.	Microwave, DCM:MeOH			203.179	31	18-37	31.3638	∑Ci x i/ ∑Ci , i=21-39	6.59675	(∑ odd C21-C37) + (∑ odd C23-C39) / (∑ even C22-C38)
Bush and McInerney, 2015	RTB049-CHLI	Whitehorse Cemetery	34.871	-99.6248		15.9896	712.59	September				Fresh material										Chilopsis linearis	Microwave, DCM:MeOH			872.536	31	19-35	30.3699	∑Ci x i/ ∑Ci , i=21-39	6.78689	(∑ odd C21-C37) + (∑ odd C23-C39) / (∑ even C22-C38)
Bush and McInerney, 2015	RTB051-BOGR	Copper Breaks State Park	34.1047	-99.7578		17.0175	692.48	September				Fresh material										Bouteloua gracilis	Microwave, DCM:MeOH			426.84	33	19-37	31.7133	∑Ci x i/ ∑Ci , i=21-39	6.02444	(∑ odd C21-C37) + (∑ odd C23-C39) / (∑ even C22-C38)
Bush and McInerney, 2015	RTB051-CELA	Copper Breaks State Park	34.1047	-99.7578		17.0175	692.48	September				Fresh material										Celtis laevigata	Microwave, DCM:MeOH			556.028	31	18-35	30.5682	∑Ci x i/ ∑Ci , i=21-39	9.45805	(∑ odd C21-C37) + (∑ odd C23-C39) / (∑ even C22-C38)
Bush and McInerney, 2015	RTB051-PRGL	Copper Breaks State Park	34.1047	-99.7578		17.0175	692.48	September				Fresh material										Prosopis glandulosa	Microwave, DCM:MeOH			432.111	29	19-33	28.271	∑Ci x i/ ∑Ci , i=21-39	7.69862	(∑ odd C21-C37) + (∑ odd C23-C39) / (∑ even C22-C38)
Bush and McInerney, 2015	RTB057-PRGL	San Angelo State Park, South	31.4662	-100.517		18.3412	559.12	September				Fresh material										Prosopis glandulosa	Microwave, DCM:MeOH			330.331	29	18-35	28.1084	∑Ci x i/ ∑Ci , i=21-39	8.82238	(∑ odd C21-C37) + (∑ odd C23-C39) / (∑ even C22-C38)
Bush and McInerney, 2015	RTB060-BETR	South Llano River State Park	30.4386	-99.8042		18.4217	605.02	September				Fresh material										Berberis trifoliata	Microwave, DCM:MeOH			352.07	31	19-35	30.6435	∑Ci x i/ ∑Ci , i=21-39	6.71783	(∑ odd C21-C37) + (∑ odd C23-C39) / (∑ even C22-C38)
Bush and McInerney, 2015	RTB060-CELA	South Llano River State Park	30.4386	-99.8042		18.4217	605.02	September				Fresh material										Celtis laevigata	Microwave, DCM:MeOH			362.757	31	18-35	30.1845	∑Ci x i/ ∑Ci , i=21-39	7.76321	(∑ odd C21-C37) + (∑ odd C23-C39) / (∑ even C22-C38)
Bush and McInerney, 2015	RTB060-PRGL	South Llano River State Park	30.4386	-99.8042		18.4217	605.02	September				Fresh material										Prosopis glandulosa	Microwave, DCM:MeOH			189.826	29	17-33	28.0855	∑Ci x i/ ∑Ci , i=21-39	6.18192	(∑ odd C21-C37) + (∑ odd C23-C39) / (∑ even C22-C38)
Bush and McInerney, 2015	RTB068-CELA	Resaca de las Palmas State Park	25.996	-97.5618		23.4454	674.43	September				Fresh material										Celtis laevigata	Microwave, DCM:MeOH			1046.4	31	19-35	30.6275	∑Ci x i/ ∑Ci , i=21-39	11.7777	(∑ odd C21-C37) + (∑ odd C23-C39) / (∑ even C22-C38)
Bush and McInerney, 2015	RTB068-PRGL	Resaca de las Palmas State Park	25.996	-97.5618		23.4454	674.43	September				Fresh material										Prosopis glandulosa	Microwave, DCM:MeOH			172.22	29	17-35	28.2947	∑Ci x i/ ∑Ci , i=21-39	5.28483	(∑ odd C21-C37) + (∑ odd C23-C39) / (∑ even C22-C38)
Celerier et al., 2009		Mignaloux-Beauvoir, France	46.5569	0.410969					0	0.05	A1		Luvic Cambisol	7.7	42.3	48	9.7	11.6		1.37	Grassland		ASE, DCM:MeOH	0.056		12.74		19-35			12.8	exact formula not reported, used chain lengths 25-33
Celerier et al., 2009		Mignaloux-Beauvoir, France	46.5569	0.410969					0.05	0.2	A2		Luvic Cambisol	6.4	40.4	47.5	12.1	10.3		0.951	Grassland		ASE, DCM:MeOH	0.024		13.35		19-35			10.2	exact formula not reported, used chain lengths 25-33
Celerier et al., 2009		Mignaloux-Beauvoir, France	46.5569	0.410969					0.2	0.3	B		Luvic Cambisol	6.9	31.4	47	21.6	8.91		0.397	Grassland		ASE, DCM:MeOH	0.007		6.2		19-35			7.1	exact formula not reported, used chain lengths 25-33
Chikaraishi and Naraoka, 2006		Lake Haruna, Japan	36.4667	138.867				Spring				Fresh material										Acer argutum	Sonicated, CH2Cl2:CH3OH			771	31	25-35			17.3	CPI=ΣRA(odd carbon-numbered homologues) /ΣRA(even carbon-numbered homologues)
Chikaraishi and Naraoka, 2006		Lake Haruna, Japan	36.4667	138.867				Autumn				Senescent material										Acer argutum	Sonicated, CH2Cl2:CH3OH			239					17.3	CPI=ΣRA(odd carbon-numbered homologues) /ΣRA(even carbon-numbered homologues)
Chikaraishi and Naraoka, 2006		Lake Haruna, Japan	36.4667	138.867				Spring				Litter										Acer argutum	Sonicated, CH2Cl2:CH3OH			220	29	25-33			8.5	CPI=ΣRA(odd carbon-numbered homologues) /ΣRA(even carbon-numbered homologues)
Chikaraishi and Naraoka, 2006		Lake Haruna, Japan	36.4667	138.867				Spring				Fresh material										Acer carpinifolium	Sonicated, CH2Cl2:CH3OH			744					17.3	CPI=ΣRA(odd carbon-numbered homologues) /ΣRA(even carbon-numbered homologues)
Chikaraishi and Naraoka, 2006		Lake Haruna, Japan	36.4667	138.867				Autumn				Senescent material										Acer carpinifolium	Sonicated, CH2Cl2:CH3OH			479					17.3	CPI=ΣRA(odd carbon-numbered homologues) /ΣRA(even carbon-numbered homologues)
Chikaraishi and Naraoka, 2006		Lake Haruna, Japan	36.4667	138.867				Spring				Litter										Acer carpinifolium	Sonicated, CH2Cl2:CH3OH			145					8.5	CPI=ΣRA(odd carbon-numbered homologues) /ΣRA(even carbon-numbered homologues)
Chikaraishi and Naraoka, 2006		Lake Haruna, Japan	36.4667	138.867				Spring	0.02	0.1													Sonicated, CH2Cl2:CH3OH			5	29	23-35			9.1	CPI=ΣRA(odd carbon-numbered homologues) /ΣRA(even carbon-numbered homologues)
Chikaraishi and Naraoka, 2006		Lake Haruna, Japan	36.4667	138.867				Autumn	0.02	0.1													Sonicated, CH2Cl2:CH3OH			4					9.1	CPI=ΣRA(odd carbon-numbered homologues) /ΣRA(even carbon-numbered homologues)
Chikaraishi and Naraoka, 2006		Lake Haruna, Japan	36.4667	138.867				Spring	0.02	0.1													Sonicated, CH2Cl2:CH3OH			5					9.1	CPI=ΣRA(odd carbon-numbered homologues) /ΣRA(even carbon-numbered homologues)
Feng and Simpson, 2007; Otto et al., 2005		Lethbridge, Alberta, Canada	49.8659	-112.826			413		0	0.16	Ah		Brown Chernozem	6-6.9	47.3	32.6	20.1	12		2.08	Grassland		Sonicated, DCM:MeOH		22.2		27	24-31												3.8		6.7		5.9		5.8
Feng and Simpson, 2007; Otto et al., 2005		Lethbridge, Alberta, Canada	49.8659	-112.826			413		0.16	0.54	Bm		Brown Chernozem	6-6.9	46.6	26.3	27.1	7		0.99	Grassland		Sonicated, DCM:MeOH		70			24-33
Feng and Simpson, 2007; Otto et al., 2005		Lethbridge, Alberta, Canada	49.8659	-112.826			413		0.54		Cca		Brown Chernozem	6-6.9	35.8	28.6	35.6	9		0.93	Grassland		Sonicated, DCM:MeOH		290			24-33
Feng and Simpson, 2007; Otto et al., 2005		Lethbridge, Alberta, Canada	49.8659	-112.826					0	0.18	Ah		Dark brown chernozem	6-6.9	46.9	29.9	23.2	11		2.77	Grassland		Sonicated, DCM:MeOH		43.4		31	24-33												2.9		8.1		13.7		15.4		3.3
Feng and Simpson, 2007; Otto et al., 2005		Lethbridge, Alberta, Canada	49.8659	-112.826					0.18	0.61	Bm		Dark brown chernozem	6-6.9	42	28.5	29.5	10		1.82	Grassland		Sonicated, DCM:MeOH		180			24-33
Feng and Simpson, 2007; Otto et al., 2005		Lethbridge, Alberta, Canada	49.8659	-112.826					0.61		Cca		Dark brown chernozem	6-6.9	41.8	23.6	34.6	7		0.77	Grassland		Sonicated, DCM:MeOH		220			24-33
Feng and Simpson, 2007; Otto et al., 2005		Edmonton, Alberta, Canada	53.5677	-113.496			452		0	0.3	Ah		Black chernozem		44.1	29.4	26.5	13		4.41	Grassland		Sonicated, DCM:MeOH		26.5		31	24-33												2	0.5	3.6	1.1	6.3		8.4		4.6
Feng and Simpson, 2007; Otto et al., 2005		Edmonton, Alberta, Canada	53.5677	-113.496			452		0.3	0.7	Bm		Black chernozem		43.9	23	33.1	8		0.69	Grassland		Sonicated, DCM:MeOH		110			24-33
Feng and Simpson, 2007; Otto et al., 2005		Edmonton, Alberta, Canada	53.5677	-113.496			452		0.7		Cca		Black chernozem		43.9	22	34.1	9		0.66	Grassland		Sonicated, DCM:MeOH		90			24-33
Feng and Simpson, 2007; Otto et al., 2005		University of Alberta Ellerslie Research Station	53.4408	-113.547					0	0.28	Ah		Eluviated black chernozem		35	36.4	28.6	15		5.26	Grassland		Sonicated, DCM:MeOH		23		31	24-33												2		4.4		6.5		6.6		3.5
Feng and Simpson, 2007; Otto et al., 2005		University of Alberta Ellerslie Research Station	53.4408	-113.547					0.38	0.74	Bm		Eluviated black chernozem		34.5	19	46.5	7		0.52	Grassland		Sonicated, DCM:MeOH		40			24-33
Feng and Simpson, 2007; Otto et al., 2005		University of Alberta Ellerslie Research Station	53.4408	-113.547					0.74		Cca		Eluviated black chernozem		27.5	24	48.5	13		0.88	Grassland		Sonicated, DCM:MeOH		30			24-33
Ficken et al., 1998		Moine Mhor, Scotland	56.0887	-5.50996	950	5		November				Fresh material										Racomitrium lanuginosum	Sonicated, DCM:MeOH			45	31	19-35	30.2	∑Ci x i/ ∑Ci , i=23-33	9	2 x ∑odd C23-C31/∑even C22-C30 + ∑even C24-C32
Ficken et al., 1998		Moine Mhor, Scotland	56.0887	-5.50996	950	5		November				Fresh material										Sphagnum capillifolium	Sonicated, DCM:MeOH			184	31	19-35	27.6	∑Ci x i/ ∑Ci , i=23-33	11.2	2 x ∑odd C23-C31/∑even C22-C30 + ∑even C24-C32
Ficken et al., 1998		Moine Mhor, Scotland	56.0887	-5.50996	950	5		November				Fresh material										S. fuscum (moss)	Sonicated, DCM:MeOH			137	25	19-35	25.6	∑Ci x i/ ∑Ci , i=23-33	10.3	2 x ∑odd C23-C31/∑even C22-C30 + ∑even C24-C32
Ficken et al., 1998		Moine Mhor, Scotland	56.0887	-5.50996	950	5		November				Fresh material										H. selago (moss)	Sonicated, DCM:MeOH			53	29	19-35	28.9	∑Ci x i/ ∑Ci , i=23-33	2.9	2 x ∑odd C23-C31/∑even C22-C30 + ∑even C24-C32
Ficken et al., 1998		Moine Mhor, Scotland	56.0887	-5.50996	950	5		November				Fresh material										C. bigelowii (sedge)	Sonicated, DCM:MeOH			49	27	19-35	28.2	∑Ci x i/ ∑Ci , i=23-33	8.5	2 x ∑odd C23-C31/∑even C22-C30 + ∑even C24-C32
Ficken et al., 1998		Moine Mhor, Scotland	56.0887	-5.50996	950	5		November				Fresh material										V. vitis-idaea (ericaceae)	Sonicated, DCM:MeOH			88	29	19-35	28.5	∑Ci x i/ ∑Ci , i=23-33	8.2	2 x ∑odd C23-C31/∑even C22-C30 + ∑even C24-C32
Ficken et al., 1998		Moine Mhor, Scotland	56.0887	-5.50996	950	5		November				Fresh material										E. nigrum (ericaceae)	Sonicated, DCM:MeOH			853	31	19-35	30.3	∑Ci x i/ ∑Ci , i=23-33	21.8	2 x ∑odd C23-C31/∑even C22-C30 + ∑even C24-C32
Ficken et al., 1998		Moine Mhor, Scotland	56.0887	-5.50996	950	5		November				Fresh material										C. uncialis (lichen)	Sonicated, DCM:MeOH			69	31	19-35	30.2	∑Ci x i/ ∑Ci , i=23-33	7.4	2 x ∑odd C23-C31/∑even C22-C30 + ∑even C24-C32
Ficken et al., 1998		Moine Mhor, Scotland	56.0887	-5.50996	950	5		November				Fresh material										C. arbuscula (lichen)	Sonicated, DCM:MeOH			50	31	19-35	30	∑Ci x i/ ∑Ci , i=23-33	9.8	2 x ∑odd C23-C31/∑even C22-C30 + ∑even C24-C32
Ficken et al., 1998		Moine Mhor, Scotland	56.0887	-5.50996	950	5		November				Fresh material										S. globosus (lichen)	Sonicated, DCM:MeOH			97	31	19-35	30.3	∑Ci x i/ ∑Ci , i=23-33	5.7	2 x ∑odd C23-C31/∑even C22-C30 + ∑even C24-C32
Ficken et al., 1998		Moine Mhor, Scotland	56.0887	-5.50996	950	5		November				Fresh material										C. islandica (lichen)	Sonicated, DCM:MeOH			58	31	19-35	29.7	∑Ci x i/ ∑Ci , i=23-33	7.4	2 x ∑odd C23-C31/∑even C22-C30 + ∑even C24-C32
Ficken et al., 1998		Moine Mhor, Scotland	56.0887	-5.50996	950	5			0	0.01				4									Sonicated, DCM:MeOH			1189	31	19-33	30.5	∑Ci x i/ ∑Ci , i=23-33	16.5	2 x ∑odd C23-C31/∑even C22-C30 + ∑even C24-C32
Ficken et al., 1998		Moine Mhor, Scotland	56.0887	-5.50996	950	5			0.05	0.06				4									Sonicated, DCM:MeOH			3945	31	19-33	30.4	∑Ci x i/ ∑Ci , i=23-33	21.1	2 x ∑odd C23-C31/∑even C22-C30 + ∑even C24-C32
Ficken et al., 1998		Moine Mhor, Scotland	56.0887	-5.50996	950	5			0.13	0.14				4									Sonicated, DCM:MeOH			1717	31	19-33	29.8	∑Ci x i/ ∑Ci , i=23-33	16.7	2 x ∑odd C23-C31/∑even C22-C30 + ∑even C24-C32
Ficken et al., 1998		Moine Mhor, Scotland	56.0887	-5.50996	950	5			0.22	0.23				4									Sonicated, DCM:MeOH			301	31	19-33	30	∑Ci x i/ ∑Ci , i=23-33	23.1	2 x ∑odd C23-C31/∑even C22-C30 + ∑even C24-C32
Ficken et al., 1998		Moine Mhor, Scotland	56.0887	-5.50996	950	5			0.28	0.28				4									Sonicated, DCM:MeOH			398	31	19-33	30.1	∑Ci x i/ ∑Ci , i=23-33	12.9	2 x ∑odd C23-C31/∑even C22-C30 + ∑even C24-C32
Ficken et al., 1998		Moine Mhor, Scotland	56.0887	-5.50996	950	5			0.37	0.38				4									Sonicated, DCM:MeOH			296	31	19-33	29.2	∑Ci x i/ ∑Ci , i=23-33	16.6	2 x ∑odd C23-C31/∑even C22-C30 + ∑even C24-C32
Ficken et al., 1998		Moine Mhor, Scotland	56.0887	-5.50996	950	5			0.53	0.54				4									Sonicated, DCM:MeOH			871	31	19-33	29.7	∑Ci x i/ ∑Ci , i=23-33	13.4	2 x ∑odd C23-C31/∑even C22-C30 + ∑even C24-C32
Hirave et al., 2020	1	Southern Black Forest (Germany)	47.6619	7.78278	535	8.9	1155	Autumn				Fresh material	Stagnosol	3-4.2					45.4			Fagus sylvatica	ASE, DCM:MeOH				27	21-31								0.545972	0.6242	1.02585	0.727862	6.04714	2.25376	53.9651	1.34567	4.54096	0	1.31899	0	0
Hirave et al., 2020	1	Southern Black Forest (Germany)	47.6619	7.78278	535	8.9	1155	Autumn			Oi		Stagnosol	3-4.2					47.2			Fagus sylvatica	ASE, DCM:MeOH				27	21-33								0.557905	0	1.02857	1.01404	6.36776	2.29033	114.964	1.21399	4.05458	0.885095	0.787828	0.646021	0.658003
Hirave et al., 2020	1	Southern Black Forest (Germany)	47.6619	7.78278	535	8.9	1155	Autumn			Oe		Stagnosol	3-4.2					40.1			Fagus sylvatica	ASE, DCM:MeOH				27	21-33								1.83359	0.953009	1.9585	0.939232	3.73675	2.07366	66.7471	1.25865	3.73904	1.18083	1.20217	0.765125	0.861708
Hirave et al., 2020	1	Southern Black Forest (Germany)	47.6619	7.78278	535	8.9	1155	Autumn			A		Stagnosol	3-4.2					10.1			Fagus sylvatica	ASE, DCM:MeOH				27	21-33								17.9963	7.56389	18.9067	7.62358	32.6397	17.6087	372.398	8.3794	33.6398	6.02696	11.3868	3.22119	4.56624
Hirave et al., 2020	2a	Southern Black Forest (Germany)	47.8642	8.10278	965	3.9	1800	Autumn				Fresh material	Podzol	3-4.2					47			Picea abies	ASE, DCM:MeOH				29	21-33								0.372341	0.208461	0.387904	0.218273	0.460581	0.255789	0.445151	0.253344	0.535045	0.376674	0.353089	0.250976	0.258178
Hirave et al., 2020	2a	Southern Black Forest (Germany)	47.8642	8.10278	965	3.9	1800	Autumn			Oi		Podzol	3-4.2					48.9			Picea abies	ASE, DCM:MeOH				29	21-33								0.418546	0	0	0.416269	0.461315	0.431533	0.456962	0.458019	0.701894	0.686915	0.671703	0.487132	0.557838
Hirave et al., 2020	2a	Southern Black Forest (Germany)	47.8642	8.10278	965	3.9	1800	Autumn			Oe		Podzol	3-4.2					48.7			Picea abies	ASE, DCM:MeOH				31	21-33								0.426939	0.391217	0.626507	0.41938	0.803318	0.496961	1.26023	0.639935	1.85335	0.801616	1.86768	0	0.938089
Hirave et al., 2020	2a	Southern Black Forest (Germany)	47.8642	8.10278	965	3.9	1800	Autumn			Oa		Podzol	3-4.2					47.4			Picea abies	ASE, DCM:MeOH				31	21-33								2.62704	0.655791	1.55203	0.829065	2.16697	1.96529	8.89627	4.26626	36.011	5.30078	65.077	2.21326	10.7779
Hirave et al., 2020	2a	Southern Black Forest (Germany)	47.8642	8.10278	965	3.9	1800	Autumn			A		Podzol	3-4.2					11.3			Picea abies	ASE, DCM:MeOH				31	21-33								7.1427	2.83034	7.76596	4.56793	10.5028	7.1841	28.859	13.3059	80.8802	14.6058	128.522	5.38125	23.7029
Hirave et al., 2020	2b	Southern Black Forest (Germany)	47.8642	8.10278	965	3.9	1800	Autumn				Fresh material	Podzol	3-4.2					43.6			Sphagnum quinquefarium	ASE, DCM:MeOH				23	23-33								0	0	1.69427	0.498802	1.29666	0.503364	0.565395	0.503066	0.762325	0.773398	0.621117	0.541943	0.56761
Hirave et al., 2020	2b	Southern Black Forest (Germany)	47.8642	8.10278	965	3.9	1800	Autumn			Oi		Podzol	3-4.2					45.6			Sphagnum quinquefarium	ASE, DCM:MeOH				31	21-33								0.451097	0.399986	1.59191	0.410468	1.50116	0.493031	1.20612	0.599141	1.52354	0.75475	1.58652	0.4685	0.847098
Hirave et al., 2020	2b	Southern Black Forest (Germany)	47.8642	8.10278	965	3.9	1800	Autumn			Oe		Podzol	3-4.2					46.2			Sphagnum quinquefarium	ASE, DCM:MeOH				31	21-33								0.586989	0.461945	0.815036	0.484636	1.41677	0.688934	2.4848	1.22943	5.7589	1.48733	9.54488	0.768875	2.00043
Hirave et al., 2020	2b	Southern Black Forest (Germany)	47.8642	8.10278	965	3.9	1800	Autumn			Oa		Podzol	3-4.2					43.9			Sphagnum quinquefarium	ASE, DCM:MeOH				31	21-33								2.07204	0.714808	2.96351	0.75264	3.56586	1.30941	6.50474	2.04353	16.2457	2.87267	24.565	1.02411	4.73236
Hirave et al., 2020	2b	Southern Black Forest (Germany)	47.8642	8.10278	965	3.9	1800	Autumn			A		Podzol	3-4.2					16.7			Sphagnum quinquefarium	ASE, DCM:MeOH				31	21-33								5.22808	2.71465	5.13553	3.2544	8.5644	5.8629	23.5036	9.96279	44.4149	10.5101	49.5772	2.85344	48.1493
Hirave et al., 2020	3	Lake Baldegg catchment (Switzerland)	47.1681	8.25917	608	8.4	1100	Autumn				Fresh material	Cambisol	3-4.2					48.1			Picea abies	ASE, DCM:MeOH				29	21-32								0.245736	0.205855	0.379661	0.225911	0.490076	0.273274	0.411263	0.264017	0.564504	0.360589	0.347629	0.246448	0
Hirave et al., 2020	3	Lake Baldegg catchment (Switzerland)	47.1681	8.25917	608	8.4	1100	Autumn				Fresh material	Cambisol	3-4.2					44.5			Thuidium tamariscinum	ASE, DCM:MeOH				21	21-33								1.93217	0	0.592614	0.445437	0.653951	0.514766	1.59604	0.50543	1.34534	0.748	1.33547	0.01	0.613801
Hirave et al., 2020	3	Lake Baldegg catchment (Switzerland)	47.1681	8.25917	608	8.4	1100	Autumn			Oi		Cambisol	3-4.2					45.8			Picea abies, Thuidium tamariscinum	ASE, DCM:MeOH				27	21-33								0.634904	0.486511	0.823728	0.504414	1.9614	0.758343	11.5312	0.959637	7.68091	0.834424	1.54747	0	0.75129
Hirave et al., 2020	3	Lake Baldegg catchment (Switzerland)	47.1681	8.25917	608	8.4	1100	Autumn			Oe		Cambisol	3-4.2					46.7			Picea abies, Thuidium tamariscinum	ASE, DCM:MeOH				29	21-33								0.33272	0	0.544988	0.279728	0.518842	0.357907	1.42083	0.418789	1.79183	0.470503	0.590024	0.333644	0.396752
Hirave et al., 2020	3	Lake Baldegg catchment (Switzerland)	47.1681	8.25917	608	8.4	1100	Autumn			Oa		Cambisol	3-4.2					17			Picea abies, Thuidium tamariscinum	ASE, DCM:MeOH				27	21-33								1.76928	2.06476	7.01167	2.12531	10.2272	3.6254	49.5448	5.86698	48.1474	5.91342	21.2456	2.15515	6.71208
Hirave et al., 2020	3	Lake Baldegg catchment (Switzerland)	47.1681	8.25917	608	8.4	1100	Autumn			A		Cambisol	3-4.2					4.3			Picea abies, Thuidium tamariscinum	ASE, DCM:MeOH				29	21-33								4.58244	4.58499	12.2782	5.88349	13.6493	8.14202	36.0808	10.9849	63.0897	13.3781	46.0166	6.01947	13.9183
Hirave et al., 2020	4	Lake Baldegg catchment (Switzerland)	47.1664	8.2625	573	8.4	1100	Autumn				Fresh material	Cambisol	3-4.2					47.6			Picea abies	ASE, DCM:MeOH													0	0	0	0	0	0	0	0	0	0	0	0	0
Hirave et al., 2020	4	Lake Baldegg catchment (Switzerland)	47.1664	8.2625	573	8.4	1100	Autumn			Oi		Cambisol	3-4.2					46.3			Picea abies	ASE, DCM:MeOH				29	21-33								0.835685	0.415518	0.820243	0.360877	0.587336	0.423583	0.758981	0.392698	1.00258	0.589067	0.866573	0.410566	0.610241
Hirave et al., 2020	4	Lake Baldegg catchment (Switzerland)	47.1664	8.2625	573	8.4	1100	Autumn			A		Cambisol	3-4.2					4.8			Picea abies	ASE, DCM:MeOH				27	21-33								5.14851	4.91352	8.02076	3.98483	7.83597	6.38027	34.0326	6.47546	22.7697	8.27499	17.123	4.96732	8.16659
Hirave et al., 2020	5	Upper Sûre Lake catchment (Luxembourg)	49.8658	5.8575	429	9.2	970	Autumn				Fresh material	Cambisol	3-4.2					48			Quercus robur	ASE, DCM:MeOH				27	23-33								0	0	2.87782	1.01293	5.93102	1.21564	7.7756	2.71946	7.14426	2.96211	2.99201	0.852027	0.878534
Hirave et al., 2020	5	Upper Sûre Lake catchment (Luxembourg)	49.8658	5.8575	429	9.2	970	Autumn				Fresh material	Cambisol	3-4.2					46.7			Picea abies	ASE, DCM:MeOH				29	21-33								0.531525	0.284507	0.39584	0.437466	0.709761	0.368349	0.918598	0.44815	1.34474	0.582351	1.09073	0.390368	0.577628
Hirave et al., 2020	5	Upper Sûre Lake catchment (Luxembourg)	49.8658	5.8575	429	9.2	970	Autumn			Oi		Cambisol	3-4.2					47.3			Picea abies, Quercus robur	ASE, DCM:MeOH				27	21-33								1.46701	1.51723	4.6083	3.65891	21.7127	6.44075	84.4346	8.77014	84.4053	4.59936	18.375	1.90132	5.2712
Hirave et al., 2020	5	Upper Sûre Lake catchment (Luxembourg)	49.8658	5.8575	429	9.2	970	Autumn			Oe		Cambisol	3-4.2					45.4			Picea abies, Quercus robur	ASE, DCM:MeOH				29	21-33								2.85176	2.30409	5.69594	4.79988	22.589	8.54624	95.5368	12.4608	100.439	8.95397	30.0433	2.4579	3.98827
Hirave et al., 2020	5	Upper Sûre Lake catchment (Luxembourg)	49.8658	5.8575	429	9.2	970	Autumn			A		Cambisol	3-4.2					10.8			Picea abies, Quercus robur	ASE, DCM:MeOH				29	21-33								11.3641	7.72579	20.6122	10.9027	49.0682	20.1326	177.326	39.3229	311.769	24.7693	112.515	9.6801	47.8976
Howard et al., 2018	NTABRT0004		-22.2894	133.616		22.74	341.05														Burt Plain		ASE, DCM:MeOH				31	25-35	30.88	∑Ci x i/ ∑Ci , i=25-35	6.02	(∑ odd C25-C33) + (∑ odd C27-C35) / (∑ even C26-C34)
Howard et al., 2018	NTADAC0001		-13.1579	130.778		26.53	1642.88														Darwin Coastal		ASE, DCM:MeOH				25	25-35	27.84	∑Ci x i/ ∑Ci , i=25-35	1.28	(∑ odd C25-C33) + (∑ odd C27-C35) / (∑ even C26-C34)
Howard et al., 2018	NTAFIN0019		-24.3577	132.936		21.97	278.92														Finke		ASE, DCM:MeOH				31	25-33	29.61	∑Ci x i/ ∑Ci , i=25-35	5.76	(∑ odd C25-C33) + (∑ odd C27-C35) / (∑ even C26-C34)
Howard et al., 2018	NTAFIN0022		-24.6307	133.452		21.85	251.51														Finke		ASE, DCM:MeOH				27	25-35	27.94	∑Ci x i/ ∑Ci , i=25-35	1.08	(∑ odd C25-C33) + (∑ odd C27-C35) / (∑ even C26-C34)
Howard et al., 2018	NTAGFU0001		-18.9051	137.069		25.73	468.81														Gulf Fall and Uplands		ASE, DCM:MeOH				31	25-35	29.95	∑Ci x i/ ∑Ci , i=25-35	3.57	(∑ odd C25-C33) + (∑ odd C27-C35) / (∑ even C26-C34)
Howard et al., 2018	NTAGFU0008		-18.7856	136.865		25.47	494.62														Gulf Fall and Uplands		ASE, DCM:MeOH				31	25-35	29.8	∑Ci x i/ ∑Ci , i=25-35	3.64	(∑ odd C25-C33) + (∑ odd C27-C35) / (∑ even C26-C34)
Howard et al., 2018	NTAGFU0010		-17.8958	137.101		25.92	673.05														Gulf Fall and Uplands		ASE, DCM:MeOH				31	25-35	29.85	∑Ci x i/ ∑Ci , i=25-35	6.11	(∑ odd C25-C33) + (∑ odd C27-C35) / (∑ even C26-C34)
Howard et al., 2018	NTAGFU0017		-17.3544	137.158		25.71	800.91														Gulf Fall and Uplands		ASE, DCM:MeOH				27	25-34	28.07	∑Ci x i/ ∑Ci , i=25-35	3.37	(∑ odd C25-C33) + (∑ odd C27-C35) / (∑ even C26-C34)
Howard et al., 2018	NTAGFU0031		-14.1254	134.387		27.14	988.65														Gulf Fall and Uplands		ASE, DCM:MeOH				27	25-35	29.34	∑Ci x i/ ∑Ci , i=25-35	2.24	(∑ odd C25-C33) + (∑ odd C27-C35) / (∑ even C26-C34)
Howard et al., 2018	NTAGFU0040		-14.6733	133.845		27.44	923.53														Gulf Fall and Uplands		ASE, DCM:MeOH				29	25-35	29.37	∑Ci x i/ ∑Ci , i=25-35	4.54	(∑ odd C25-C33) + (∑ odd C27-C35) / (∑ even C26-C34)
Howard et al., 2018	SAASTP0001		-26.2777	134.999		22.21	209.25														Stony Plains		ASE, DCM:MeOH				25	25-35	27.41	∑Ci x i/ ∑Ci , i=25-35	1.4	(∑ odd C25-C33) + (∑ odd C27-C35) / (∑ even C26-C34)
Howard et al., 2018	SAASTP0004		-26.0877	135.452		22.6	194.65														Stony Plains		ASE, DCM:MeOH				27	25-35	28.24	∑Ci x i/ ∑Ci , i=25-35	1.17	(∑ odd C25-C33) + (∑ odd C27-C35) / (∑ even C26-C34)
Howard et al., 2018	SATFLB0005		-31.315	138.566		17.85	306.95														Flinders Lofty Block		ASE, DCM:MeOH				27	25-34	28.21	∑Ci x i/ ∑Ci , i=25-35	2.09	(∑ odd C25-C33) + (∑ odd C27-C35) / (∑ even C26-C34)
Howard et al., 2018	SATFLB0008		-32.3205	137.954		15.92	446.71														Flinders Lofty Block		ASE, DCM:MeOH				31	25-35	28.5	∑Ci x i/ ∑Ci , i=25-35	1.85	(∑ odd C25-C33) + (∑ odd C27-C35) / (∑ even C26-C34)
Howard et al., 2018	SATFLB0010		-32.8281	138.033		17.59	402.76														Flinders Lofty Block		ASE, DCM:MeOH				29	25-35	28.21	∑Ci x i/ ∑Ci , i=25-35	1.91	(∑ odd C25-C33) + (∑ odd C27-C35) / (∑ even C26-C34)
Howard et al., 2018	SATFLB0012		-34.8803	138.708		15.35	722.62														Flinders Lofty Block		ASE, DCM:MeOH				31	25-33	28.21	∑Ci x i/ ∑Ci , i=25-35	1.81	(∑ odd C25-C33) + (∑ odd C27-C35) / (∑ even C26-C34)
Howard et al., 2018	SATFLB0014		-34.0047	138.959		14.14	533.39														Flinders Lofty Block		ASE, DCM:MeOH				31	25-35	28.99	∑Ci x i/ ∑Ci , i=25-35	2.5	(∑ odd C25-C33) + (∑ odd C27-C35) / (∑ even C26-C34)
Howard et al., 2018	SATFLB0015		-34.933	138.727		14.03	933.83														Flinders Lofty Block		ASE, DCM:MeOH				29	25-33	27.84	∑Ci x i/ ∑Ci , i=25-35	4.94	(∑ odd C25-C33) + (∑ odd C27-C35) / (∑ even C26-C34)
Howard et al., 2018	SATKAN0001		-35.6078	138.261		14.55	753.76														Kanmantoo		ASE, DCM:MeOH				29	25-35	28.58	∑Ci x i/ ∑Ci , i=25-35	6.41	(∑ odd C25-C33) + (∑ odd C27-C35) / (∑ even C26-C34)
Howard et al., 2018	SATKAN0002		-35.2716	138.69		14.44	823.48														Kanmantoo		ASE, DCM:MeOH				29	25-35	28.1	∑Ci x i/ ∑Ci , i=25-35	3.31	(∑ odd C25-C33) + (∑ odd C27-C35) / (∑ even C26-C34)
Howard et al., 2018	NTA 001317		-22.2894	133.616		22.74	341.05					Fresh material									Burt Plain	Triodia schinzii	Sonicated, DCM:MeOH				33	25-35	30.38	∑Ci x i/ ∑Ci , i=25-35	3.56	(∑ odd C25-C33) + (∑ odd C27-C35) / (∑ even C26-C34)
Howard et al., 2018	NTA 001318		-22.2894	133.616		22.74	341.05					Fresh material									Burt Plain	Aristida holathera	Sonicated, DCM:MeOH				33	25-35	32.35	∑Ci x i/ ∑Ci , i=25-35	37.09	(∑ odd C25-C33) + (∑ odd C27-C35) / (∑ even C26-C34)
Howard et al., 2018	NTA 001301		-22.2894	133.616		22.74	341.05					Fresh material									Burt Plain	Acacia aptaneura (or aneura)	Sonicated, DCM:MeOH				33	25-35	32.06	∑Ci x i/ ∑Ci , i=25-35	13.61	(∑ odd C25-C33) + (∑ odd C27-C35) / (∑ even C26-C34)
Howard et al., 2018	NTA 005954		-13.1579	130.778		26.53	1642.88					Fresh material									Darwin Coastal	Sorghum plumosum	Sonicated, DCM:MeOH				33	25-35	31.84	∑Ci x i/ ∑Ci , i=25-35	5.99	(∑ odd C25-C33) + (∑ odd C27-C35) / (∑ even C26-C34)
Howard et al., 2018	NTA 006020		-13.1579	130.778		26.53	1642.88					Fresh material									Darwin Coastal	Eucalyptus tetrodonta	Sonicated, DCM:MeOH				29	25-35	30.28	∑Ci x i/ ∑Ci , i=25-35	2.37	(∑ odd C25-C33) + (∑ odd C27-C35) / (∑ even C26-C34)
Howard et al., 2018	NTA 006042		-13.1579	130.778		26.53	1642.88					Fresh material									Darwin Coastal	Eucalyptus miniata	Sonicated, DCM:MeOH				29	25-35	29.93	∑Ci x i/ ∑Ci , i=25-35	1.48	(∑ odd C25-C33) + (∑ odd C27-C35) / (∑ even C26-C34)
Howard et al., 2018	NTA 000754		-24.3577	132.936		21.97	278.92					Fresh material									Finke	Cenchrus ciliaris	Sonicated, DCM:MeOH				33	25-35	31.86	∑Ci x i/ ∑Ci , i=25-35	29.05	(∑ odd C25-C33) + (∑ odd C27-C35) / (∑ even C26-C34)
Howard et al., 2018	NTA 000784		-24.3577	132.936		21.97	278.92					Fresh material									Finke	Acacia estrophiolata	Sonicated, DCM:MeOH				31	25-33	30.36	∑Ci x i/ ∑Ci , i=25-35	18.08	(∑ odd C25-C33) + (∑ odd C27-C35) / (∑ even C26-C34)
Howard et al., 2018	NTA 000761		-24.3577	132.936		21.97	278.92					Fresh material									Finke	Enchylaena tomentosa	Sonicated, DCM:MeOH				33	25-33	29.32	∑Ci x i/ ∑Ci , i=25-35	1.17	(∑ odd C25-C33) + (∑ odd C27-C35) / (∑ even C26-C34)
Howard et al., 2018	NTA 000962		-24.6307	133.452		21.85	251.51					Fresh material									Finke	Enneapogon polyphyllus	Sonicated, DCM:MeOH				33	25-35	32.08	∑Ci x i/ ∑Ci , i=25-35	8.69	(∑ odd C25-C33) + (∑ odd C27-C35) / (∑ even C26-C34)
Howard et al., 2018	NTA 000960		-24.6307	133.452		21.85	251.51					Fresh material									Finke	Aristida contorta	Sonicated, DCM:MeOH				31	25-35	31.68	∑Ci x i/ ∑Ci , i=25-35	5.59	(∑ odd C25-C33) + (∑ odd C27-C35) / (∑ even C26-C34)
Howard et al., 2018	NTA 000964		-24.6307	133.452		21.85	251.51					Fresh material									Finke	Eremophila freelingii	Sonicated, DCM:MeOH				33	25-35	30.18	∑Ci x i/ ∑Ci , i=25-35	1.83	(∑ odd C25-C33) + (∑ odd C27-C35) / (∑ even C26-C34)
Howard et al., 2018	NTA 001525		-18.9051	137.069		25.73	468.81					Fresh material									Gulf Fall and Uplands	Enneapogon polyphyllus	Sonicated, DCM:MeOH				33	25-35	32.06	∑Ci x i/ ∑Ci , i=25-35	8.41	(∑ odd C25-C33) + (∑ odd C27-C35) / (∑ even C26-C34)
Howard et al., 2018	NTA 001524		-18.9051	137.069		25.73	468.81					Fresh material									Gulf Fall and Uplands	Aristida pruinosa	Sonicated, DCM:MeOH				31	25-35	30.81	∑Ci x i/ ∑Ci , i=25-35	2.5	(∑ odd C25-C33) + (∑ odd C27-C35) / (∑ even C26-C34)
Howard et al., 2018	NTA 001531		-18.9051	137.069		25.73	468.81					Fresh material									Gulf Fall and Uplands	Eucalyptus pruinosa	Sonicated, DCM:MeOH				27	25-33	27.58	∑Ci x i/ ∑Ci , i=25-35	3.59	(∑ odd C25-C33) + (∑ odd C27-C35) / (∑ even C26-C34)
Howard et al., 2018	NTA 002012		-18.7856	136.865		25.47	494.62					Fresh material									Gulf Fall and Uplands	Triodia pungens	Sonicated, DCM:MeOH				31	25-35	30.79	∑Ci x i/ ∑Ci , i=25-35	42.72	(∑ odd C25-C33) + (∑ odd C27-C35) / (∑ even C26-C34)
Howard et al., 2018	NTA 002018		-18.7856	136.865		25.47	494.62					Fresh material									Gulf Fall and Uplands	Fimbristylis dichotoma	Sonicated, DCM:MeOH				33	25-35	32.06	∑Ci x i/ ∑Ci , i=25-35	2.58	(∑ odd C25-C33) + (∑ odd C27-C35) / (∑ even C26-C34)
Howard et al., 2018	NTA 002011		-18.7856	136.865		25.47	494.62					Fresh material									Gulf Fall and Uplands	Aristida contorta	Sonicated, DCM:MeOH				25	25-35	28.53	∑Ci x i/ ∑Ci , i=25-35	1.57	(∑ odd C25-C33) + (∑ odd C27-C35) / (∑ even C26-C34)
Howard et al., 2018	NTA 002136		-17.8958	137.101		25.92	673.05					Fresh material									Gulf Fall and Uplands	Triodia pungens	Sonicated, DCM:MeOH				31	25-35	31.13	∑Ci x i/ ∑Ci , i=25-35	45.55	(∑ odd C25-C33) + (∑ odd C27-C35) / (∑ even C26-C34)
Howard et al., 2018	NTA 002140		-17.8958	137.101		25.92	673.05					Fresh material									Gulf Fall and Uplands	Eucalyptus leucophloia	Sonicated, DCM:MeOH				31	25-33	30.66	∑Ci x i/ ∑Ci , i=25-35	23.71	(∑ odd C25-C33) + (∑ odd C27-C35) / (∑ even C26-C34)
Howard et al., 2018	NTA 002610		-17.3544	137.158		25.71	800.91					Fresh material									Gulf Fall and Uplands	Chrysopogon fallax	Sonicated, DCM:MeOH				31	25-35	30.49	∑Ci x i/ ∑Ci , i=25-35	3.06	(∑ odd C25-C33) + (∑ odd C27-C35) / (∑ even C26-C34)
Howard et al., 2018	NTA 002681		-17.3544	137.158		25.71	800.91					Fresh material									Gulf Fall and Uplands	Schizachyrium fragile	Sonicated, DCM:MeOH				31	25-33	31.52	∑Ci x i/ ∑Ci , i=25-35	17.42	(∑ odd C25-C33) + (∑ odd C27-C35) / (∑ even C26-C34)
Howard et al., 2018	NTA 002634		-17.3544	137.158		25.71	800.91					Fresh material									Gulf Fall and Uplands	Melaleuca viridiflora	Sonicated, DCM:MeOH				27	25-31	28.18	∑Ci x i/ ∑Ci , i=25-35	7.52	(∑ odd C25-C33) + (∑ odd C27-C35) / (∑ even C26-C34)
Howard et al., 2018	NTA 003588		-14.1254	134.387		27.14	988.65					Fresh material									Gulf Fall and Uplands	Schizachyrium pachyarthron	Sonicated, DCM:MeOH				33	25-35	31.08	∑Ci x i/ ∑Ci , i=25-35	8.2	(∑ odd C25-C33) + (∑ odd C27-C35) / (∑ even C26-C34)
Howard et al., 2018	NTA 003622		-14.1254	134.387		27.14	988.65					Fresh material									Gulf Fall and Uplands	Melaleuca viridiflora	Sonicated, DCM:MeOH				34	25-35	31.08	∑Ci x i/ ∑Ci , i=25-35	1.02	(∑ odd C25-C33) + (∑ odd C27-C35) / (∑ even C26-C34)
Howard et al., 2018	NTA 003613		-14.1254	134.387		27.14	988.65					Fresh material									Gulf Fall and Uplands	Petalostigma banksii	Sonicated, DCM:MeOH				31	25-33	29.76	∑Ci x i/ ∑Ci , i=25-35	3.96	(∑ odd C25-C33) + (∑ odd C27-C35) / (∑ even C26-C34)
Howard et al., 2018	NTA 003995		-14.6733	133.845		27.44	923.53					Fresh material									Gulf Fall and Uplands	Heteropogon contortus	Sonicated, DCM:MeOH				31	25-35	31.33	∑Ci x i/ ∑Ci , i=25-35	10.52	(∑ odd C25-C33) + (∑ odd C27-C35) / (∑ even C26-C34)
Howard et al., 2018	NTA 004200		-14.6733	133.845		27.44	923.53					Fresh material									Gulf Fall and Uplands	Acacia dimidiata	Sonicated, DCM:MeOH				33	25-35	31.33	∑Ci x i/ ∑Ci , i=25-35	3.43	(∑ odd C25-C33) + (∑ odd C27-C35) / (∑ even C26-C34)
Howard et al., 2018	NTA 003965		-14.6733	133.845		27.44	923.53					Fresh material									Gulf Fall and Uplands	Eucalyptus tectifica	Sonicated, DCM:MeOH				29	27-29	28.11	∑Ci x i/ ∑Ci , i=25-35		(∑ odd C25-C33) + (∑ odd C27-C35) / (∑ even C26-C34)
Howard et al., 2018	SAA 000294		-26.2777	134.999		22.21	209.25					Fresh material									Stony Plains	Eragrostis setifolia	Sonicated, DCM:MeOH				31	25-33	31.05	∑Ci x i/ ∑Ci , i=25-35	104.5	(∑ odd C25-C33) + (∑ odd C27-C35) / (∑ even C26-C34)
Howard et al., 2018	SAA 000250		-26.2777	134.999		22.21	209.25					Fresh material									Stony Plains	Maireana aphylla	Sonicated, DCM:MeOH				31	25-33	28.55	∑Ci x i/ ∑Ci , i=25-35	7.58	(∑ odd C25-C33) + (∑ odd C27-C35) / (∑ even C26-C34)
Howard et al., 2018	SAA 000338		-26.2777	134.999		22.21	209.25					Fresh material									Stony Plains	Acacia aneura var. tenuis	Sonicated, DCM:MeOH				33	25-35	31.71	∑Ci x i/ ∑Ci , i=25-35	7.61	(∑ odd C25-C33) + (∑ odd C27-C35) / (∑ even C26-C34)
Howard et al., 2018	SAA 000019		-26.0877	135.452		22.6	194.65					Fresh material									Stony Plains	Malvastrum americanum var. americanum	Sonicated, DCM:MeOH				31	25-35	29.58	∑Ci x i/ ∑Ci , i=25-35	11.41	(∑ odd C25-C33) + (∑ odd C27-C35) / (∑ even C26-C34)
Howard et al., 2018	SAA 000016		-26.0877	135.452		22.6	194.65					Fresh material									Stony Plains	Rutidosis helichrysoides subsp. Helichrysoides	Sonicated, DCM:MeOH				31	25-35	31.73	∑Ci x i/ ∑Ci , i=25-35	6.4	(∑ odd C25-C33) + (∑ odd C27-C35) / (∑ even C26-C34)
Howard et al., 2018	SAA 000022		-26.0877	135.452		22.6	194.65					Fresh material									Stony Plains	Sida fibulifera	Sonicated, DCM:MeOH				33	27-35	32.16	∑Ci x i/ ∑Ci , i=25-35	11.32	(∑ odd C25-C33) + (∑ odd C27-C35) / (∑ even C26-C34)
Howard et al., 2018	SAT 000287		-31.315	138.566		17.85	306.95					Fresh material									Flinders Lofty Block	Chrysocephalum semipapposum	Sonicated, DCM:MeOH				31	25-35	30.53	∑Ci x i/ ∑Ci , i=25-35	8.87	(∑ odd C25-C33) + (∑ odd C27-C35) / (∑ even C26-C34)
Howard et al., 2018	SAT 000316		-31.315	138.566		17.85	306.95					Fresh material									Flinders Lofty Block	Dodonaea viscosa subsp. angustissima	Sonicated, DCM:MeOH				29	25-35	28.85	∑Ci x i/ ∑Ci , i=25-35	2.42	(∑ odd C25-C33) + (∑ odd C27-C35) / (∑ even C26-C34)
Howard et al., 2018	SAT 000286		-31.315	138.566		17.85	306.95					Fresh material									Flinders Lofty Block	Eucalyptus flindersii	Sonicated, DCM:MeOH				27	25-31	26.66	∑Ci x i/ ∑Ci , i=25-35	5.59	(∑ odd C25-C33) + (∑ odd C27-C35) / (∑ even C26-C34)
Howard et al., 2018	SAT 000424		-32.3205	137.954		15.92	446.71					Fresh material									Flinders Lofty Block	Triodia scariosa	Sonicated, DCM:MeOH				31	25-31	30.16	∑Ci x i/ ∑Ci , i=25-35		(∑ odd C25-C33) + (∑ odd C27-C35) / (∑ even C26-C34)
Howard et al., 2018	SAT 000419		-32.3205	137.954		15.92	446.71					Fresh material									Flinders Lofty Block	Cassinia laevis	Sonicated, DCM:MeOH				31	25-35	30.29	∑Ci x i/ ∑Ci , i=25-35	2.59	(∑ odd C25-C33) + (∑ odd C27-C35) / (∑ even C26-C34)
Howard et al., 2018	SAT 000401		-32.3205	137.954		15.92	446.71					Fresh material									Flinders Lofty Block	Casuarina pauper	Sonicated, DCM:MeOH				31	25-35	31.33	∑Ci x i/ ∑Ci , i=25-35	6.52	(∑ odd C25-C33) + (∑ odd C27-C35) / (∑ even C26-C34)
Howard et al., 2018	SAT 000552		-32.8281	138.033		17.59	402.76					Fresh material									Flinders Lofty Block	Rhagodia paradoxa	Sonicated, DCM:MeOH				32	25-35	30.16	∑Ci x i/ ∑Ci , i=25-35	0.55	(∑ odd C25-C33) + (∑ odd C27-C35) / (∑ even C26-C34)
Howard et al., 2018	SAT 000550		-32.8281	138.033		17.59	402.76					Fresh material									Flinders Lofty Block	Enchylaena tomentosa var. tomentosa	Sonicated, DCM:MeOH				31	25-35	30.48	∑Ci x i/ ∑Ci , i=25-35	1.07	(∑ odd C25-C33) + (∑ odd C27-C35) / (∑ even C26-C34)
Howard et al., 2018	SAT 000535		-32.8281	138.033		17.59	402.76					Fresh material									Flinders Lofty Block	Eucalyptus odorata	Sonicated, DCM:MeOH				27	25-31	26.78	∑Ci x i/ ∑Ci , i=25-35	2.75	(∑ odd C25-C33) + (∑ odd C27-C35) / (∑ even C26-C34)
Howard et al., 2018	SAT 000649		-34.8803	138.708		15.35	722.62					Fresh material									Flinders Lofty Block	Allocasuarina muelleriana subsp. Muelleriana	Sonicated, DCM:MeOH				31	25-33	31.07	∑Ci x i/ ∑Ci , i=25-35	31.76	(∑ odd C25-C33) + (∑ odd C27-C35) / (∑ even C26-C34)
Howard et al., 2018	SAT 000657		-34.8803	138.708		15.35	722.62					Fresh material									Flinders Lofty Block	Hibbertia crinita	Sonicated, DCM:MeOH				31	25-33	29.98	∑Ci x i/ ∑Ci , i=25-35	17.59	(∑ odd C25-C33) + (∑ odd C27-C35) / (∑ even C26-C34)
Howard et al., 2018	SAT 000630		-34.8803	138.708		15.35	722.62					Fresh material									Flinders Lofty Block	Eucalyptus fasciculosa	Sonicated, DCM:MeOH				27	25-35	28.31	∑Ci x i/ ∑Ci , i=25-35	3.34	(∑ odd C25-C33) + (∑ odd C27-C35) / (∑ even C26-C34)
Howard et al., 2018	SAT 000791		-34.0047	138.959		14.14	533.39					Fresh material									Flinders Lofty Block	Xanthorrhoea quadrangulata	Sonicated, DCM:MeOH				31	25-33	30.32	∑Ci x i/ ∑Ci , i=25-35	27.4	(∑ odd C25-C33) + (∑ odd C27-C35) / (∑ even C26-C34)
Howard et al., 2018	SAT 000775		-34.0047	138.959		14.14	533.39					Fresh material									Flinders Lofty Block	Allocasuarina verticillata	Sonicated, DCM:MeOH				31	25-33	31.02	∑Ci x i/ ∑Ci , i=25-35	57.04	(∑ odd C25-C33) + (∑ odd C27-C35) / (∑ even C26-C34)
Howard et al., 2018	SAT 000746		-34.0047	138.959		14.14	533.39					Fresh material									Flinders Lofty Block	Eucalyptus odorata	Sonicated, DCM:MeOH				31	25-34	29.8	∑Ci x i/ ∑Ci , i=25-35	1.37	(∑ odd C25-C33) + (∑ odd C27-C35) / (∑ even C26-C34)
Howard et al., 2018	SAT 000860		-34.933	138.727		14.03	933.83					Fresh material									Flinders Lofty Block	Lepidosperma semiteres	Sonicated, DCM:MeOH				31	25-35	31.11	∑Ci x i/ ∑Ci , i=25-35	2.57	(∑ odd C25-C33) + (∑ odd C27-C35) / (∑ even C26-C34)
Howard et al., 2018	SAT 000866		-34.933	138.727		14.03	933.83					Fresh material									Flinders Lofty Block	Hibbertia crinita	Sonicated, DCM:MeOH				27	25-31	28.29	∑Ci x i/ ∑Ci , i=25-35	41.29	(∑ odd C25-C33) + (∑ odd C27-C35) / (∑ even C26-C34)
Howard et al., 2018	SAT 000816		-34.933	138.727		14.03	933.83					Fresh material									Flinders Lofty Block	Eucalyptus obliqua	Sonicated, DCM:MeOH				27	25-35	28.23	∑Ci x i/ ∑Ci , i=25-35	2.82	(∑ odd C25-C33) + (∑ odd C27-C35) / (∑ even C26-C34)
Howard et al., 2018	SAT 000167		-35.6078	138.261		14.55	753.76					Fresh material									Kanmantoo	Lepidosperma semiteres	Sonicated, DCM:MeOH				31	25-35	31.52	∑Ci x i/ ∑Ci , i=25-35	62.07	(∑ odd C25-C33) + (∑ odd C27-C35) / (∑ even C26-C34)
Howard et al., 2018	SAT 000124		-35.6078	138.261		14.55	753.76					Fresh material									Kanmantoo	Pultenaea involucrata	Sonicated, DCM:MeOH				33	25-35	31.82	∑Ci x i/ ∑Ci , i=25-35	57.95	(∑ odd C25-C33) + (∑ odd C27-C35) / (∑ even C26-C34)
Howard et al., 2018	SAT 000122		-35.6078	138.261		14.55	753.76					Fresh material									Kanmantoo	Eucalyptus baxteri	Sonicated, DCM:MeOH				29	25-35	29.86	∑Ci x i/ ∑Ci , i=25-35	1.34	(∑ odd C25-C33) + (∑ odd C27-C35) / (∑ even C26-C34)
Howard et al., 2018	SAT 000218		-35.2716	138.69		14.44	823.48					Fresh material									Kanmantoo	Lepidosperma semiteres	Sonicated, DCM:MeOH				31	27-35	31.9	∑Ci x i/ ∑Ci , i=25-35	106.56	(∑ odd C25-C33) + (∑ odd C27-C35) / (∑ even C26-C34)
Howard et al., 2018	SAT 000207		-35.2716	138.69		14.44	823.48					Fresh material									Kanmantoo	Hakea rostrata	Sonicated, DCM:MeOH				31	25-33	30.38	∑Ci x i/ ∑Ci , i=25-35	30.91	(∑ odd C25-C33) + (∑ odd C27-C35) / (∑ even C26-C34)
Howard et al., 2018	SAT 000191		-35.2716	138.69		14.44	823.48					Fresh material									Kanmantoo	Eucalyptus obliqua	Sonicated, DCM:MeOH				31	25-35	29.13	∑Ci x i/ ∑Ci , i=25-35	10.11	(∑ odd C25-C33) + (∑ odd C27-C35) / (∑ even C26-C34)
Huang et al., 1996		Moor House Nature Reserve, UK	54.7191	-2.46283	750-775				0.01		Lf		Peaty gley	<4.5						49.7			Sonicated, MeOH:CH2Cl2				31	25-33			24.25	2 x ∑odd C23-C33/∑even C22-C32 + ∑even C24-C34
Huang et al., 1996		Moor House Nature Reserve, UK	54.7191	-2.46283	750-775				0.0175		Lf		Peaty gley	<4.5									Sonicated, MeOH:CH2Cl2			55.16	31	25-35			14.99	2 x ∑odd C23-C33/∑even C22-C32 + ∑even C24-C34
Huang et al., 1996		Moor House Nature Reserve, UK	54.7191	-2.46283	750-775				0.045		Oh		Peaty gley	<4.5						53.9			Sonicated, MeOH:CH2Cl2			328.23	31	23-35			12.42	2 x ∑odd C23-C33/∑even C22-C32 + ∑even C24-C34
Huang et al., 1996		Moor House Nature Reserve, UK	54.7191	-2.46283	750-775				0.085		Oh		Peaty gley	<4.5						39.9			Sonicated, MeOH:CH2Cl2				31	23-33			14.19	2 x ∑odd C23-C33/∑even C22-C32 + ∑even C24-C34
Huang et al., 1996		Moor House Nature Reserve, UK	54.7191	-2.46283	750-775				0.105		Oh		Peaty gley	<4.5						29.6			Sonicated, MeOH:CH2Cl2				31	23-33			10.5	2 x ∑odd C23-C33/∑even C22-C32 + ∑even C24-C34
Huang et al., 1996		Moor House Nature Reserve, UK	54.7191	-2.46283	750-775				0.135		Ah		Peaty gley	<4.5						8.1			Sonicated, MeOH:CH2Cl2			29.86	31	23-33			4.3	2 x ∑odd C23-C33/∑even C22-C32 + ∑even C24-C34
Huang et al., 1996		Moor House Nature Reserve, UK	54.7191	-2.46283	750-775				0.185		G		Peaty gley	<4.5						3.6			Sonicated, MeOH:CH2Cl2				31	21-35			5.51	2 x ∑odd C23-C33/∑even C22-C32 + ∑even C24-C34
Huang et al., 1996		Moor House Nature Reserve, UK	54.7191	-2.46283	750-775				0.235		G		Peaty gley	<4.5						2.6			Sonicated, MeOH:CH2Cl2			2.03	31	21-33			2.3	2 x ∑odd C23-C33/∑even C22-C32 + ∑even C24-C34
Huang et al., 1996		Moor House Nature Reserve, UK	54.7191	-2.46283	750-775				0.01		Lf		Acid brown earth	<4.5									Sonicated, MeOH:CH2Cl2			130.53	29	25-35			16.81	2 x ∑odd C23-C33/∑even C22-C32 + ∑even C24-C34
Huang et al., 1996		Moor House Nature Reserve, UK	54.7191	-2.46283	750-775				0.03		Oh		Acid brown earth	<4.5						26.9			Sonicated, MeOH:CH2Cl2			258.86	31	25-35			15.96	2 x ∑odd C23-C33/∑even C22-C32 + ∑even C24-C34
Huang et al., 1996		Moor House Nature Reserve, UK	54.7191	-2.46283	750-775				0.05		Ah		Acid brown earth	<4.5						10.7			Sonicated, MeOH:CH2Cl2			101.61	31	25-35			6.39	2 x ∑odd C23-C33/∑even C22-C32 + ∑even C24-C34
Huang et al., 1996		Moor House Nature Reserve, UK	54.7191	-2.46283	750-775				0.09		Ah		Acid brown earth	<4.5						5.4			Sonicated, MeOH:CH2Cl2			21.72	31	25-35			4.98	2 x ∑odd C23-C33/∑even C22-C32 + ∑even C24-C34
Huang et al., 1996		Moor House Nature Reserve, UK	54.7191	-2.46283	750-775				0.13		Ah		Acid brown earth	<4.5						5.8			Sonicated, MeOH:CH2Cl2			19.75	31	25-35			5.01	2 x ∑odd C23-C33/∑even C22-C32 + ∑even C24-C34
Huang et al., 1996		Moor House Nature Reserve, UK	54.7191	-2.46283	750-775				0.15		A/E		Acid brown earth	<4.5						2.7			Sonicated, MeOH:CH2Cl2			3.22	31	25-35			4.43	2 x ∑odd C23-C33/∑even C22-C32 + ∑even C24-C34
Huang et al., 1996		Moor House Nature Reserve, UK	54.7191	-2.46283	750-775				0.24		B		Acid brown earth	<4.5						1.8			Sonicated, MeOH:CH2Cl2			4.65	31	25-35			4.3	2 x ∑odd C23-C33/∑even C22-C32 + ∑even C24-C34
Huang et al., 1996		Moor House Nature Reserve, UK	54.7191	-2.46283	750-775				0.005		Lf		Podzol	<4.5									Sonicated, MeOH:CH2Cl2			38.86	31	23-33			5.73	2 x ∑odd C23-C33/∑even C22-C32 + ∑even C24-C34
Huang et al., 1996		Moor House Nature Reserve, UK	54.7191	-2.46283	750-775				0.02		Oh		Podzol	<4.5						37.7			Sonicated, MeOH:CH2Cl2			12.53	31	23-33			10.04	2 x ∑odd C23-C33/∑even C22-C32 + ∑even C24-C34
Huang et al., 1996		Moor House Nature Reserve, UK	54.7191	-2.46283	750-775				0.04		E		Podzol	<4.5						4.9			Sonicated, MeOH:CH2Cl2			1.32	31	23-33			5.82	2 x ∑odd C23-C33/∑even C22-C32 + ∑even C24-C34
Huang et al., 1996		Moor House Nature Reserve, UK	54.7191	-2.46283	750-775				0.08		B		Podzol	<4.5						2.5			Sonicated, MeOH:CH2Cl2			10.65	31	25-35			5.96	2 x ∑odd C23-C33/∑even C22-C32 + ∑even C24-C34
Huang et al., 1996		Moor House Nature Reserve, UK	54.7191	-2.46283	750-775				0.1		B		Podzol	<4.5									Sonicated, MeOH:CH2Cl2			5.72	31	25-35			5.03	2 x ∑odd C23-C33/∑even C22-C32 + ∑even C24-C34
Lehtonen and Ketola, 1993		Kaurastensuo bog (Lammi, southern Finland)	61.0775	25.011					0												Sphagnum		Soxhlet, DCM:Acetone				23	18-33			8.7	exact formula not reported, used chain lengths 17-35
Lehtonen and Ketola, 1993		Kaurastensuo bog (Lammi, southern Finland)	61.0775	25.011					0.1												Sphagnum		Soxhlet, DCM:Acetone				23	18-35			7.9	exact formula not reported, used chain lengths 17-35
Lehtonen and Ketola, 1993		Kaurastensuo bog (Lammi, southern Finland)	61.0775	25.011					0.5												Sphagnum		Soxhlet, DCM:Acetone				27	17-35			9	exact formula not reported, used chain lengths 17-35
Lehtonen and Ketola, 1993		Kaurastensuo bog (Lammi, southern Finland)	61.0775	25.011					1												Sphagnum		Soxhlet, DCM:Acetone				23	16-35			8	exact formula not reported, used chain lengths 17-35
Lehtonen and Ketola, 1993		Kaurastensuo bog (Lammi, southern Finland)	61.0775	25.011					1.9	2											Sphagnum		Soxhlet, DCM:Acetone				25,27	18-35			8.1	exact formula not reported, used chain lengths 17-35
Lehtonen and Ketola, 1993		Kaurastensuo bog (Lammi, southern Finland)	61.0775	25.011					2.5												Sphagnum		Soxhlet, DCM:Acetone				31	18-33			10.2	exact formula not reported, used chain lengths 17-35
Lehtonen and Ketola, 1993		Norrbomuren fen (Gävleborg county, eastern Sweden)	61.3012	16.1534					0.5	0.7											Sphagnum, Carex		Soxhlet, DCM:Acetone				31	16-33			8.3	exact formula not reported, used chain lengths 17-35
Lehtonen and Ketola, 1993		Norrbomuren fen (Gävleborg county, eastern Sweden)	61.3012	16.1534					65	0.85											Sphagnum, Carex		Soxhlet, DCM:Acetone				31	16-33			7.8	exact formula not reported, used chain lengths 17-35
Lehtonen and Ketola, 1993		Norrbomuren fen (Gävleborg county, eastern Sweden)	61.3012	16.1534					1.6	1.8											Sphagnum, Carex		Soxhlet, DCM:Acetone				31	16-33			6.7	exact formula not reported, used chain lengths 17-35
Lehtonen and Ketola, 1993		Norrbomuren fen (Gävleborg county, eastern Sweden)	61.3012	16.1534					0.3	0.5											Sphagnum, Carex		Soxhlet, DCM:Acetone				31	16-33			5.9	exact formula not reported, used chain lengths 17-35
Lehtonen and Ketola, 1993		Norrbomuren fen (Gävleborg county, eastern Sweden)	61.3012	16.1534					0.75	0.95											Sphagnum, Carex		Soxhlet, DCM:Acetone				29	16-31			6.6	exact formula not reported, used chain lengths 17-35
Lehtonen and Ketola, 1993		Norrbomuren fen (Gävleborg county, eastern Sweden)	61.3012	16.1534					1	1.2											Sphagnum, Carex		Soxhlet, DCM:Acetone				31	16-31			5.5	exact formula not reported, used chain lengths 17-35
Lehtonen and Ketola, 1993		Norrbomuren fen (Gävleborg county, eastern Sweden)	61.3012	16.1534					1.3	1.5											Sphagnum, Carex		Soxhlet, DCM:Acetone				31	16-31			6.3	exact formula not reported, used chain lengths 17-35
Lehtonen and Ketola, 1993		Ahvenjärvenvuoma mire (Kittilä, northern Finland)	67.6507	24.9158					1.85	1.95											Bryales		Soxhlet, DCM:Acetone				19	16-34			3.2	exact formula not reported, used chain lengths 17-35
Lehtonen and Ketola, 1993		Ahvenjärvenvuoma mire (Kittilä, northern Finland)	67.6507	24.9158					2.1	2.2											Bryales		Soxhlet, DCM:Acetone				25	16-36			3.5	exact formula not reported, used chain lengths 17-35
Lehtonen and Ketola, 1993		Ahvenjärvenvuoma mire (Kittilä, northern Finland)	67.6507	24.9158					2.35	2.45											Bryales		Soxhlet, DCM:Acetone				25	16-35			4.6	exact formula not reported, used chain lengths 17-35
Lehtonen and Ketola, 1993		Ahvenjärvenvuoma mire (Kittilä, northern Finland)	67.6507	24.9158					2.55	2.65											Bryales		Soxhlet, DCM:Acetone				25	16-34			3.8	exact formula not reported, used chain lengths 17-35
Lehtonen and Ketola, 1993		Suurisuo mire (Janakkala, southern Finland)	60.9201	24.646					0	0.05											Carex, Bryales		Soxhlet, DCM:Acetone				29	16-36			5.1	exact formula not reported, used chain lengths 17-35
Lehtonen and Ketola, 1993		Suurisuo mire (Janakkala, southern Finland)	60.9201	24.646					0.35	0.4											Carex, Bryales		Soxhlet, DCM:Acetone				27	16-36			3.4	exact formula not reported, used chain lengths 17-35
Lehtonen and Ketola, 1993		Suurisuo mire (Janakkala, southern Finland)	60.9201	24.646					0.95	1											Carex, Bryales		Soxhlet, DCM:Acetone				23	16-36			3.9	exact formula not reported, used chain lengths 17-35
Lehtonen and Ketola, 1993		Suurisuo mire (Janakkala, southern Finland)	60.9201	24.646					1.45	1.5											Carex, Bryales		Soxhlet, DCM:Acetone				31	16-36			4.4	exact formula not reported, used chain lengths 17-35
Lehtonen and Ketola, 1993		Suurisuo mire (Janakkala, southern Finland)	60.9201	24.646					1.95	2											Carex, Bryales		Soxhlet, DCM:Acetone				23	16-36			3	exact formula not reported, used chain lengths 17-35
Lehtonen and Ketola, 1993		Suurisuo mire (Janakkala, southern Finland)	60.9201	24.646					2.45	2.5											Carex, Bryales		Soxhlet, DCM:Acetone				27	16-36			7	exact formula not reported, used chain lengths 17-35
Lei et al., 2010		Xinglong Mountain	35.7833	104.067	2600	4.1	625	Late autumn				Fresh material										Populus davidialga	Sonicated, DCM:MeOH				27	17-31	26.4	∑Ci x i/ ∑Ci , i=15-34	11.5	2 x ∑odd C23-C33/∑even C22-C32 + ∑even C24-C34
Lei et al., 2010		Xinglong Mountain	35.7833	104.067	2600	4.1	625	Late autumn				Fresh material										Picea wolsonii	Sonicated, DCM:MeOH				29	15-33	27.1	∑Ci x i/ ∑Ci , i=15-34	7.1	2 x ∑odd C23-C33/∑even C22-C32 + ∑even C24-C34
Lei et al., 2010		Xinglong Mountain	35.7833	104.067	2600	4.1	625	Late autumn				Fresh material										Picea crassifolia	Sonicated, DCM:MeOH				29	15-33	25.1	∑Ci x i/ ∑Ci , i=15-34	3.7	2 x ∑odd C23-C33/∑even C22-C32 + ∑even C24-C34
Lei et al., 2010		Xinglong Mountain	35.7833	104.067	2600	4.1	625	Late autumn				Fresh material										Entodon sp., Hygrohypnum sp.	Sonicated, DCM:MeOH				29	15-33	24	∑Ci x i/ ∑Ci , i=15-34	3.4	2 x ∑odd C23-C33/∑even C22-C32 + ∑even C24-C34
Lei et al., 2010		Xinglong Mountain	35.7833	104.067	2600	4.1	625	Late autumn				Fresh material										Stipa bungeuna, Stipa bungeunsis	Sonicated, DCM:MeOH				31	25-33	29.9	∑Ci x i/ ∑Ci , i=15-34	12.3	2 x ∑odd C23-C33/∑even C22-C32 + ∑even C24-C34
Lei et al., 2010		Xinglong Mountain	35.7833	104.067	2600	4.1	625	Late autumn	0														Sonicated, DCM:MeOH				29	18-33	27.8	∑Ci x i/ ∑Ci , i=15-34	8.4	2 x ∑odd C23-C33/∑even C22-C32 + ∑even C24-C34
Lei et al., 2010		Xinglong Mountain	35.7833	104.067	2600	4.1	625	Late autumn	0														Sonicated, DCM:MeOH				27	15-33	27	∑Ci x i/ ∑Ci , i=15-34	5.4	2 x ∑odd C23-C33/∑even C22-C32 + ∑even C24-C34
Lei et al., 2010		Xinglong Mountain	35.7833	104.067	2600	4.1	625	Late autumn	0.2														Sonicated, DCM:MeOH				31	15-33	27	∑Ci x i/ ∑Ci , i=15-34	3.8	2 x ∑odd C23-C33/∑even C22-C32 + ∑even C24-C34
Lei et al., 2010		Xinglong Mountain	35.7833	104.067	2600	4.1	625	Late autumn	0.4														Sonicated, DCM:MeOH				31	15-34	27	∑Ci x i/ ∑Ci , i=15-34	5.2	2 x ∑odd C23-C33/∑even C22-C32 + ∑even C24-C34
Lei et al., 2010		Xinglong Mountain	35.7833	104.067	2600	4.1	625	Late autumn	0.7														Sonicated, DCM:MeOH				31	15-33	27.2	∑Ci x i/ ∑Ci , i=15-34	7	2 x ∑odd C23-C33/∑even C22-C32 + ∑even C24-C34
Lemma et al., 2019		Bale Mountains, Ethiopia	6.9241	39.7024	3226			February				Fresh material										Erica arborea	Soxhlet, DCM:MeOH			2185.29	31	16-35	30.2648	∑Ci x i/ ∑Ci , i=27-33	11.7218	????	18.5077	(∑ odd C27-C33)/ (∑ even C26-C32)															0
Lemma et al., 2019		Bale Mountains, Ethiopia	6.9241	39.7024	3230			February				Fresh material										Erica arborea	Soxhlet, DCM:MeOH			2897.09	31	16-35	30.5779	∑Ci x i/ ∑Ci , i=27-33	13.5246	????	22.7291	(∑ odd C27-C33)/ (∑ even C26-C32)															0
Lemma et al., 2019		Bale Mountains, Ethiopia	6.9241	39.7024	3670			February				Fresh material										Erica arborea	Soxhlet, DCM:MeOH			2772.62	31	16-35	30.5495	∑Ci x i/ ∑Ci , i=27-33	14.328	????	23.6204	(∑ odd C27-C33)/ (∑ even C26-C32)															0
Lemma et al., 2019		Bale Mountains, Ethiopia	6.9241	39.7024	3850			February				Fresh material										Erica arborea	Soxhlet, DCM:MeOH			5613.94	31	16-35	30.6785	∑Ci x i/ ∑Ci , i=27-33	5.05244	????	5.86634	(∑ odd C27-C33)/ (∑ even C26-C32)															0
Lemma et al., 2019		Bale Mountains, Ethiopia	6.9241	39.7024	4210			February				Fresh material										Erica arborea	Soxhlet, DCM:MeOH			2827.64	31	17-35	30.5231	∑Ci x i/ ∑Ci , i=27-33	10.0082	????	13.4857	(∑ odd C27-C33)/ (∑ even C26-C32)															0
Lemma et al., 2019		Bale Mountains, Ethiopia	6.9241	39.7024	3530			February				Fresh material										Erica trimera	Soxhlet, DCM:MeOH			1449.59	31	16-35	30.8945	∑Ci x i/ ∑Ci , i=27-33	12.7542	????	22.2591	(∑ odd C27-C33)/ (∑ even C26-C32)															0
Lemma et al., 2019		Bale Mountains, Ethiopia	6.9241	39.7024	3870			February				Fresh material										Erica trimera	Soxhlet, DCM:MeOH			1403.5	31	16-35	30.3953	∑Ci x i/ ∑Ci , i=27-33	13.2885	????	20.4212	(∑ odd C27-C33)/ (∑ even C26-C32)															0
Lemma et al., 2019		Bale Mountains, Ethiopia	6.9241	39.7024	3950			February				Fresh material										Erica trimera	Soxhlet, DCM:MeOH			2983.06	31	16-35	30.5635	∑Ci x i/ ∑Ci , i=27-33	16.9012	????	28.4576	(∑ odd C27-C33)/ (∑ even C26-C32)															0
Lemma et al., 2019		Bale Mountains, Ethiopia	6.9241	39.7024	3960			February				Fresh material										Erica trimera	Soxhlet, DCM:MeOH			1412.77	31	16-35	30.1958	∑Ci x i/ ∑Ci , i=27-33	14.3021	????	21.0182	(∑ odd C27-C33)/ (∑ even C26-C32)															0
Lemma et al., 2019		Bale Mountains, Ethiopia	6.9241	39.7024	3970			February				Fresh material										Erica trimera	Soxhlet, DCM:MeOH			1344.31	31	16-35	30.3367	∑Ci x i/ ∑Ci , i=27-33	16.007	????	25.6064	(∑ odd C27-C33)/ (∑ even C26-C32)															0
Lemma et al., 2019		Bale Mountains, Ethiopia	6.9241	39.7024	3870			February				Fresh material										Poaceae	Soxhlet, DCM:MeOH			387.772	31	17-35	31.1588	∑Ci x i/ ∑Ci , i=27-33	7.26111	????	9.91651	(∑ odd C27-C33)/ (∑ even C26-C32)															0
Lemma et al., 2019		Bale Mountains, Ethiopia	6.9241	39.7024	3920			February				Fresh material										Poaceae	Soxhlet, DCM:MeOH			462.296	31	17-33	30.3874	∑Ci x i/ ∑Ci , i=27-33	14.7337	????	14.9298	(∑ odd C27-C33)/ (∑ even C26-C32)															0
Lemma et al., 2019		Bale Mountains, Ethiopia	6.9241	39.7024	3922			February				Fresh material										Poaceae	Soxhlet, DCM:MeOH			115.581	31	16-33	30.1795	∑Ci x i/ ∑Ci , i=27-33	20.5513	????	24.8601	(∑ odd C27-C33)/ (∑ even C26-C32)															0
Lemma et al., 2019		Bale Mountains, Ethiopia	6.9241	39.7024	3960			February				Fresh material										Poaceae	Soxhlet, DCM:MeOH			509.058	31	17-35	31.1214	∑Ci x i/ ∑Ci , i=27-33	13.6497	????	19.3866	(∑ odd C27-C33)/ (∑ even C26-C32)															0
Lemma et al., 2019		Bale Mountains, Ethiopia	6.9241	39.7024	4070			February				Fresh material										Poaceae	Soxhlet, DCM:MeOH			255.556	31	17-35	31.2475	∑Ci x i/ ∑Ci , i=27-33	20.6106	????	30.7781	(∑ odd C27-C33)/ (∑ even C26-C32)															0
Lemma et al., 2019		Bale Mountains, Ethiopia	6.9241	39.7024	4400			February				Fresh material										Poaceae	Soxhlet, DCM:MeOH			516.934	31	18-35	30.9262	∑Ci x i/ ∑Ci , i=27-33	18.0359	????	25.621	(∑ odd C27-C33)/ (∑ even C26-C32)															0
Lemma et al., 2019		Bale Mountains, Ethiopia	6.9241	39.7024	3930			February				Fresh material										Kniphofia foliosa	Soxhlet, DCM:MeOH			886.287	27	18-35	28.0403	∑Ci x i/ ∑Ci , i=27-33	5.17997	????	5.77425	(∑ odd C27-C33)/ (∑ even C26-C32)															0
Lemma et al., 2019		Bale Mountains, Ethiopia	6.9241	39.7024	3870			February				Fresh material										Alchemilla spp.	Soxhlet, DCM:MeOH			1450.65	31	17-35	30.7184	∑Ci x i/ ∑Ci , i=27-33	39.0207	????	46.6654	(∑ odd C27-C33)/ (∑ even C26-C32)															0
Lemma et al., 2019		Bale Mountains, Ethiopia	6.9241	39.7024	3945			February				Fresh material										Alchemilla spp.	Soxhlet, DCM:MeOH			1088.28	33	17-37	31.9554	∑Ci x i/ ∑Ci , i=27-33	90.8401	????	183.968	(∑ odd C27-C33)/ (∑ even C26-C32)															0
Lemma et al., 2019		Bale Mountains, Ethiopia	6.9241	39.7024	3947			February				Fresh material										Alchemilla spp.	Soxhlet, DCM:MeOH			1594.03	31	17-35	30.7317	∑Ci x i/ ∑Ci , i=27-33	44.0099	????	54.4021	(∑ odd C27-C33)/ (∑ even C26-C32)															0
Lemma et al., 2019		Bale Mountains, Ethiopia	6.9241	39.7024	3947			February				Fresh material										Alchemilla spp.	Soxhlet, DCM:MeOH			3412.42	31	18-35	30.7249	∑Ci x i/ ∑Ci , i=27-33	39.4613	????	47.9138	(∑ odd C27-C33)/ (∑ even C26-C32)															0
Lemma et al., 2019		Bale Mountains, Ethiopia	6.9241	39.7024	4100			February				Fresh material										Alchemilla spp.	Soxhlet, DCM:MeOH			845.238	33	16-37	32.0356	∑Ci x i/ ∑Ci , i=27-33	45.2729	????	60.199	(∑ odd C27-C33)/ (∑ even C26-C32)															0
Lemma et al., 2019		Bale Mountains, Ethiopia	6.9241	39.7024	3955			February				Fresh material										Helichrysum splendidum	Soxhlet, DCM:MeOH			3291.66	31	15-37	30.5437	∑Ci x i/ ∑Ci , i=27-33	16.595	????	24.5937	(∑ odd C27-C33)/ (∑ even C26-C32)															1.46709
Lemma et al., 2019		Bale Mountains, Ethiopia	6.9241	39.7024	4400			February				Fresh material										Helichrysum splendidum	Soxhlet, DCM:MeOH			4138.98	31	15-37	30.459	∑Ci x i/ ∑Ci , i=27-33	10.5219	????	12.9273	(∑ odd C27-C33)/ (∑ even C26-C32)															1.93489
Lemma et al., 2019		Bale Mountains, Ethiopia	6.9241	39.7024	3922			February				Fresh material										Lobelia rhynchopetalum	Soxhlet, DCM:MeOH			263.252	29	16-35	30.001	∑Ci x i/ ∑Ci , i=27-33	7.0476	????	9.63409	(∑ odd C27-C33)/ (∑ even C26-C32)															0
Lemma et al., 2019		Bale Mountains, Ethiopia	6.9241	39.7024	3226			February			Of											Erica arborea	Soxhlet, DCM:MeOH			382.733	31	17-35	30.6528	∑Ci x i/ ∑Ci , i=27-33	12.1282	????	22.8131	(∑ odd C27-C33)/ (∑ even C26-C32)															0
Lemma et al., 2019		Bale Mountains, Ethiopia	6.9241	39.7024	3230			February			Of											Erica arborea	Soxhlet, DCM:MeOH			621.247	31	15-35	30.4935	∑Ci x i/ ∑Ci , i=27-33	14.5771	????	23.9362	(∑ odd C27-C33)/ (∑ even C26-C32)															1.61516
Lemma et al., 2019		Bale Mountains, Ethiopia	6.9241	39.7024	3670			February			Of											Erica arborea	Soxhlet, DCM:MeOH			438.087	31	17-35	30.7737	∑Ci x i/ ∑Ci , i=27-33	14.902	????	25.5285	(∑ odd C27-C33)/ (∑ even C26-C32)															0
Lemma et al., 2019		Bale Mountains, Ethiopia	6.9241	39.7024	3850			February			Of											Erica arborea	Soxhlet, DCM:MeOH			870.705	31	17-35	30.73	∑Ci x i/ ∑Ci , i=27-33	11.0383	????	19.1418	(∑ odd C27-C33)/ (∑ even C26-C32)															0
Lemma et al., 2019		Bale Mountains, Ethiopia	6.9241	39.7024	4210			February			Of											Erica arborea	Soxhlet, DCM:MeOH			1542.76	31	17-35	30.6371	∑Ci x i/ ∑Ci , i=27-33	11.6339	????	19.3885	(∑ odd C27-C33)/ (∑ even C26-C32)															0
Lemma et al., 2019		Bale Mountains, Ethiopia	6.9241	39.7024	3530			February			Of											Erica trimera	Soxhlet, DCM:MeOH			754.475	31	17-35	30.9658	∑Ci x i/ ∑Ci , i=27-33	14.3583	????	26.7306	(∑ odd C27-C33)/ (∑ even C26-C32)															0
Lemma et al., 2019		Bale Mountains, Ethiopia	6.9241	39.7024	3870			February			Of											Erica trimera	Soxhlet, DCM:MeOH			1949.52	31	18-35	30.716	∑Ci x i/ ∑Ci , i=27-33	13.8936	????	24.0315	(∑ odd C27-C33)/ (∑ even C26-C32)															0
Lemma et al., 2019		Bale Mountains, Ethiopia	6.9241	39.7024	3950			February			Of											Erica trimera	Soxhlet, DCM:MeOH			422.703	31	18-35	30.7022	∑Ci x i/ ∑Ci , i=27-33	13.0998	????	23.4365	(∑ odd C27-C33)/ (∑ even C26-C32)															0
Lemma et al., 2019		Bale Mountains, Ethiopia	6.9241	39.7024	3960			February			Of											Erica trimera	Soxhlet, DCM:MeOH			835.411	31	18-35	30.6304	∑Ci x i/ ∑Ci , i=27-33	13.6198	????	21.2653	(∑ odd C27-C33)/ (∑ even C26-C32)															0
Lemma et al., 2019		Bale Mountains, Ethiopia	6.9241	39.7024	3970			February			Of											Erica trimera	Soxhlet, DCM:MeOH			349.953	31	17-35	30.9161	∑Ci x i/ ∑Ci , i=27-33	13.5988	????	21.813	(∑ odd C27-C33)/ (∑ even C26-C32)															0
Lemma et al., 2019		Bale Mountains, Ethiopia	6.9241	39.7024	3920			February			Of											Poaceae	Soxhlet, DCM:MeOH			111.067	31	17-35	30.1548	∑Ci x i/ ∑Ci , i=27-33	10.6359	????	12.4176	(∑ odd C27-C33)/ (∑ even C26-C32)															0
Lemma et al., 2019		Bale Mountains, Ethiopia	6.9241	39.7024	3922			February			Of											Poaceae	Soxhlet, DCM:MeOH			333.067	31	18-35	30.719	∑Ci x i/ ∑Ci , i=27-33	16.1314	????	21.0135	(∑ odd C27-C33)/ (∑ even C26-C32)															0
Lemma et al., 2019		Bale Mountains, Ethiopia	6.9241	39.7024	3930			February			Of											Kniphofia foliosa	Soxhlet, DCM:MeOH			247.999	29	17-33	28.6114	∑Ci x i/ ∑Ci , i=27-33	4.04324	????	4.34178	(∑ odd C27-C33)/ (∑ even C26-C32)															0
Lemma et al., 2019		Bale Mountains, Ethiopia	6.9241	39.7024	3947			February			Of											Alchemilla spp.	Soxhlet, DCM:MeOH			972.363	31	18-35	31.0654	∑Ci x i/ ∑Ci , i=27-33	42.1532	????	58.6765	(∑ odd C27-C33)/ (∑ even C26-C32)															0
Lemma et al., 2019		Bale Mountains, Ethiopia	6.9241	39.7024	4400			February			Of											Helichrysum splendidum	Soxhlet, DCM:MeOH			3054.7	31	17-37	30.6515	∑Ci x i/ ∑Ci , i=27-33	12.9695	????	20.0734	(∑ odd C27-C33)/ (∑ even C26-C32)															0
Lemma et al., 2019		Bale Mountains, Ethiopia	6.9241	39.7024	3226			February			Ah											Erica arborea	Soxhlet, DCM:MeOH			22.396	31	18-35	30.5877	∑Ci x i/ ∑Ci , i=27-33	15.4456	????	24.7225	(∑ odd C27-C33)/ (∑ even C26-C32)															0
Lemma et al., 2019		Bale Mountains, Ethiopia	6.9241	39.7024	3230			February			Ah											Erica arborea	Soxhlet, DCM:MeOH			159.632	31	17-35	30.7138	∑Ci x i/ ∑Ci , i=27-33	13.4001	????	23.9487	(∑ odd C27-C33)/ (∑ even C26-C32)															0
Lemma et al., 2019		Bale Mountains, Ethiopia	6.9241	39.7024	3670			February			Ah											Erica arborea	Soxhlet, DCM:MeOH			103.403	31	17-35	30.7087	∑Ci x i/ ∑Ci , i=27-33	16.5706	????	27.8324	(∑ odd C27-C33)/ (∑ even C26-C32)															0
Lemma et al., 2019		Bale Mountains, Ethiopia	6.9241	39.7024	3850			February			Ah											Erica arborea	Soxhlet, DCM:MeOH			23.7337	31	16-35	30.6342	∑Ci x i/ ∑Ci , i=27-33	7.98671	????	13.0063	(∑ odd C27-C33)/ (∑ even C26-C32)															0
Lemma et al., 2019		Bale Mountains, Ethiopia	6.9241	39.7024	4210			February			Ah											Erica arborea	Soxhlet, DCM:MeOH			20.3664	31	18-36	30.7973	∑Ci x i/ ∑Ci , i=27-33	21.2401	????	20.4105	(∑ odd C27-C33)/ (∑ even C26-C32)															0
Lemma et al., 2019		Bale Mountains, Ethiopia	6.9241	39.7024	4210			February			Ah											Erica arborea	Soxhlet, DCM:MeOH			5.63015	31	18-33	30.0626	∑Ci x i/ ∑Ci , i=27-33	15.3007	????	17.0516	(∑ odd C27-C33)/ (∑ even C26-C32)															0
Lemma et al., 2019		Bale Mountains, Ethiopia	6.9241	39.7024	3530			February			Ah											Erica trimera	Soxhlet, DCM:MeOH			38.8902	31	16-35	30.7966	∑Ci x i/ ∑Ci , i=27-33	10.4381	????	15.124	(∑ odd C27-C33)/ (∑ even C26-C32)															0
Lemma et al., 2019		Bale Mountains, Ethiopia	6.9241	39.7024	3870			February			Ah											Erica trimera	Soxhlet, DCM:MeOH			20.1053	31	18-35	31.2532	∑Ci x i/ ∑Ci , i=27-33	21.4612	????	21.4612	(∑ odd C27-C33)/ (∑ even C26-C32)															0
Lemma et al., 2019		Bale Mountains, Ethiopia	6.9241	39.7024	3950			February			Ah											Erica trimera	Soxhlet, DCM:MeOH			186.524	31	18-35	30.3265	∑Ci x i/ ∑Ci , i=27-33	3.36958	????	4.45487	(∑ odd C27-C33)/ (∑ even C26-C32)															0
Lemma et al., 2019		Bale Mountains, Ethiopia	6.9241	39.7024	3960			February			Ah											Erica trimera	Soxhlet, DCM:MeOH			105.103	31	18-35	30.6391	∑Ci x i/ ∑Ci , i=27-33	6.60745	????	8.99634	(∑ odd C27-C33)/ (∑ even C26-C32)															0
Lemma et al., 2019		Bale Mountains, Ethiopia	6.9241	39.7024	3970			February			Ah											Erica trimera	Soxhlet, DCM:MeOH			97.6629	31	18-35	30.7172	∑Ci x i/ ∑Ci , i=27-33	16.4843	????	24.6405	(∑ odd C27-C33)/ (∑ even C26-C32)															0
Lemma et al., 2019		Bale Mountains, Ethiopia	6.9241	39.7024	3870			February			Ah											Poaceae	Soxhlet, DCM:MeOH			10.6367	31	18-35	31.1753	∑Ci x i/ ∑Ci , i=27-33	37.2309	????	37.2309	(∑ odd C27-C33)/ (∑ even C26-C32)															0
Lemma et al., 2019		Bale Mountains, Ethiopia	6.9241	39.7024	3922			February			Ah											Poaceae	Soxhlet, DCM:MeOH			26.4748	19	18-33	29.69	∑Ci x i/ ∑Ci , i=27-33	2.70042	????	2.94301	(∑ odd C27-C33)/ (∑ even C26-C32)															0
Lemma et al., 2019		Bale Mountains, Ethiopia	6.9241	39.7024	3960			February			Ah											Poaceae	Soxhlet, DCM:MeOH			58.1673	21	18-33	30.9303	∑Ci x i/ ∑Ci , i=27-33	16.3285	????	16.3285	(∑ odd C27-C33)/ (∑ even C26-C32)															0
Lemma et al., 2019		Bale Mountains, Ethiopia	6.9241	39.7024	4070			February			Ah											Poaceae	Soxhlet, DCM:MeOH			22.0688	20	18-35	31.2857	∑Ci x i/ ∑Ci , i=27-33	2.90528	????	4.12169	(∑ odd C27-C33)/ (∑ even C26-C32)															0
Lemma et al., 2019		Bale Mountains, Ethiopia	6.9241	39.7024	4134			February			Ah											Poaceae	Soxhlet, DCM:MeOH			32.8042	31	17-33	30.0926	∑Ci x i/ ∑Ci , i=27-33	4.41065	????	5.45593	(∑ odd C27-C33)/ (∑ even C26-C32)															0
Lemma et al., 2019		Bale Mountains, Ethiopia	6.9241	39.7024	3930			February			Ah											Kniphofia foliosa	Soxhlet, DCM:MeOH			95.1143	31	18-35	29.7873	∑Ci x i/ ∑Ci , i=27-33	7.70531	????	8.42097	(∑ odd C27-C33)/ (∑ even C26-C32)															0
Lemma et al., 2019		Bale Mountains, Ethiopia	6.9241	39.7024	3947			February			Ah											Alchemilla spp.	Soxhlet, DCM:MeOH			72.6123	31	17-35	30.9793	∑Ci x i/ ∑Ci , i=27-33	26.6894	????	40.6983	(∑ odd C27-C33)/ (∑ even C26-C32)															0
Lemma et al., 2019		Bale Mountains, Ethiopia	6.9241	39.7024	4100			February			Ah											Alchemilla spp.	Soxhlet, DCM:MeOH			23.2683	33	18-35	31.4453	∑Ci x i/ ∑Ci , i=27-33	24.3052	????	39.855	(∑ odd C27-C33)/ (∑ even C26-C32)															0
Lemma et al., 2019		Bale Mountains, Ethiopia	6.9241	39.7024	4100			February			Ah											Alchemilla spp.	Soxhlet, DCM:MeOH			19.6765	31	18-35	31.2406	∑Ci x i/ ∑Ci , i=27-33	25.6975	????	34.9702	(∑ odd C27-C33)/ (∑ even C26-C32)															0
Lemma et al., 2019		Bale Mountains, Ethiopia	6.9241	39.7024	3955			February			Ah											Helichrysum splendidum	Soxhlet, DCM:MeOH			125.975	31	18-37	31.0493	∑Ci x i/ ∑Ci , i=27-33	31.1791	????	43.6845	(∑ odd C27-C33)/ (∑ even C26-C32)															0
Lemma et al., 2019		Bale Mountains, Ethiopia	6.9241	39.7024	4400			February			Ah											Helichrysum splendidum	Soxhlet, DCM:MeOH			12.1691	31	17-33	30.6888	∑Ci x i/ ∑Ci , i=27-33	14.3323	????	14.3323	(∑ odd C27-C33)/ (∑ even C26-C32)															0
Li et al., 2018		West Otago, South Island, New Zealand			900	9C-11C	600-900	January				Fresh material										Agrostis capillaris	Sonicated, DCM:MeOH			99.0247	31	21-34	29.6898	∑Ci x i/ ∑Ci , i=27-33			18.98	(∑ odd C27-C33)/ (∑ even C26-C32)
Li et al., 2018		West Otago, South Island, New Zealand			1000	9C-11C	600-900	January				Fresh material										Anthoxanthum odoratum	Sonicated, DCM:MeOH			41.4269	29	21-34	29.5117	∑Ci x i/ ∑Ci , i=27-33			7.03571	(∑ odd C27-C33)/ (∑ even C26-C32)
Li et al., 2018		West Otago, South Island, New Zealand			700	9C-11C	600-900	August				Fresh material										Halocarpus bidwillii	Sonicated, DCM:MeOH			91.6459	33	21-34	30.8273	∑Ci x i/ ∑Ci , i=27-33			5.6767	(∑ odd C27-C33)/ (∑ even C26-C32)
Li et al., 2018		West Otago, South Island, New Zealand			1200	9C-11C	600-900	January				Fresh material										Chionochloa rigida	Sonicated, DCM:MeOH			104.337	31	21-34	30.2202	∑Ci x i/ ∑Ci , i=27-33			22.4904	(∑ odd C27-C33)/ (∑ even C26-C32)
Li et al., 2018		West Otago, South Island, New Zealand			1000	9C-11C	600-900	January				Fresh material										Coprosma petriei	Sonicated, DCM:MeOH			37.2928	31	21-34	29.5612	∑Ci x i/ ∑Ci , i=27-33			4.81394	(∑ odd C27-C33)/ (∑ even C26-C32)
Li et al., 2018		West Otago, South Island, New Zealand			400	9C-11C	600-900	August				Fresh material										Phyllocladus alpinus	Sonicated, DCM:MeOH			185.755	31	21-34	30.5525	∑Ci x i/ ∑Ci , i=27-33			13.1345	(∑ odd C27-C33)/ (∑ even C26-C32)
Li et al., 2018		West Otago, South Island, New Zealand			1300	9C-11C	600-900	January				Fresh material										Dracophyllum pronum	Sonicated, DCM:MeOH			163.604	31	21-34	30.3454	∑Ci x i/ ∑Ci , i=27-33			29.0529	(∑ odd C27-C33)/ (∑ even C26-C32)
Li et al., 2018		West Otago, South Island, New Zealand			1100	9C-11C	600-900	January				Fresh material										Festuca novae-zelandiae	Sonicated, DCM:MeOH			59.5754	29	21-34	29.7856	∑Ci x i/ ∑Ci , i=27-33			18.3589	(∑ odd C27-C33)/ (∑ even C26-C32)
Li et al., 2018		West Otago, South Island, New Zealand			1100	9C-11C	600-900	January				Fresh material										Hieracium lepidulum	Sonicated, DCM:MeOH			94.9406	31	21-34	29.8922	∑Ci x i/ ∑Ci , i=27-33			9.08923	(∑ odd C27-C33)/ (∑ even C26-C32)
Li et al., 2018		West Otago, South Island, New Zealand			1200	9C-11C	600-900	January				Fresh material										Leucopogon fraseri	Sonicated, DCM:MeOH			53.2584	31	21-34	29.9872	∑Ci x i/ ∑Ci , i=27-33			7.80689	(∑ odd C27-C33)/ (∑ even C26-C32)
Li et al., 2018		West Otago, South Island, New Zealand			700	9C-11C	600-900	August				Fresh material										Fuscospora cliffortioides	Sonicated, DCM:MeOH			338.004	25	21-34	28.9269	∑Ci x i/ ∑Ci , i=27-33			14.2699	(∑ odd C27-C33)/ (∑ even C26-C32)
Li et al., 2018		West Otago, South Island, New Zealand			900	9C-11C	600-900	January				Fresh material										Melicytus alpinus	Sonicated, DCM:MeOH			114.519	29	21-34	28.9783	∑Ci x i/ ∑Ci , i=27-33			15.8061	(∑ odd C27-C33)/ (∑ even C26-C32)
Li et al., 2018		West Otago, South Island, New Zealand			400	9C-11C	600-900	August				Fresh material										Podocarpus laetus	Sonicated, DCM:MeOH			160.163	31	21-34	29.6806	∑Ci x i/ ∑Ci , i=27-33			21.6014	(∑ odd C27-C33)/ (∑ even C26-C32)
Li et al., 2018		West Otago, South Island, New Zealand			1000	9C-11C	600-900	January				Fresh material										Pilosella officinarum	Sonicated, DCM:MeOH			136.014	31	21-34	30.5138	∑Ci x i/ ∑Ci , i=27-33			18.4188	(∑ odd C27-C33)/ (∑ even C26-C32)
Li et al., 2018		West Otago, South Island, New Zealand			800	9C-11C	600-900	January				Fresh material										Poa cita	Sonicated, DCM:MeOH			120.181	31	21-34	29.955	∑Ci x i/ ∑Ci , i=27-33			21.7988	(∑ odd C27-C33)/ (∑ even C26-C32)
Li et al., 2018		West Otago, South Island, New Zealand			1100	9C-11C	600-900	January				Fresh material										Raoulia subsericea	Sonicated, DCM:MeOH			55.8476	31	21-34	29.9933	∑Ci x i/ ∑Ci , i=27-33			7.05238	(∑ odd C27-C33)/ (∑ even C26-C32)
Li et al., 2018		West Otago, South Island, New Zealand			400	9C-11C	600-900	August				Fresh material										Fuscospora fusca	Sonicated, DCM:MeOH			389.911	25	21-34	29.4914	∑Ci x i/ ∑Ci , i=27-33			8.23492	(∑ odd C27-C33)/ (∑ even C26-C32)
Li et al., 2018		West Otago, South Island, New Zealand			400	9C-11C	600-900	August				Fresh material										Lophozonia menziesii	Sonicated, DCM:MeOH			230.199	27	21-34	28.6557	∑Ci x i/ ∑Ci , i=27-33			15.9213	(∑ odd C27-C33)/ (∑ even C26-C32)
Li et al., 2018		West Otago, South Island, New Zealand			700	9C-11C	600-900		0	0.1			Typic Haplorthods									Halocarpus bidwillii Soil	Sonicated, DCM:MeOH			10.591	27	21-34	28.832	∑Ci x i/ ∑Ci , i=27-33			5.43842	(∑ odd C27-C33)/ (∑ even C26-C32)
Li et al., 2018		West Otago, South Island, New Zealand			400	9C-11C	600-900		0	0.1												Phyllocladus alpinus Soil	Sonicated, DCM:MeOH			15.9328	31	21-34	29.297	∑Ci x i/ ∑Ci , i=27-33			6.00919	(∑ odd C27-C33)/ (∑ even C26-C32)
Li et al., 2018		West Otago, South Island, New Zealand			1000	9C-11C	600-900		0	0.1												Pilosella officinarum Soil	Sonicated, DCM:MeOH			14.9092	27	21-34	29.1033	∑Ci x i/ ∑Ci , i=27-33			6.43978	(∑ odd C27-C33)/ (∑ even C26-C32)
Li et al., 2018		West Otago, South Island, New Zealand			1000	9C-11C	600-900		0	0.1												Anthoxanthum odoratum Soil	Sonicated, DCM:MeOH			9.38418	31	21-34	29.367	∑Ci x i/ ∑Ci , i=27-33			3.44582	(∑ odd C27-C33)/ (∑ even C26-C32)
Li et al., 2018		West Otago, South Island, New Zealand			1000	9C-11C	600-900		0	0.1												Coprosma petriei Soil	Sonicated, DCM:MeOH			12.7201	31	21-34	29.3107	∑Ci x i/ ∑Ci , i=27-33			5.84777	(∑ odd C27-C33)/ (∑ even C26-C32)
Li et al., 2018		West Otago, South Island, New Zealand			1100	9C-11C	600-900		0	0.1												Raoulia subsericea Soil	Sonicated, DCM:MeOH			11.044	31	21-34	29.5184	∑Ci x i/ ∑Ci , i=27-33			4.84287	(∑ odd C27-C33)/ (∑ even C26-C32)
Li et al., 2018		West Otago, South Island, New Zealand			1100	9C-11C	600-900		0	0.1												Festuca novae-zelandiae Soil	Sonicated, DCM:MeOH			11.9791	31	21-34	29.4388	∑Ci x i/ ∑Ci , i=27-33			3.83054	(∑ odd C27-C33)/ (∑ even C26-C32)
Li et al., 2018		West Otago, South Island, New Zealand			1100	9C-11C	600-900		0	0.1												Hieracium lepidulum Soil	Sonicated, DCM:MeOH			16.872	31	21-34	29.9943	∑Ci x i/ ∑Ci , i=27-33			7.30304	(∑ odd C27-C33)/ (∑ even C26-C32)
Li et al., 2018		West Otago, South Island, New Zealand			1200	9C-11C	600-900		0	0.1												Chionochloa rigida Soil	Sonicated, DCM:MeOH			11.699	31	21-34	29.6709	∑Ci x i/ ∑Ci , i=27-33			4.63369	(∑ odd C27-C33)/ (∑ even C26-C32)
Li et al., 2018		West Otago, South Island, New Zealand			1200	9C-11C	600-900		0	0.1												Leucopogon fraseri Soil	Sonicated, DCM:MeOH			9.94207	31	21-34	29.6745	∑Ci x i/ ∑Ci , i=27-33			4.49351	(∑ odd C27-C33)/ (∑ even C26-C32)
Li et al., 2018		West Otago, South Island, New Zealand			1300	9C-11C	600-900		0	0.1												Dracophyllum pronum Soil	Sonicated, DCM:MeOH			13.8162	31	21-34	29.6061	∑Ci x i/ ∑Ci , i=27-33			5.29757	(∑ odd C27-C33)/ (∑ even C26-C32)
Li et al., 2018		West Otago, South Island, New Zealand			800	9C-11C	600-900		0	0.1												Poa cita Soil	Sonicated, DCM:MeOH			10.392	31	21-34	29.2628	∑Ci x i/ ∑Ci , i=27-33			3.57342	(∑ odd C27-C33)/ (∑ even C26-C32)
Li et al., 2018		West Otago, South Island, New Zealand			900	9C-11C	600-900		0	0.1												Melicytus alpinus Soil	Sonicated, DCM:MeOH			22.1318	31	21-34	29.4327	∑Ci x i/ ∑Ci , i=27-33			8.97356	(∑ odd C27-C33)/ (∑ even C26-C32)
Li et al., 2018		West Otago, South Island, New Zealand			900	9C-11C	600-900		0	0.1												Agrostis capillaris Soil	Sonicated, DCM:MeOH			9.98357	31	21-34	29.2533	∑Ci x i/ ∑Ci , i=27-33			3.29528	(∑ odd C27-C33)/ (∑ even C26-C32)
Li et al., 2018		West Otago, South Island, New Zealand			700	9C-11C	600-900		0	0.1												Fuscospora cliffortioides Soil	Sonicated, DCM:MeOH			59.9591	25	21-34	28.6196	∑Ci x i/ ∑Ci , i=27-33			11.3169	(∑ odd C27-C33)/ (∑ even C26-C32)
Li et al., 2018		West Otago, South Island, New Zealand			400	9C-11C	600-900		0	0.1												Podocarpus laetus Soil	Sonicated, DCM:MeOH			36.6512	27	21-34	28.8498	∑Ci x i/ ∑Ci , i=27-33			12.4625	(∑ odd C27-C33)/ (∑ even C26-C32)
Li et al., 2018		West Otago, South Island, New Zealand			400	9C-11C	600-900		0	0.1												Fuscospora fusca Soil	Sonicated, DCM:MeOH			35.5401	27	21-34	28.9202	∑Ci x i/ ∑Ci , i=27-33			13.4412	(∑ odd C27-C33)/ (∑ even C26-C32)
Li et al., 2018		West Otago, South Island, New Zealand			400	9C-11C	600-900		0	0.1												Lophozonia menziesii Soil	Sonicated, DCM:MeOH			32.2858	27	21-34	28.6611	∑Ci x i/ ∑Ci , i=27-33			12.2241	(∑ odd C27-C33)/ (∑ even C26-C32)
Li et al., 2018		West Otago, South Island, New Zealand			1000	9C-11C	600-900		0	0.1												Fuscospora fusca dominated Soil	Sonicated, DCM:MeOH			7.71188	31	21-34	29.6266	∑Ci x i/ ∑Ci , i=27-33			3.85868	(∑ odd C27-C33)/ (∑ even C26-C32)
Li et al., 2018		West Otago, South Island, New Zealand			1100	9C-11C	600-900		0	0.1												Fuscospora fusca dominated Soil	Sonicated, DCM:MeOH			9.93095	31	21-34	29.5743	∑Ci x i/ ∑Ci , i=27-33			3.93242	(∑ odd C27-C33)/ (∑ even C26-C32)
Li et al., 2018		West Otago, South Island, New Zealand			1200	9C-11C	600-900		0	0.1												Fuscospora fusca dominated Soil	Sonicated, DCM:MeOH			10.3356	31	21-34	29.4628	∑Ci x i/ ∑Ci , i=27-33			4.40781	(∑ odd C27-C33)/ (∑ even C26-C32)
Li et al., 2018		West Otago, South Island, New Zealand			1200	9C-11C	600-900		0	0.1												Chionochloa rigida dominated Soil	Sonicated, DCM:MeOH			20.0057	31	21-34	29.5238	∑Ci x i/ ∑Ci , i=27-33			4.4345	(∑ odd C27-C33)/ (∑ even C26-C32)
Li et al., 2018		West Otago, South Island, New Zealand			1300	9C-11C	600-900		0	0.1												Chionochloa rigida dominated Soil	Sonicated, DCM:MeOH			12.0958	31	21-34	29.4963	∑Ci x i/ ∑Ci , i=27-33			4.66853	(∑ odd C27-C33)/ (∑ even C26-C32)
Li et al., 2018		West Otago, South Island, New Zealand			1300	9C-11C	600-900		0	0.1												Chionochloa rigida dominated Soil	Sonicated, DCM:MeOH			10.5424	31	21-34	29.6132	∑Ci x i/ ∑Ci , i=27-33			5.28365	(∑ odd C27-C33)/ (∑ even C26-C32)
Li et al., 2018		West Otago, South Island, New Zealand			1300	9C-11C	600-900		0	0.1												Leucopogon fraseri dominated Soil	Sonicated, DCM:MeOH			15.4244	31	21-34	29.8076	∑Ci x i/ ∑Ci , i=27-33			7.88918	(∑ odd C27-C33)/ (∑ even C26-C32)
Li et al., 2018		West Otago, South Island, New Zealand			800	9C-11C	600-900		0	0.1												Poa cita dominated Soil	Sonicated, DCM:MeOH			10.1179	25	21-34	29.1278	∑Ci x i/ ∑Ci , i=27-33			2.1941	(∑ odd C27-C33)/ (∑ even C26-C32)
Li et al., 2018		West Otago, South Island, New Zealand			800	9C-11C	600-900		0	0.1												Agrostis capillaris dominated Soil	Sonicated, DCM:MeOH			17.2402	23	21-34	28.863	∑Ci x i/ ∑Ci , i=27-33			1.58528	(∑ odd C27-C33)/ (∑ even C26-C32)
Li et al., 2018		West Otago, South Island, New Zealand			800	9C-11C	600-900		0	0.1												Agrostis capillaris dominated Soil	Sonicated, DCM:MeOH			7.93992	31	21-34	29.3109	∑Ci x i/ ∑Ci , i=27-33			3.30611	(∑ odd C27-C33)/ (∑ even C26-C32)
Li et al., 2018		West Otago, South Island, New Zealand			900	9C-11C	600-900		0	0.1												Melicytus alpinus dominated Soil	Sonicated, DCM:MeOH			22.6889	31	21-34	29.3923	∑Ci x i/ ∑Ci , i=27-33			9.01963	(∑ odd C27-C33)/ (∑ even C26-C32)
Li et al., 2018		West Otago, South Island, New Zealand			900	9C-11C	600-900		0	0.1												Fuscospora fusca dominated Soil	Sonicated, DCM:MeOH			7.07503	31	21-34	29.5299	∑Ci x i/ ∑Ci , i=27-33			3.44584	(∑ odd C27-C33)/ (∑ even C26-C32)
Marseille et al., 1999	Sapine	Mont-Lozère, France	44.4261	3.73917	1300-1500			October				Fresh leaves	Ranker and Dystric Podzoluvisol								Fagus sylvatica	Fagus sylvatica	Sonicated, Pentane:acetone				27	23-30
Marseille et al., 1999	Sapine	Mont-Lozère, France	44.4261	3.73917	1300-1500			October	0	0.02	OL1		Ranker and Dystric Podzoluvisol	ND				36		41.29	Fagus sylvatica	Fagus sylvatica	Sonicated, Pentane:acetone				27	21-31
Marseille et al., 1999	Sapine	Mont-Lozère, France	44.4261	3.73917	1300-1500			October	0.02	0.04	OL2		Ranker and Dystric Podzoluvisol	ND				32		36.78	Fagus sylvatica	Vaccinium myrtillus	Sonicated, Pentane:acetone				27	21-29
Marseille et al., 1999	Sapine	Mont-Lozère, France	44.4261	3.73917	1300-1500			October	0.04	0.06	OF		Ranker and Dystric Podzoluvisol	ND				22		32.25	Fagus sylvatica	Calluna vulgaris	Sonicated, Pentane:acetone				27	21-31
Marseille et al., 1999	Sapine	Mont-Lozère, France	44.4261	3.73917	1300-1500			October	0.06	0.08	OH		Ranker and Dystric Podzoluvisol	4.2				22		28.02	Fagus sylvatica		Sonicated, Pentane:acetone				27	21-31
Marseille et al., 1999	Sapine	Mont-Lozère, France	44.4261	3.73917	1300-1500			October	0.08	0.11	A11		Ranker and Dystric Podzoluvisol	5.2				21		5.93	Fagus sylvatica		Sonicated, Pentane:acetone				25	21-31
Marseille et al., 1999	Sapine	Mont-Lozère, France	44.4261	3.73917	1300-1500			October	0.23	0.25	A13		Ranker and Dystric Podzoluvisol	5.4				ND		4.9	Fagus sylvatica		Sonicated, Pentane:acetone
Marseille et al., 1999	Sapine	Mont-Lozère, France	44.4261	3.73917	1300-1500			October	0.28	0.3	A14		Ranker and Dystric Podzoluvisol	5.3				22		3.56	Fagus sylvatica		Sonicated, Pentane:acetone
Marseille et al., 1999	Sapine	Mont-Lozère, France	44.4261	3.73917	1300-1500			October				Fresh needles	Ranker and Dystric Podzoluvisol								Picea abies	Piceaabies	Sonicated, Pentane:acetone				27	21-31
Marseille et al., 1999	Latte	Mont-Lozère, France	44.4261	3.73917	1300-1500			October	0	0.01	OL		Ranker and Dystric Podzoluvisol	4.5				24		43.63	Picea abies	Picea abies	Sonicated, Pentane:acetone				27	21-31
Marseille et al., 1999	Latte	Mont-Lozère, France	44.4261	3.73917	1300-1500			October	0.01	0.03	OF		Ranker and Dystric Podzoluvisol	ND				24		32.45	Picea abies	Sorbus aucuparia	Sonicated, Pentane:acetone				27	21-31
Marseille et al., 1999	Latte	Mont-Lozère, France	44.4261	3.73917	1300-1500			October	0.03	0.06	OH		Ranker and Dystric Podzoluvisol	4.1				24		26.63	Picea abies	Deschampsia flexuosa	Sonicated, Pentane:acetone				27	21-31
Marseille et al., 1999	Latte	Mont-Lozère, France	44.4261	3.73917	1300-1500			October	0.1	0.12	A12		Ranker and Dystric Podzoluvisol	4.9				18		4.84	Picea abies	Oxalis acetosella	Sonicated, Pentane:acetone				25	23-31
Marseille et al., 1999	Latte	Mont-Lozère, France	44.4261	3.73917	1300-1500			October	0.28	0.3	A15		Ranker and Dystric Podzoluvisol	5.6				16		2.82	Picea abies		Sonicated, Pentane:acetone				25	21-31
Marseille et al., 1999	Latte	Mont-Lozère, France	44.4261	3.73917	1300-1500			October				Grass roots and rhizomes	Ranker and Dystric Podzoluvisol								Picea abies		Sonicated, Pentane:acetone				31	21-33
Marseille et al., 1999	Cloutasses	Mont-Lozère, France	44.4261	3.73917	1300-1500			October	0	0.06	A11		Ranker and Dystric Podzoluvisol	4.5				13		6.12	Grassland	Festuca ovina	Sonicated, Pentane:acetone				29	21-33
Marseille et al., 1999	Cloutasses	Mont-Lozère, France	44.4261	3.73917	1300-1500			October	0.06	0.1	A12		Ranker and Dystric Podzoluvisol	4.4				13		3.9	Grassland	Festuca rubra	Sonicated, Pentane:acetone				31	21-33
Marseille et al., 1999	Cloutasses	Mont-Lozère, France	44.4261	3.73917	1300-1500			October	0.1	0.15	A13		Ranker and Dystric Podzoluvisol	4.5				12		3.18	Grassland	Nardus stricta	Sonicated, Pentane:acetone				29	21-33
Marseille et al., 1999	Cloutasses	Mont-Lozère, France	44.4261	3.73917	1300-1500			October	0.26	0.28	A1/B		Ranker and Dystric Podzoluvisol	4.6				12		3.1	Grassland	Cytisus purgans	Sonicated, Pentane:acetone
Naafs et al., 2004		Madeira Island (Portugal)	32.7595	-16.8958	1175			February	0				Andisol	4.5				13.4		8.4			Soxhlet, DCM:MeOH				31	25-31
Naafs et al., 2004		Madeira Island (Portugal)	32.7595	-16.8958	1175				0.1	0.2				4				12.4		7.1			Soxhlet, DCM:MeOH				31	23-33
Naafs et al., 2004		Madeira Island (Portugal)	32.7595	-16.8958	1175				0.2	0.3				4.2				13		6.7			Soxhlet, DCM:MeOH				31	23-33
Nguyen Tu et al., 2001		Massif Central, France	45.1093	2.6753				September				Fresh leaves											Dipping, n-heptane	17.6			27	21-35
Nguyen Tu et al., 2001		Massif Central, France	45.1093	2.6753				December				Senescent leaves											Dipping, n-heptane	13.4			27	21-35
Nguyen Tu et al., 2001		Massif Central, France	45.1093	2.6753				January				Litter											Dipping, n-heptane	11.9			27	25-35
Otto and Simpson., 2005	Brown Chernozem	Lethbridge, Alberta, Canada	49.8659	-112.826								Fresh material	Brown Chernozem	6-6.9					46			Agropyron smithii	Sonicated, DCM:MeOH		487		31	23-31
Otto and Simpson., 2005	Brown Chernozem	Lethbridge, Alberta, Canada	49.8659	-112.826								Litter	Brown Chernozem	6-6.9					34.8			Agropyron smithii	Sonicated, DCM:MeOH		165		29	25-31
Otto and Simpson., 2005	Brown Chernozem	Lethbridge, Alberta, Canada	49.8659	-112.826							Ah		Brown Chernozem	6-6.9					2.1			Agropyron smithii	Sonicated, DCM:MeOH		22		29	25-31
Otto and Simpson., 2005	Dark Brown Chernozem	Lethbridge, Alberta, Canada	49.8659	-112.826								Fresh material	Dark Brown Chernozem	6-6.9					44.2			Agropyron smithii	Sonicated, DCM:MeOH		317		29	25-31
Otto and Simpson., 2005	Dark Brown Chernozem	Lethbridge, Alberta, Canada	49.8659	-112.826							Ah		Dark Brown Chernozem	6-6.9					2.8			Agropyron smithii	Sonicated, DCM:MeOH		43		31	25-33
Otto and Simpson., 2005	Dark Gray Chernozem	Strathcona County, Alberta, Canada	54.2117	-113.028								Senescent leaves	Dark Gray Chernozem						50.9			Populus tremula	Sonicated, DCM:MeOH		1324		25	23-27
Otto and Simpson., 2005	Dark Gray Chernozem	Strathcona County, Alberta, Canada	54.2117	-113.028							O		Dark Gray Chernozem						14.2			Populus tremula	Sonicated, DCM:MeOH		160		27	23-31
Otto and Simpson., 2005	Dark Gray Chernozem	Strathcona County, Alberta, Canada	54.2117	-113.028							Ah		Dark Gray Chernozem						5			Populus tremula	Sonicated, DCM:MeOH		9		27	27-29
Otto and Simpson., 2005	Eutric Brunisol	Hinton, Alberta, Canada	53.4219	-117.576								Fresh material	Eutric Brunisol						50.5			Pinus contorta	Sonicated, DCM:MeOH
Otto and Simpson., 2005	Eutric Brunisol	Hinton, Alberta, Canada	53.4219	-117.576								Litter	Eutric Brunisol						52			Pinus contorta	Sonicated, DCM:MeOH		35		29	27-31
Otto and Simpson., 2005	Eutric Brunisol	Hinton, Alberta, Canada	53.4219	-117.576							O		Eutric Brunisol						23.1			Pinus contorta	Sonicated, DCM:MeOH		40		31	29-31
Schäfer et al., 2016	BRO		50.2147	15.51	245	7	570		0	0.03	Ah1										Poaceae		Microwave, DCM:MeOH			7.2	31	25-35	30.5	∑Ci x i/ ∑Ci , i=27-33			5.7	(∑ odd C27-C33)/ (∑ even C26-C32)
Schäfer et al., 2016	BRO		50.2147	15.51	245	7	570		0.03	0.1	Ah2										Poaceae		Microwave, DCM:MeOH			5.4	31	25-35	30.3	∑Ci x i/ ∑Ci , i=27-33			4.2	(∑ odd C27-C33)/ (∑ even C26-C32)
Schäfer et al., 2016	HUB		46.2831	21.24	117	10	506		0	0.03	Ah1										Rubiaceae, Poaceae, Ranunculaceae, Fabaceae, Apiaceae, Rosaceae		Microwave, DCM:MeOH			4.6	31	25-35	30.3	∑Ci x i/ ∑Ci , i=27-33			3.5	(∑ odd C27-C33)/ (∑ even C26-C32)
Schäfer et al., 2016	HUB		46.2831	21.24	117	10	506		0.03	0.1	Ah2										Rubiaceae, Poaceae, Ranunculaceae, Fabaceae, Apiaceae, Rosaceae		Microwave, DCM:MeOH			3.4	31	25-35	30.2	∑Ci x i/ ∑Ci , i=27-33			2.8	(∑ odd C27-C33)/ (∑ even C26-C32)
Schäfer et al., 2016	HUG		46.9624	18.02	107	11	520		0	0.03	Ah1										Brachypodium pinnatum, Bromus erectus, other Poaceae		Microwave, DCM:MeOH			6.9	31	25-35	29.8	∑Ci x i/ ∑Ci , i=27-33			4.3	(∑ odd C27-C33)/ (∑ even C26-C32)
Schäfer et al., 2016	HUG		46.9624	18.02	107	11	520		0.03	0.1	Ah2										Brachypodium pinnatum, Bromus erectus, other Poaceae		Microwave, DCM:MeOH			5.2	29	25-35	29.9	∑Ci x i/ ∑Ci , i=27-33			3.4	(∑ odd C27-C33)/ (∑ even C26-C32)
Schäfer et al., 2016	HUM		47.4992	19.14	185	10	620		0	0.03	Ah1										Brachypodium pinnatum, other Poaceae, Lamiaceae, Asteraceae, Fabaceae, Rubiaceae, Apiaceae, Apiaceae		Microwave, DCM:MeOH			6.2	29	25-35	29.8	∑Ci x i/ ∑Ci , i=27-33			4	(∑ odd C27-C33)/ (∑ even C26-C32)
Schäfer et al., 2016	HUM		47.4992	19.14	185	10	620		0.03	0.1	Ah2										Brachypodium pinnatum, other Poaceae, Lamiaceae, Asteraceae, Fabaceae, Rubiaceae, Apiaceae, Apiaceae		Microwave, DCM:MeOH			4.6	29	25-35	29.8	∑Ci x i/ ∑Ci , i=27-33			3	(∑ odd C27-C33)/ (∑ even C26-C32)
Schäfer et al., 2016	HUR		48.1	20.48	119	8	560		0	0.03	Ah1										Poaceae e Festuca rupicola, Ranunculales, Plantaginaceae, Lamiaceae, Polygonaceae, Rosaceae, Convolvulaceae		Microwave, DCM:MeOH			6.1	31	25-35	30	∑Ci x i/ ∑Ci , i=27-33			3.3	(∑ odd C27-C33)/ (∑ even C26-C32)
Schäfer et al., 2016	HUR		48.1	20.48	119	8	560		0.03	0.1	Ah2										Poaceae e Festuca rupicola, Ranunculales, Plantaginaceae, Lamiaceae, Polygonaceae, Rosaceae, Convolvulaceae		Microwave, DCM:MeOH			2.9	31	25-35	30.1	∑Ci x i/ ∑Ci , i=27-33			2	(∑ odd C27-C33)/ (∑ even C26-C32)
Schäfer et al., 2016	KOC		50.3503	14.15	360	8	470		0	0.03	Ah1										Fragaria sp., Festuca pallens		Microwave, DCM:MeOH			4.1	31	25-35	30.3	∑Ci x i/ ∑Ci , i=27-33			3.8	(∑ odd C27-C33)/ (∑ even C26-C32)
Schäfer et al., 2016	KOC		50.3503	14.15	360	8	470		0.03	0.1	Ah2										Fragaria sp., Festuca pallens		Microwave, DCM:MeOH			3.5	31	25-35	30.1	∑Ci x i/ ∑Ci , i=27-33			3.2	(∑ odd C27-C33)/ (∑ even C26-C32)
Schäfer et al., 2016	L01		47.4992	18.45	185	10	620		0	0.03	Ah1										Mowed grassland. Surroundings characterised by agriculture		Microwave, DCM:MeOH			2.8	31	25-35	30.2	∑Ci x i/ ∑Ci , i=27-33			2.7	(∑ odd C27-C33)/ (∑ even C26-C32)
Schäfer et al., 2016	L01		47.4992	18.45	185	10	620		0.03	0.1	Ah2										Mowed grassland. Surroundings characterised by agriculture		Microwave, DCM:MeOH			2.4	31	25-35	30.2	∑Ci x i/ ∑Ci , i=27-33			2.2	(∑ odd C27-C33)/ (∑ even C26-C32)
Schäfer et al., 2016	L02		46.0547	18.04	202	11	630		0	0.03	Ah1										Extensively used grassland		Microwave, DCM:MeOH			2.2	29,31	25-35	30.1	∑Ci x i/ ∑Ci , i=27-33			1.7	(∑ odd C27-C33)/ (∑ even C26-C32)
Schäfer et al., 2016	L02		46.0547	18.04	202	11	630		0.03	0.1	Ah2										Extensively used grassland		Microwave, DCM:MeOH			2	29,31	25-35	30.2	∑Ci x i/ ∑Ci , i=27-33			1.8	(∑ odd C27-C33)/ (∑ even C26-C32)
Schäfer et al., 2016	L03		45.6515	17.03	161	11	880		0	0.03	Ah1										Mowed meadow		Microwave, DCM:MeOH			3.4	31	25-35	30.3	∑Ci x i/ ∑Ci , i=27-33			3	(∑ odd C27-C33)/ (∑ even C26-C32)
Schäfer et al., 2016	L03		45.6515	17.03	161	11	880		0.03	0.1	Ah2										Mowed meadow		Microwave, DCM:MeOH			3.2	31	25-35	30.3	∑Ci x i/ ∑Ci , i=27-33			3	(∑ odd C27-C33)/ (∑ even C26-C32)
Schäfer et al., 2016	L04		46.0282	14.26	361	8	620		0	0.03	Ah1										Mowed meadow		Microwave, DCM:MeOH			2.4	31	25-35	30.2	∑Ci x i/ ∑Ci , i=27-33			2	(∑ odd C27-C33)/ (∑ even C26-C32)
Schäfer et al., 2016	L04		46.0282	14.26	361	8	620		0.03	0.1	Ah2										Mowed meadow		Microwave, DCM:MeOH			2.4	29,31	25-35	30.2	∑Ci x i/ ∑Ci , i=27-33			2	(∑ odd C27-C33)/ (∑ even C26-C32)
Schäfer et al., 2016	L05		47.8879	16.53	146	10.1	574.3		0	0.03	Ah1										Grassland stripe in cultivated area		Microwave, DCM:MeOH			2.6	31	25-35	30.1	∑Ci x i/ ∑Ci , i=27-33			2.2	(∑ odd C27-C33)/ (∑ even C26-C32)
Schäfer et al., 2016	L05		47.8879	16.53	146	10.1	574.3		0.03	0.1	Ah2										Grassland stripe in cultivated area		Microwave, DCM:MeOH			2.1	31	25-35	30.1	∑Ci x i/ ∑Ci , i=27-33			1.8	(∑ odd C27-C33)/ (∑ even C26-C32)
Schäfer et al., 2016	L06		48.1505	15.58	327	9.9	623.9		0	0.03	Ah1										Cultivated meadow, mowed. Intensive agricultural use		Microwave, DCM:MeOH			2.9	29,31	25-35	29.9	∑Ci x i/ ∑Ci , i=27-33			2.4	(∑ odd C27-C33)/ (∑ even C26-C32)
Schäfer et al., 2016	L06		48.1505	15.58	327	9.9	623.9		0.03	0.1	Ah2										Cultivated meadow, mowed. Intensive agricultural use		Microwave, DCM:MeOH			3.5	31	25-35	30	∑Ci x i/ ∑Ci , i=27-33			2.9	(∑ odd C27-C33)/ (∑ even C26-C32)
Schäfer et al., 2016	L07		48.132	14.36	559	8.2	1133.6		0	0.03	Ah1										Cultivated meadow, next to a forest		Microwave, DCM:MeOH			3.2	31	25-35	30.1	∑Ci x i/ ∑Ci , i=27-33			3.4	(∑ odd C27-C33)/ (∑ even C26-C32)
Schäfer et al., 2016	L07		48.132	14.36	559	8.2	1133.6		0.03	0.1	Ah2										Cultivated meadow, next to a forest		Microwave, DCM:MeOH			3.2	29,31	25-35	30.2	∑Ci x i/ ∑Ci , i=27-33			3.2	(∑ odd C27-C33)/ (∑ even C26-C32)
Schäfer et al., 2016	L08		48.7439	12.44	408	8	870		0	0.03	Ah1										Cultivated meadow		Microwave, DCM:MeOH			3	31	25-35	30.1	∑Ci x i/ ∑Ci , i=27-33			2.5	(∑ odd C27-C33)/ (∑ even C26-C32)
Schäfer et al., 2016	L08		48.7439	12.44	408	8	870		0.03	0.1	Ah2										Cultivated meadow		Microwave, DCM:MeOH			2.7	29,31	25-35	30	∑Ci x i/ ∑Ci , i=27-33			2.3	(∑ odd C27-C33)/ (∑ even C26-C32)
Schäfer et al., 2016	L09		48.298	13.24	426	8.3	949.8		0	0.03	Ah1										Mown grassland strip (approx. 30m) between forest and field		Microwave, DCM:MeOH			2.7	31	25-35	30.2	∑Ci x i/ ∑Ci , i=27-33			2.3	(∑ odd C27-C33)/ (∑ even C26-C32)
Schäfer et al., 2016	L09		48.298	13.24	426	8.3	949.8		0.03	0.1	Ah2										Mown grassland strip (approx. 30m) between forest and field		Microwave, DCM:MeOH			3.3	31	25-35	30.2	∑Ci x i/ ∑Ci , i=27-33			2.8	(∑ odd C27-C33)/ (∑ even C26-C32)
Schäfer et al., 2016	L10		47.0282	14.26	450	9	1330		0	0.03	Ah1										Mowed meadow, agriculturally used		Microwave, DCM:MeOH			5.1	31	25-35	30	∑Ci x i/ ∑Ci , i=27-33			4.5	(∑ odd C27-C33)/ (∑ even C26-C32)
Schäfer et al., 2016	L11		47.38	10.29	886	6.6	1742					Litter									spruce forest, steep hillside		Microwave, DCM:MeOH			1.44	29,31	25-33	29.8	∑Ci x i/ ∑Ci , i=27-33			5.2	(∑ odd C27-C33)/ (∑ even C26-C32)
Schäfer et al., 2016	L11		47.38	10.29	886	6.6	1742		0	0.03	Ah1										spruce forest, steep hillside		Microwave, DCM:MeOH			8.3	31	25-35	30.4	∑Ci x i/ ∑Ci , i=27-33			9.2	(∑ odd C27-C33)/ (∑ even C26-C32)
Schäfer et al., 2016	L11		47.38	10.29	886	6.6	1742		0.03	0.1	Ah2										spruce forest, steep hillside		Microwave, DCM:MeOH			2.05	31	25-33	30.1	∑Ci x i/ ∑Ci , i=27-33			9.7	(∑ odd C27-C33)/ (∑ even C26-C32)
Schäfer et al., 2016	L11		47.38	10.29	899	6.6	1742					Litter									beech forest, close to fir stand		Microwave, DCM:MeOH			25.79	27	25-33	27.4	∑Ci x i/ ∑Ci , i=27-33			21.5	(∑ odd C27-C33)/ (∑ even C26-C32)
Schäfer et al., 2016	L11		47.38	10.29	899	6.6	1742		0	0.03	Ah1										beech forest, close to fir stand		Microwave, DCM:MeOH			6.64	27	25-33	28	∑Ci x i/ ∑Ci , i=27-33			10.1	(∑ odd C27-C33)/ (∑ even C26-C32)
Schäfer et al., 2016	L11		47.38	10.29	899	6.6	1742		0.03	0.1	Ah2										beech forest, close to fir stand		Microwave, DCM:MeOH			2.09	27	25-35	29.4	∑Ci x i/ ∑Ci , i=27-33			3.2	(∑ odd C27-C33)/ (∑ even C26-C32)
Schäfer et al., 2016	L12		47.8	11.02	889	7.2	1175					Litter									fir forest		Microwave, DCM:MeOH			29.94	31	25-35	30.6	∑Ci x i/ ∑Ci , i=27-33			14.7	(∑ odd C27-C33)/ (∑ even C26-C32)
Schäfer et al., 2016	L12		47.8	11.02	889	7.2	1175		0	0.03	Ah1										fir forest		Microwave, DCM:MeOH			2.55	31	25-33	30.4	∑Ci x i/ ∑Ci , i=27-33			12	(∑ odd C27-C33)/ (∑ even C26-C32)
Schäfer et al., 2016	L12		47.8	11.02	889	7.2	1175		0.03	0.1	Ah2										fir forest		Microwave, DCM:MeOH			2.65	31	25-35	30.8	∑Ci x i/ ∑Ci , i=27-33			4.3	(∑ odd C27-C33)/ (∑ even C26-C32)
Schäfer et al., 2016	L13		49.05	8.23	131	11	783					Litter									beeches, oaks, limes, sparse pines		Microwave, DCM:MeOH			35.77	27	25-33	27.3	∑Ci x i/ ∑Ci , i=27-33			23.8	(∑ odd C27-C33)/ (∑ even C26-C32)
Schäfer et al., 2016	L13		49.05	8.23	131	11	783		0	0.03	Ah1										beeches, oaks, limes, sparse pines		Microwave, DCM:MeOH			3.25	27	25-33	27.5	∑Ci x i/ ∑Ci , i=27-33			15	(∑ odd C27-C33)/ (∑ even C26-C32)
Schäfer et al., 2016	L13		49.05	8.23	131	11	783		0.03	0.1	Ah2										beeches, oaks, limes, sparse pines		Microwave, DCM:MeOH			0.35	27	25-31	28.1	∑Ci x i/ ∑Ci , i=27-33			3	(∑ odd C27-C33)/ (∑ even C26-C32)
Schäfer et al., 2016	L13		49.06	8.2	121	11	783		0	0.03	Ah1										glade, next to farmland and fruit trees (apple, plum)		Microwave, DCM:MeOH			1.29	31	25-35	30.4	∑Ci x i/ ∑Ci , i=27-33			5.3	(∑ odd C27-C33)/ (∑ even C26-C32)
Schäfer et al., 2016	L13		49.06	8.2	121	11	783		0.03	0.1	Ah2										glade, next to farmland and fruit trees (apple, plum)		Microwave, DCM:MeOH			0.82	31	25-33	30.2	∑Ci x i/ ∑Ci , i=27-33			3.9	(∑ odd C27-C33)/ (∑ even C26-C32)
Schäfer et al., 2016	L14		49.22	9.47	247	9.8	841					Litter									beech forest, sparse firs and oaks		Microwave, DCM:MeOH			63.32	27	25-33	27.2	∑Ci x i/ ∑Ci , i=27-33			32.8	(∑ odd C27-C33)/ (∑ even C26-C32)
Schäfer et al., 2016	L14		49.22	9.47	247	9.8	841		0	0.03	Ah1										beech forest, sparse firs and oaks		Microwave, DCM:MeOH			2.06	27	25-33	28.5	∑Ci x i/ ∑Ci , i=27-33			7.1	(∑ odd C27-C33)/ (∑ even C26-C32)
Schäfer et al., 2016	L14		49.22	9.47	247	9.8	841		0.03	0.1	Ah2										beech forest, sparse firs and oaks		Microwave, DCM:MeOH			0.65	27	25-33	29	∑Ci x i/ ∑Ci , i=27-33			4.4	(∑ odd C27-C33)/ (∑ even C26-C32)
Schäfer et al., 2016	L14		49.22	9.47	214	9.8	841		0	0.03	Ah1										grassland in the valley, next to beech forest		Microwave, DCM:MeOH			2.42	31	25-35	30.1	∑Ci x i/ ∑Ci , i=27-33			6.8	(∑ odd C27-C33)/ (∑ even C26-C32)
Schäfer et al., 2016	L14		49.22	9.47	214	9.8	841		0.03	0.1	Ah2										grassland in the valley, next to beech forest		Microwave, DCM:MeOH			1.7	31	25-35	30.1	∑Ci x i/ ∑Ci , i=27-33			6.6	(∑ odd C27-C33)/ (∑ even C26-C32)
Schäfer et al., 2016	L15		49.55	8.58	96	10.9	675					Litter									oak forest, sparse beeches, elms and pines		Microwave, DCM:MeOH			10.99	27	25-33	28.4	∑Ci x i/ ∑Ci , i=27-33			10.9	(∑ odd C27-C33)/ (∑ even C26-C32)
Schäfer et al., 2016	L15		49.55	8.58	96	10.9	675		0	0.03	Ah1										oak forest, sparse beeches, elms and pines		Microwave, DCM:MeOH			2.02	27	25-33	28.8	∑Ci x i/ ∑Ci , i=27-33			7.2	(∑ odd C27-C33)/ (∑ even C26-C32)
Schäfer et al., 2016	L15		49.55	8.58	96	10.9	675		0.03	0.1	Ah2										oak forest, sparse beeches, elms and pines		Microwave, DCM:MeOH			0.57	29	25-33	29.6	∑Ci x i/ ∑Ci , i=27-33			5.7	(∑ odd C27-C33)/ (∑ even C26-C32)
Schäfer et al., 2016	L16		50.56	10.35	421	7.7	661					Litter									beech forest, steep hillside		Microwave, DCM:MeOH			35.85	29	25-35	29.9	∑Ci x i/ ∑Ci , i=27-33			14.7	(∑ odd C27-C33)/ (∑ even C26-C32)
Schäfer et al., 2016	L16		50.56	10.35	421	7.7	661		0	0.03	Ah1										beech forest, steep hillside		Microwave, DCM:MeOH			8.27	31	25-35	30.3	∑Ci x i/ ∑Ci , i=27-33			7.8	(∑ odd C27-C33)/ (∑ even C26-C32)
Schäfer et al., 2016	L16		50.56	10.35	421	7.7	661		0.03	0.1	Ah2										beech forest, steep hillside		Microwave, DCM:MeOH			4.2	31	25-35	30.2	∑Ci x i/ ∑Ci , i=27-33			5.2	(∑ odd C27-C33)/ (∑ even C26-C32)
Schäfer et al., 2016	L16-1		50.56	10.36	450	7.7	661					Litter									sparse pine forest with grass layer		Microwave, DCM:MeOH			70.35	31	25-35	30.4	∑Ci x i/ ∑Ci , i=27-33			24.1	(∑ odd C27-C33)/ (∑ even C26-C32)
Schäfer et al., 2016	L16-1		50.56	10.36	450	7.7	661		0	0.03	Ah1										sparse pine forest with grass layer		Microwave, DCM:MeOH			5.09	31	25-35	30.2	∑Ci x i/ ∑Ci , i=27-33			6.9	(∑ odd C27-C33)/ (∑ even C26-C32)
Schäfer et al., 2016	L16-1		50.56	10.36	450	7.7	661		0.03	0.1	Ah2										sparse pine forest with grass layer		Microwave, DCM:MeOH			3.45	31	25-35	30.2	∑Ci x i/ ∑Ci , i=27-33			6	(∑ odd C27-C33)/ (∑ even C26-C32)
Schäfer et al., 2016	L16-2		50.56	10.36	487	7.7	661					Litter									sparse larch forest with grass layer		Microwave, DCM:MeOH			73.89	27	25-35	27.2	∑Ci x i/ ∑Ci , i=27-33			29.6	(∑ odd C27-C33)/ (∑ even C26-C32)
Schäfer et al., 2016	L16-2		50.56	10.36	487	7.7	661		0	0.03	Ah1										sparse larch forest with grass layer		Microwave, DCM:MeOH			5.03	27	25-35	29.6	∑Ci x i/ ∑Ci , i=27-33			5.9	(∑ odd C27-C33)/ (∑ even C26-C32)
Schäfer et al., 2016	L16-2		50.56	10.36	487	7.7	661		0.03	0.1	Ah2										sparse larch forest with grass layer		Microwave, DCM:MeOH			2.51	33	25-35	30.2	∑Ci x i/ ∑Ci , i=27-33			4.3	(∑ odd C27-C33)/ (∑ even C26-C32)
Schäfer et al., 2016	L17		50.82	7.17	78	10.3	839					Litter									beeches, acers, elms, oaks		Microwave, DCM:MeOH			79.06	27	25-35	27.8	∑Ci x i/ ∑Ci , i=27-33			14.6	(∑ odd C27-C33)/ (∑ even C26-C32)
Schäfer et al., 2016	L17		50.82	7.17	78	10.3	839		0	0.03	Ah1										beeches, acers, elms, oaks		Microwave, DCM:MeOH			10.48	27	25-35	28.6	∑Ci x i/ ∑Ci , i=27-33			10.3	(∑ odd C27-C33)/ (∑ even C26-C32)
Schäfer et al., 2016	L17		50.82	7.17	78	10.3	839		0.03	0.1	Ah2										beeches, acers, elms, oaks		Microwave, DCM:MeOH			5.14	27	25-35	29.6	∑Ci x i/ ∑Ci , i=27-33			6.8	(∑ odd C27-C33)/ (∑ even C26-C32)
Schäfer et al., 2016	L17		50.83	7.18	107	10.3	839		0	0.03	Ah1										heath		Microwave, DCM:MeOH			1.33	31	25-35	30.6	∑Ci x i/ ∑Ci , i=27-33			5	(∑ odd C27-C33)/ (∑ even C26-C32)
Schäfer et al., 2016	L17		50.83	7.18	107	10.3	839		0.03	0.1	Ah2										heath		Microwave, DCM:MeOH			0.95	31	25-35	30.5	∑Ci x i/ ∑Ci , i=27-33			3.5	(∑ odd C27-C33)/ (∑ even C26-C32)
Schäfer et al., 2016	L18		51.18	8.5	753	5.5	1417					Litter									luxuriant spruce forest		Microwave, DCM:MeOH			14.85	29	25-33	29.5	∑Ci x i/ ∑Ci , i=27-33			4.7	(∑ odd C27-C33)/ (∑ even C26-C32)
Schäfer et al., 2016	L18		51.18	8.5	753	5.5	1417		0	0.03	Ah1										luxuriant spruce forest		Microwave, DCM:MeOH			22.43	31	25-35	29.8	∑Ci x i/ ∑Ci , i=27-33			8.3	(∑ odd C27-C33)/ (∑ even C26-C32)
Schäfer et al., 2016	L18		51.18	8.5	753	5.5	1417		0.03	0.1	Ah2										luxuriant spruce forest		Microwave, DCM:MeOH			15.1	31	25-35	29.9	∑Ci x i/ ∑Ci , i=27-33			8.1	(∑ odd C27-C33)/ (∑ even C26-C32)
Schäfer et al., 2016	L18		51.18	8.5	720	5.5	1417					Litter									young beech forest at hillside, close to spruce stand		Microwave, DCM:MeOH			88.75	27	25-35	27.5	∑Ci x i/ ∑Ci , i=27-33			20.2	(∑ odd C27-C33)/ (∑ even C26-C32)
Schäfer et al., 2016	L18		51.18	8.5	720	5.5	1417		0	0.03	Ah1										young beech forest at hillside, close to spruce stand		Microwave, DCM:MeOH			6.94	27	25-33	27.9	∑Ci x i/ ∑Ci , i=27-33			15.2	(∑ odd C27-C33)/ (∑ even C26-C32)
Schäfer et al., 2016	L18		51.18	8.5	720	5.5	1417		0.03	0.1	Ah2										young beech forest at hillside, close to spruce stand		Microwave, DCM:MeOH			4.65	27	25-35	28.2	∑Ci x i/ ∑Ci , i=27-33			10.9	(∑ odd C27-C33)/ (∑ even C26-C32)
Schäfer et al., 2016	L18		51.18	8.49	829	5.5	1417		0	0.03	Ah1										heath, small shrubs, close to spruce stand, initially cleared		Microwave, DCM:MeOH			16.98	31	25-35	30.5	∑Ci x i/ ∑Ci , i=27-33			9.9	(∑ odd C27-C33)/ (∑ even C26-C32)
Schäfer et al., 2016	L18		51.18	8.49	829	5.5	1417		0.03	0.1	Ah2										heath, small shrubs, close to spruce stand, initially cleared		Microwave, DCM:MeOH			9.19	31	25-35	30.6	∑Ci x i/ ∑Ci , i=27-33			9	(∑ odd C27-C33)/ (∑ even C26-C32)
Schäfer et al., 2016	L19		52.52	9.68	48	9.6	661					Litter									birch forest with small oaks, sparse poplars, surrounded by farmland		Microwave, DCM:MeOH			413.83	27	25-33	28.9	∑Ci x i/ ∑Ci , i=27-33			17.4	(∑ odd C27-C33)/ (∑ even C26-C32)
Schäfer et al., 2016	L19		52.52	9.68	48	9.6	661		0	0.03	Ah1										birch forest with small oaks, sparse poplars, surrounded by farmland		Microwave, DCM:MeOH			28.53	31	25-35	29.7	∑Ci x i/ ∑Ci , i=27-33			13	(∑ odd C27-C33)/ (∑ even C26-C32)
Schäfer et al., 2016	L19		52.52	9.68	48	9.6	661		0.03	0.1	Ah2										birch forest with small oaks, sparse poplars, surrounded by farmland		Microwave, DCM:MeOH			3.05	33	25-33	31.2	∑Ci x i/ ∑Ci , i=27-33			7.1	(∑ odd C27-C33)/ (∑ even C26-C32)
Schäfer et al., 2016	L19		52.52	9.68	52	9.6	661		0	0.03	Ah1										next to farm track		Microwave, DCM:MeOH			4.49	31	25-35	30.4	∑Ci x i/ ∑Ci , i=27-33			10.1	(∑ odd C27-C33)/ (∑ even C26-C32)
Schäfer et al., 2016	L19		52.52	9.68	52	9.6	661		0.03	0.1	Ah2										next to farm track		Microwave, DCM:MeOH			1.9	31	25-35	30.1	∑Ci x i/ ∑Ci , i=27-33			6.5	(∑ odd C27-C33)/ (∑ even C26-C32)
Schäfer et al., 2016	L20		52.99	8.72	31	9.4	696					Litter									beech-oak-forest		Microwave, DCM:MeOH			81.74	27	25-33	27.6	∑Ci x i/ ∑Ci , i=27-33			17.5	(∑ odd C27-C33)/ (∑ even C26-C32)
Schäfer et al., 2016	L20		52.99	8.72	31	9.4	696		0	0.03	Ah1										beech-oak-forest		Microwave, DCM:MeOH			20.78	27	25-33	27.8	∑Ci x i/ ∑Ci , i=27-33			14.5	(∑ odd C27-C33)/ (∑ even C26-C32)
Schäfer et al., 2016	L20		52.99	8.72	31	9.4	696		0.03	0.1	Ah2										beech-oak-forest		Microwave, DCM:MeOH			4.82	27	25-35	29.1	∑Ci x i/ ∑Ci , i=27-33			6.8	(∑ odd C27-C33)/ (∑ even C26-C32)
Schäfer et al., 2016	L21		54.44	9.6	30	8.6	885					Litter									spruce forest with larches		Microwave, DCM:MeOH			30.93	29	25-35	28.6	∑Ci x i/ ∑Ci , i=27-33			13.1	(∑ odd C27-C33)/ (∑ even C26-C32)
Schäfer et al., 2016	L21		54.44	9.6	30	8.6	885		0	0.03	Ah1										spruce forest with larches		Microwave, DCM:MeOH			5.3	29	25-35	29.4	∑Ci x i/ ∑Ci , i=27-33			7.9	(∑ odd C27-C33)/ (∑ even C26-C32)
Schäfer et al., 2016	L21		54.44	9.6	30	8.6	885		0.03	0.1	Ah2										spruce forest with larches		Microwave, DCM:MeOH			2.88	29	25-35	29.2	∑Ci x i/ ∑Ci , i=27-33			10	(∑ odd C27-C33)/ (∑ even C26-C32)
Schäfer et al., 2016	L21		54.44	9.6	23	8.6	885		0	0.03	Ah1										cow pasture, sparse oaks		Microwave, DCM:MeOH			4.98	31	25-34	30.7	∑Ci x i/ ∑Ci , i=27-33			7.6	(∑ odd C27-C33)/ (∑ even C26-C32)
Schäfer et al., 2016	L21		54.44	9.6	23	8.6	885		0.03	0.1	Ah2										cow pasture, sparse oaks		Microwave, DCM:MeOH			4.46	31	25-34	30.9	∑Ci x i/ ∑Ci , i=27-33			8.4	(∑ odd C27-C33)/ (∑ even C26-C32)
Schäfer et al., 2016	L22		55.37	10.51	16	8	595					Litter									acer forest with poplars, ashes and elder		Microwave, DCM:MeOH			58.1	31	25-35	30.6	∑Ci x i/ ∑Ci , i=27-33			15	(∑ odd C27-C33)/ (∑ even C26-C32)
Schäfer et al., 2016	L22		55.37	10.51	16	8	595		0	0.03	Ah1										acer forest with poplars, ashes and elder		Microwave, DCM:MeOH			36.71	31	25-35	29.8	∑Ci x i/ ∑Ci , i=27-33			9.5	(∑ odd C27-C33)/ (∑ even C26-C32)
Schäfer et al., 2016	L22		55.37	10.51	16	8	595		0.03	0.1	Ah2										acer forest with poplars, ashes and elder		Microwave, DCM:MeOH			21.13	31	25-35	29.6	∑Ci x i/ ∑Ci , i=27-33			8.7	(∑ odd C27-C33)/ (∑ even C26-C32)
Schäfer et al., 2016	L23		56.03	12.06	20	8.1	606					Litter									fir forest with swampy underground		Microwave, DCM:MeOH			10.93	29	25-35	29.7	∑Ci x i/ ∑Ci , i=27-33			4.4	(∑ odd C27-C33)/ (∑ even C26-C32)
Schäfer et al., 2016	L23		56.03	12.06	20	8.1	606		0	0.03	Ah1										fir forest with swampy underground		Microwave, DCM:MeOH			8.17	31	25-35	30.3	∑Ci x i/ ∑Ci , i=27-33			7.4	(∑ odd C27-C33)/ (∑ even C26-C32)
Schäfer et al., 2016	L23		56.03	12.06	20	8.1	606		0.03	0.1	Ah2										fir forest with swampy underground		Microwave, DCM:MeOH			5.25	31	25-35	31.1	∑Ci x i/ ∑Ci , i=27-33			11.2	(∑ odd C27-C33)/ (∑ even C26-C32)
Schäfer et al., 2016	L23		56.03	12.05	30	8.1	606					Litter									beech forest with sparse acers, birches, loamy underground		Microwave, DCM:MeOH			133.86	27	25-35	27.3	∑Ci x i/ ∑Ci , i=27-33			30.3	(∑ odd C27-C33)/ (∑ even C26-C32)
Schäfer et al., 2016	L23		56.03	12.05	30	8.1	606		0	0.03	Ah1										beech forest with sparse acers, birches, loamy underground		Microwave, DCM:MeOH			21.72	27	25-35	27.6	∑Ci x i/ ∑Ci , i=27-33			19.9	(∑ odd C27-C33)/ (∑ even C26-C32)
Schäfer et al., 2016	L23		56.03	12.05	30	8.1	606		0.03	0.1	Ah2										beech forest with sparse acers, birches, loamy underground		Microwave, DCM:MeOH			2.81	27	25-33	28.7	∑Ci x i/ ∑Ci , i=27-33			10.7	(∑ odd C27-C33)/ (∑ even C26-C32)
Schäfer et al., 2016	L24		57.61	14.21	208	5.3	641					Litter									spruce-pine-forest with moss layer		Microwave, DCM:MeOH			71.65	27	25-33	28.6	∑Ci x i/ ∑Ci , i=27-33			15.8	(∑ odd C27-C33)/ (∑ even C26-C32)
Schäfer et al., 2016	L24		57.61	14.21	208	5.3	641		0	0.03	Ah1										spruce-pine-forest with moss layer		Microwave, DCM:MeOH			19.66	31	25-35	29.8	∑Ci x i/ ∑Ci , i=27-33			9.7	(∑ odd C27-C33)/ (∑ even C26-C32)
Schäfer et al., 2016	L24		57.61	14.21	208	5.3	641		0.03	0.1	Ah2										spruce-pine-forest with moss layer		Microwave, DCM:MeOH			3.51	31	25-35	30.3	∑Ci x i/ ∑Ci , i=27-33			7.7	(∑ odd C27-C33)/ (∑ even C26-C32)
Schäfer et al., 2016	L25		58.53	15.04	90	6.8	533					Litter									oak forest, sparse birches and larches		Microwave, DCM:MeOH			134.24	27	25-35	27.4	∑Ci x i/ ∑Ci , i=27-33			16.2	(∑ odd C27-C33)/ (∑ even C26-C32)
Schäfer et al., 2016	L25		58.53	15.04	90	6.8	533		0	0.03	Ah1										oak forest, sparse birches and larches		Microwave, DCM:MeOH			2.7	27	25-33	28.4	∑Ci x i/ ∑Ci , i=27-33			11.2	(∑ odd C27-C33)/ (∑ even C26-C32)
Schäfer et al., 2016	L25		58.53	15.04	90	6.8	533		0.03	0.1	Ah2										oak forest, sparse birches and larches		Microwave, DCM:MeOH			1.32	31	25-33	29.7	∑Ci x i/ ∑Ci , i=27-33			7	(∑ odd C27-C33)/ (∑ even C26-C32)
Schäfer et al., 2016	L26		58.85	14.91	110	5.4	635					Litter									spruce forest, sparse birches, used as cattle run		Microwave, DCM:MeOH			284.17	27	25-35	29.2	∑Ci x i/ ∑Ci , i=27-33			15.2	(∑ odd C27-C33)/ (∑ even C26-C32)
Schäfer et al., 2016	L26		58.85	14.91	110	5.4	635		0	0.03	Ah1										spruce forest, sparse birches, used as cattle run		Microwave, DCM:MeOH			15.36	31	25-35	30.1	∑Ci x i/ ∑Ci , i=27-33			11.6	(∑ odd C27-C33)/ (∑ even C26-C32)
Schäfer et al., 2016	L26		58.85	14.91	110	5.4	635		0.03	0.1	Ah2										spruce forest, sparse birches, used as cattle run		Microwave, DCM:MeOH			3.87	31	25-35	30.1	∑Ci x i/ ∑Ci , i=27-33			8.8	(∑ odd C27-C33)/ (∑ even C26-C32)
Schäfer et al., 2016	L26-1		58.87	14.9	104	5.4	635					Litter									acers, oaks, beeches, sparse firs, on partly pebbly, partly humus-rich floor		Microwave, DCM:MeOH			280.2	31	25-35	30.2	∑Ci x i/ ∑Ci , i=27-33			11.2	(∑ odd C27-C33)/ (∑ even C26-C32)
Schäfer et al., 2016	L26-1		58.87	14.9	104	5.4	635		0	0.03	Ah1										acers, oaks, beeches, sparse firs, on partly pebbly, partly humus-rich floor		Microwave, DCM:MeOH			27.98	31	25-35	29.8	∑Ci x i/ ∑Ci , i=27-33			14	(∑ odd C27-C33)/ (∑ even C26-C32)
Schäfer et al., 2016	L26-1		58.87	14.9	104	5.4	635		0.03	0.1	Ah2										acers, oaks, beeches, sparse firs, on partly pebbly, partly humus-rich floor		Microwave, DCM:MeOH			18.07	31	25-35	29.7	∑Ci x i/ ∑Ci , i=27-33			12.7	(∑ odd C27-C33)/ (∑ even C26-C32)
Schäfer et al., 2016	L26-2		58.85	14.91	104	5.4	635					Litter									birch- and oak-belt at spruce forest edge, grass layer, also used as cattle run		Microwave, DCM:MeOH			1468.14	31	25-35	29.5	∑Ci x i/ ∑Ci , i=27-33			19.3	(∑ odd C27-C33)/ (∑ even C26-C32)
Schäfer et al., 2016	L26-2		58.85	14.91	104	5.4	635		0	0.03	Ah1										birch- and oak-belt at spruce forest edge, grass layer, also used as cattle run		Microwave, DCM:MeOH			15.13	31	25-35	29.8	∑Ci x i/ ∑Ci , i=27-33			13.3	(∑ odd C27-C33)/ (∑ even C26-C32)
Schäfer et al., 2016	L26-2		58.85	14.91	104	5.4	635		0.03	0.1	Ah2										birch- and oak-belt at spruce forest edge, grass layer, also used as cattle run		Microwave, DCM:MeOH			6.47	31	25-35	30	∑Ci x i/ ∑Ci , i=27-33			10.5	(∑ odd C27-C33)/ (∑ even C26-C32)
Stout, 2020	LF4	Missouri	37.75	-92.1	342	12.5	1071	July				Fresh_leaves										hickory	Shaker, DCM			71.9	29	25-34	29.2	∑Ci x i/ ∑Ci , i=27-33			13.1	(∑ odd C27-C33)/ (∑ even C26-C32)
Stout, 2020	LF9	Missouri	37.75	-92.1	342	12.5	1071	July				Fresh_leaves										hickory	Shaker, DCM			52.8	29	25-35	29.1	∑Ci x i/ ∑Ci , i=27-33			11.7	(∑ odd C27-C33)/ (∑ even C26-C32)
Stout, 2020	LF13	Missouri	37.75	-92.1	342	12.5	1071	July				Fresh_leaves										hickory	Shaker, DCM			76.4	29	25-35	29.5	∑Ci x i/ ∑Ci , i=27-33			18	(∑ odd C27-C33)/ (∑ even C26-C32)
Stout, 2020	LF14	Missouri	37.75	-92.1	342	12.5	1071	July				Fresh_leaves										hickory	Shaker, DCM			89.4	29	25-34	29.3	∑Ci x i/ ∑Ci , i=27-33			19.2	(∑ odd C27-C33)/ (∑ even C26-C32)
Stout, 2020	LF18	Missouri	37.75	-92.1	342	12.5	1071	July				Fresh_leaves										hickory	Shaker, DCM			73.2	29	25-35	29	∑Ci x i/ ∑Ci , i=27-33			12	(∑ odd C27-C33)/ (∑ even C26-C32)
Stout, 2020	LF19	Missouri	37.75	-92.1	342	12.5	1071	July				Fresh_leaves										hickory	Shaker, DCM			84.3	29	25-34	28.7	∑Ci x i/ ∑Ci , i=27-33			16.1	(∑ odd C27-C33)/ (∑ even C26-C32)
Stout, 2020	LF20	Missouri	37.75	-92.1	342	12.5	1071	July				Fresh_leaves										hickory	Shaker, DCM			89.5	27	25-35	29.1	∑Ci x i/ ∑Ci , i=27-33			13.2	(∑ odd C27-C33)/ (∑ even C26-C32)
Stout, 2020	LF30	Missouri	37.75	-92.1	342	12.5	1071	July				Fresh_leaves										hickory	Shaker, DCM			87.2	29	25-34	29.3	∑Ci x i/ ∑Ci , i=27-33			14	(∑ odd C27-C33)/ (∑ even C26-C32)
Stout, 2020	LF35	Missouri	37.75	-92.1	342	12.5	1071	July				Fresh_leaves										hickory	Shaker, DCM			85	29	25-35	29.1	∑Ci x i/ ∑Ci , i=27-33			20.4	(∑ odd C27-C33)/ (∑ even C26-C32)
Stout, 2020	LF39	Missouri	37.75	-92.1	342	12.5	1071	July				Fresh_leaves										hickory	Shaker, DCM			91	29	25-35	29.5	∑Ci x i/ ∑Ci , i=27-33			25.3	(∑ odd C27-C33)/ (∑ even C26-C32)
Stout, 2020	LF43	Missouri	37.75	-92.1	342	12.5	1071	July				Fresh_leaves										hickory	Shaker, DCM			53.7	29	25-35	29.3	∑Ci x i/ ∑Ci , i=27-33			13.7	(∑ odd C27-C33)/ (∑ even C26-C32)
Stout, 2020	LF2	Missouri	37.75	-92.1	342	12.5	1071	July				Fresh_leaves										maple	Shaker, DCM			51.5	29	25-34	29.6	∑Ci x i/ ∑Ci , i=27-33			15.3	(∑ odd C27-C33)/ (∑ even C26-C32)
Stout, 2020	LF7	Missouri	37.75	-92.1	342	12.5	1071	July				Fresh_leaves										maple	Shaker, DCM			90.3	29	25-35	29	∑Ci x i/ ∑Ci , i=27-33			10	(∑ odd C27-C33)/ (∑ even C26-C32)
Stout, 2020	LF10	Missouri	37.75	-92.1	342	12.5	1071	July				Fresh_leaves										maple	Shaker, DCM			55	29	25-35	29	∑Ci x i/ ∑Ci , i=27-33			10	(∑ odd C27-C33)/ (∑ even C26-C32)
Stout, 2020	LF21	Missouri	37.75	-92.1	342	12.5	1071	July				Fresh_leaves										maple	Shaker, DCM			74.4	27	25-35	29	∑Ci x i/ ∑Ci , i=27-33			14.3	(∑ odd C27-C33)/ (∑ even C26-C32)
Stout, 2020	LF22	Missouri	37.75	-92.1	342	12.5	1071	July				Fresh_leaves										maple	Shaker, DCM			62.8	29	25-34	29.4	∑Ci x i/ ∑Ci , i=27-33			17.1	(∑ odd C27-C33)/ (∑ even C26-C32)
Stout, 2020	LF25	Missouri	37.75	-92.1	342	12.5	1071	July				Fresh_leaves										maple	Shaker, DCM			94.3	29	25-35	29.1	∑Ci x i/ ∑Ci , i=27-33			10.3	(∑ odd C27-C33)/ (∑ even C26-C32)
Stout, 2020	LF26	Missouri	37.75	-92.1	342	12.5	1071	July				Fresh_leaves										maple	Shaker, DCM			90.7	29	25-34	29.2	∑Ci x i/ ∑Ci , i=27-33			21.2	(∑ odd C27-C33)/ (∑ even C26-C32)
Stout, 2020	LF28	Missouri	37.75	-92.1	342	12.5	1071	July				Fresh_leaves										maple	Shaker, DCM			90.7	29	25-35	29.2	∑Ci x i/ ∑Ci , i=27-33			22.2	(∑ odd C27-C33)/ (∑ even C26-C32)
Stout, 2020	LF32	Missouri	37.75	-92.1	342	12.5	1071	July				Fresh_leaves										maple	Shaker, DCM			89.4	29	25-35	29.6	∑Ci x i/ ∑Ci , i=27-33			13.7	(∑ odd C27-C33)/ (∑ even C26-C32)
Stout, 2020	LF33	Missouri	37.75	-92.1	342	12.5	1071	July				Fresh_leaves										maple	Shaker, DCM			77.1	31	25-35	29.6	∑Ci x i/ ∑Ci , i=27-33			16.2	(∑ odd C27-C33)/ (∑ even C26-C32)
Stout, 2020	LF40	Missouri	37.75	-92.1	342	12.5	1071	July				Fresh_leaves										maple	Shaker, DCM			83.2	27	25-35	29.2	∑Ci x i/ ∑Ci , i=27-33			15.2	(∑ odd C27-C33)/ (∑ even C26-C32)
Stout, 2020	LF42	Missouri	37.75	-92.1	342	12.5	1071	July				Fresh_leaves										maple	Shaker, DCM			52.2	29	25-35	29	∑Ci x i/ ∑Ci , i=27-33			16.5	(∑ odd C27-C33)/ (∑ even C26-C32)
Stout, 2020	LF1	Missouri	37.75	-92.1	342	12.5	1071	July				Fresh_leaves										oak	Shaker, DCM			76.9	31	25-33	30.5	∑Ci x i/ ∑Ci , i=27-33			20.3	(∑ odd C27-C33)/ (∑ even C26-C32)
Stout, 2020	LF3	Missouri	37.75	-92.1	342	12.5	1071	July				Fresh_leaves										oak	Shaker, DCM			88.4	27	25-35	29.1	∑Ci x i/ ∑Ci , i=27-33			15.4	(∑ odd C27-C33)/ (∑ even C26-C32)
Stout, 2020	LF5	Missouri	37.75	-92.1	342	12.5	1071	July				Fresh_leaves										oak	Shaker, DCM			89.3	29	25-33	29.3	∑Ci x i/ ∑Ci , i=27-33			22.1	(∑ odd C27-C33)/ (∑ even C26-C32)
Stout, 2020	LF6	Missouri	37.75	-92.1	342	12.5	1071	July				Fresh_leaves										oak	Shaker, DCM			85.5	29	25-34	29.2	∑Ci x i/ ∑Ci , i=27-33			14.4	(∑ odd C27-C33)/ (∑ even C26-C32)
Stout, 2020	LF8	Missouri	37.75	-92.1	342	12.5	1071	July				Fresh_leaves										oak	Shaker, DCM			77.4	29	25-35	29.1	∑Ci x i/ ∑Ci , i=27-33			19.2	(∑ odd C27-C33)/ (∑ even C26-C32)
Stout, 2020	LF11	Missouri	37.75	-92.1	342	12.5	1071	July				Fresh_leaves										oak	Shaker, DCM			70.1	29	25-35	28.9	∑Ci x i/ ∑Ci , i=27-33			12.7	(∑ odd C27-C33)/ (∑ even C26-C32)
Stout, 2020	LF12	Missouri	37.75	-92.1	342	12.5	1071	July				Fresh_leaves										oak	Shaker, DCM			89.4	29	25-35	29.2	∑Ci x i/ ∑Ci , i=27-33			19	(∑ odd C27-C33)/ (∑ even C26-C32)
Stout, 2020	LF15	Missouri	37.75	-92.1	342	12.5	1071	July				Fresh_leaves										oak	Shaker, DCM			87.9	29	25-35	28.9	∑Ci x i/ ∑Ci , i=27-33			15.9	(∑ odd C27-C33)/ (∑ even C26-C32)
Stout, 2020	LF16	Missouri	37.75	-92.1	342	12.5	1071	July				Fresh_leaves										oak	Shaker, DCM			85.7	29	25-34	29.5	∑Ci x i/ ∑Ci , i=27-33			13.3	(∑ odd C27-C33)/ (∑ even C26-C32)
Stout, 2020	LF17	Missouri	37.75	-92.1	342	12.5	1071	July				Fresh_leaves										oak	Shaker, DCM			62.3	27	25-35	29.1	∑Ci x i/ ∑Ci , i=27-33			16.4	(∑ odd C27-C33)/ (∑ even C26-C32)
Stout, 2020	LF23	Missouri	37.75	-92.1	342	12.5	1071	July				Fresh_leaves										oak	Shaker, DCM			66	29	25-35	29.8	∑Ci x i/ ∑Ci , i=27-33			21.4	(∑ odd C27-C33)/ (∑ even C26-C32)
Stout, 2020	LF24	Missouri	37.75	-92.1	342	12.5	1071	July				Fresh_leaves										oak	Shaker, DCM			79	29	25-34	29.3	∑Ci x i/ ∑Ci , i=27-33			20.2	(∑ odd C27-C33)/ (∑ even C26-C32)
Stout, 2020	LF27	Missouri	37.75	-92.1	342	12.5	1071	July				Fresh_leaves										oak	Shaker, DCM			87.5	31	25-35	29.8	∑Ci x i/ ∑Ci , i=27-33			10.5	(∑ odd C27-C33)/ (∑ even C26-C32)
Stout, 2020	LF29	Missouri	37.75	-92.1	342	12.5	1071	July				Fresh_leaves										oak	Shaker, DCM			61	29	25-35	29.2	∑Ci x i/ ∑Ci , i=27-33			10.2	(∑ odd C27-C33)/ (∑ even C26-C32)
Stout, 2020	LF31	Missouri	37.75	-92.1	342	12.5	1071	July				Fresh_leaves										oak	Shaker, DCM			83.4	29	25-35	29.1	∑Ci x i/ ∑Ci , i=27-33			15.6	(∑ odd C27-C33)/ (∑ even C26-C32)
Stout, 2020	LF34	Missouri	37.75	-92.1	342	12.5	1071	July				Fresh_leaves										oak	Shaker, DCM			85.6	31	25-35	29.9	∑Ci x i/ ∑Ci , i=27-33			18.5	(∑ odd C27-C33)/ (∑ even C26-C32)
Stout, 2020	LF36	Missouri	37.75	-92.1	342	12.5	1071	July				Fresh_leaves										oak	Shaker, DCM			93.7	29	25-35	29.4	∑Ci x i/ ∑Ci , i=27-33			14.2	(∑ odd C27-C33)/ (∑ even C26-C32)
Stout, 2020	LF37	Missouri	37.75	-92.1	342	12.5	1071	July				Fresh_leaves										oak	Shaker, DCM			53.5	29	25-35	29.1	∑Ci x i/ ∑Ci , i=27-33			13.5	(∑ odd C27-C33)/ (∑ even C26-C32)
Stout, 2020	LF38	Missouri	37.75	-92.1	342	12.5	1071	July				Fresh_leaves										oak	Shaker, DCM			56.5	29	25-35	29.6	∑Ci x i/ ∑Ci , i=27-33			15.1	(∑ odd C27-C33)/ (∑ even C26-C32)
Stout, 2020	LF41	Missouri	37.75	-92.1	342	12.5	1071	July				Fresh_leaves										oak	Shaker, DCM			87.6	29	25-35	29.8	∑Ci x i/ ∑Ci , i=27-33			21	(∑ odd C27-C33)/ (∑ even C26-C32)
Stout, 2020	LT1	Missouri	37.75	-92.1	342	12.5	1071	July				Litter											Shaker, DCM			73	29	25-35	29.2	∑Ci x i/ ∑Ci , i=27-33			12.4	(∑ odd C27-C33)/ (∑ even C26-C32)
Stout, 2020	LT2	Missouri	37.75	-92.1	342	12.5	1071	July				Litter											Shaker, DCM			68.1	29	25-35	29.5	∑Ci x i/ ∑Ci , i=27-33			13.2	(∑ odd C27-C33)/ (∑ even C26-C32)
Stout, 2020	LT3	Missouri	37.75	-92.1	342	12.5	1071	July				Litter											Shaker, DCM			52	31	25-35	29.7	∑Ci x i/ ∑Ci , i=27-33			14	(∑ odd C27-C33)/ (∑ even C26-C32)
Stout, 2020	LT4	Missouri	37.75	-92.1	342	12.5	1071	July				Litter											Shaker, DCM			82.6	29	25-35	29.3	∑Ci x i/ ∑Ci , i=27-33			13	(∑ odd C27-C33)/ (∑ even C26-C32)
Stout, 2020	LT5	Missouri	37.75	-92.1	342	12.5	1071	July				Litter											Shaker, DCM			64	29	25-35	29.6	∑Ci x i/ ∑Ci , i=27-33			22.6	(∑ odd C27-C33)/ (∑ even C26-C32)
Stout, 2020	LT6	Missouri	37.75	-92.1	342	12.5	1071	July				Litter											Shaker, DCM			73.8	29	25-33	29.4	∑Ci x i/ ∑Ci , i=27-33			23.1	(∑ odd C27-C33)/ (∑ even C26-C32)
Stout, 2020	LT7	Missouri	37.75	-92.1	342	12.5	1071	July				Litter											Shaker, DCM			71.4	29	25-35	29.6	∑Ci x i/ ∑Ci , i=27-33			14.1	(∑ odd C27-C33)/ (∑ even C26-C32)
Stout, 2020	LT8	Missouri	37.75	-92.1	342	12.5	1071	July				Litter											Shaker, DCM			80.4	29	25-34	29.2	∑Ci x i/ ∑Ci , i=27-33			9.3	(∑ odd C27-C33)/ (∑ even C26-C32)
Stout, 2020	LT9	Missouri	37.75	-92.1	342	12.5	1071	July				Litter											Shaker, DCM			67.9	29	25-35	29.5	∑Ci x i/ ∑Ci , i=27-33			15.4	(∑ odd C27-C33)/ (∑ even C26-C32)
Stout, 2020	LT10	Missouri	37.75	-92.1	342	12.5	1071	July				Litter											Shaker, DCM			75.3	29	25-35	29.3	∑Ci x i/ ∑Ci , i=27-33			9	(∑ odd C27-C33)/ (∑ even C26-C32)
Stout, 2020	LT11	Missouri	37.75	-92.1	342	12.5	1071	July				Litter											Shaker, DCM			77.5	29	25-35	29.4	∑Ci x i/ ∑Ci , i=27-33			14.8	(∑ odd C27-C33)/ (∑ even C26-C32)
Stout, 2020	LT12	Missouri	37.75	-92.1	342	12.5	1071	July				Litter											Shaker, DCM			47.6	27	25-35	29.6	∑Ci x i/ ∑Ci , i=27-33			9.8	(∑ odd C27-C33)/ (∑ even C26-C32)
Stout, 2020	LT13	Missouri	37.75	-92.1	342	12.5	1071	July				Litter											Shaker, DCM			62.5	29	25-34	29.4	∑Ci x i/ ∑Ci , i=27-33			12.8	(∑ odd C27-C33)/ (∑ even C26-C32)
Stout, 2020	LT14	Missouri	37.75	-92.1	342	12.5	1071	July				Litter											Shaker, DCM			69.9	29	25-34	29.5	∑Ci x i/ ∑Ci , i=27-33			9.4	(∑ odd C27-C33)/ (∑ even C26-C32)
Stout, 2020	LT15	Missouri	37.75	-92.1	342	12.5	1071	July				Litter											Shaker, DCM			62.3	27	25-34	29	∑Ci x i/ ∑Ci , i=27-33			10.3	(∑ odd C27-C33)/ (∑ even C26-C32)
Stout, 2020	LT16	Missouri	37.75	-92.1	342	12.5	1071	July				Litter											Shaker, DCM			50	29	25-35	29.1	∑Ci x i/ ∑Ci , i=27-33			10.1	(∑ odd C27-C33)/ (∑ even C26-C32)
Stout, 2020	LT17	Missouri	37.75	-92.1	342	12.5	1071	July				Litter											Shaker, DCM			74.7	29	25-34	29.3	∑Ci x i/ ∑Ci , i=27-33			14.6	(∑ odd C27-C33)/ (∑ even C26-C32)
Stout, 2020	LT18	Missouri	37.75	-92.1	342	12.5	1071	July				Litter											Shaker, DCM			76.1	29	25-35	29.7	∑Ci x i/ ∑Ci , i=27-33			10.7	(∑ odd C27-C33)/ (∑ even C26-C32)
Stout, 2020	LT19	Missouri	37.75	-92.1	342	12.5	1071	July				Litter											Shaker, DCM			66.7	29	25-35	29.2	∑Ci x i/ ∑Ci , i=27-33			12.4	(∑ odd C27-C33)/ (∑ even C26-C32)
Stout, 2020	LT20	Missouri	37.75	-92.1	342	12.5	1071	July				Litter											Shaker, DCM			75.8	31	25-34	29.7	∑Ci x i/ ∑Ci , i=27-33			15.5	(∑ odd C27-C33)/ (∑ even C26-C32)
Stout, 2020	LT21	Missouri	37.75	-92.1	342	12.5	1071	July				Litter											Shaker, DCM			88.3	29	25-35	29.7	∑Ci x i/ ∑Ci , i=27-33			18.6	(∑ odd C27-C33)/ (∑ even C26-C32)
Stout, 2020	LT22	Missouri	37.75	-92.1	342	12.5	1071	July				Litter											Shaker, DCM			75.9	27	25-35	29.3	∑Ci x i/ ∑Ci , i=27-33			10.7	(∑ odd C27-C33)/ (∑ even C26-C32)
Stout, 2020	LT23	Missouri	37.75	-92.1	342	12.5	1071	July				Litter											Shaker, DCM			69.2	29	25-35	29.6	∑Ci x i/ ∑Ci , i=27-33			22.1	(∑ odd C27-C33)/ (∑ even C26-C32)
Stout, 2020	LT24	Missouri	37.75	-92.1	342	12.5	1071	July				Litter											Shaker, DCM			80.7	27	25-34	29.6	∑Ci x i/ ∑Ci , i=27-33			12	(∑ odd C27-C33)/ (∑ even C26-C32)
Stout, 2020	LT25	Missouri	37.75	-92.1	342	12.5	1071	July				Litter											Shaker, DCM			66.1	31	25-34	29.8	∑Ci x i/ ∑Ci , i=27-33			12.8	(∑ odd C27-C33)/ (∑ even C26-C32)
Stout, 2020	LT26	Missouri	37.75	-92.1	342	12.5	1071	July				Litter											Shaker, DCM			64.5	29	25-34	29.4	∑Ci x i/ ∑Ci , i=27-33			11.4	(∑ odd C27-C33)/ (∑ even C26-C32)
Stout, 2020	LT27	Missouri	37.75	-92.1	342	12.5	1071	July				Litter											Shaker, DCM			48.8	29	25-35	29.5	∑Ci x i/ ∑Ci , i=27-33			15.8	(∑ odd C27-C33)/ (∑ even C26-C32)
Stout, 2020	LT28	Missouri	37.75	-92.1	342	12.5	1071	July				Litter											Shaker, DCM			67.2	29	25-34	29.4	∑Ci x i/ ∑Ci , i=27-33			14.9	(∑ odd C27-C33)/ (∑ even C26-C32)
Stout, 2020	LT29	Missouri	37.75	-92.1	342	12.5	1071	July				Litter											Shaker, DCM			79.9	27	25-35	29.3	∑Ci x i/ ∑Ci , i=27-33			7.9	(∑ odd C27-C33)/ (∑ even C26-C32)
Stout, 2020	LT30	Missouri	37.75	-92.1	342	12.5	1071	July				Litter											Shaker, DCM			72.7	29	25-34	29.4	∑Ci x i/ ∑Ci , i=27-33			14	(∑ odd C27-C33)/ (∑ even C26-C32)
Stout, 2020	LT31	Missouri	37.75	-92.1	342	12.5	1071	July				Litter											Shaker, DCM			48.8	27	25-35	29.1	∑Ci x i/ ∑Ci , i=27-33			9.3	(∑ odd C27-C33)/ (∑ even C26-C32)
Stout, 2020	LT32	Missouri	37.75	-92.1	342	12.5	1071	July				Litter											Shaker, DCM			61.9	27	25-35	29.3	∑Ci x i/ ∑Ci , i=27-33			11.1	(∑ odd C27-C33)/ (∑ even C26-C32)
Stout, 2020	LT33	Missouri	37.75	-92.1	342	12.5	1071	July				Litter											Shaker, DCM			52.4	29	25-34	29.6	∑Ci x i/ ∑Ci , i=27-33			13.2	(∑ odd C27-C33)/ (∑ even C26-C32)
Stout, 2020	LT34	Missouri	37.75	-92.1	342	12.5	1071	July				Litter											Shaker, DCM			83.8	27	25-35	29.6	∑Ci x i/ ∑Ci , i=27-33			19.3	(∑ odd C27-C33)/ (∑ even C26-C32)
Stout, 2020	LT35	Missouri	37.75	-92.1	342	12.5	1071	July				Litter											Shaker, DCM			62.3	29	25-35	29.4	∑Ci x i/ ∑Ci , i=27-33			13.7	(∑ odd C27-C33)/ (∑ even C26-C32)
Stout, 2020	LT36	Missouri	37.75	-92.1	342	12.5	1071	July				Litter											Shaker, DCM			70.1	27	25-35	29	∑Ci x i/ ∑Ci , i=27-33			11.7	(∑ odd C27-C33)/ (∑ even C26-C32)
Stout, 2020	LT37	Missouri	37.75	-92.1	342	12.5	1071	July				Litter											Shaker, DCM			53.8	29	25-35	29.4	∑Ci x i/ ∑Ci , i=27-33			11.3	(∑ odd C27-C33)/ (∑ even C26-C32)
Stout, 2020	LT38	Missouri	37.75	-92.1	342	12.5	1071	July				Litter											Shaker, DCM			74.7	29	25-34	29.7	∑Ci x i/ ∑Ci , i=27-33			15.9	(∑ odd C27-C33)/ (∑ even C26-C32)
Stout, 2020	LT39	Missouri	37.75	-92.1	342	12.5	1071	July				Litter											Shaker, DCM			72.4	29	25-34	29.7	∑Ci x i/ ∑Ci , i=27-33			15.7	(∑ odd C27-C33)/ (∑ even C26-C32)
Stout, 2020	LT40	Missouri	37.75	-92.1	342	12.5	1071	July				Litter											Shaker, DCM			86	29	25-35	29.2	∑Ci x i/ ∑Ci , i=27-33			7.9	(∑ odd C27-C33)/ (∑ even C26-C32)
Stout, 2020	LT41	Missouri	37.75	-92.1	342	12.5	1071	July				Litter											Shaker, DCM			47.8	29	25-35	29.5	∑Ci x i/ ∑Ci , i=27-33			10.3	(∑ odd C27-C33)/ (∑ even C26-C32)
Stout, 2020	SL1	Missouri	37.75	-92.1	342	12.5	1071	July	0	0.05													Shaker, DCM			13.4	29	25-35	29.6	∑Ci x i/ ∑Ci , i=27-33			12	(∑ odd C27-C33)/ (∑ even C26-C32)
Stout, 2020	SL2	Missouri	37.75	-92.1	342	12.5	1071	July	0	0.05													Shaker, DCM			12.18	29	25-35	29.8	∑Ci x i/ ∑Ci , i=27-33			9.8	(∑ odd C27-C33)/ (∑ even C26-C32)
Stout, 2020	SL3	Missouri	37.75	-92.1	342	12.5	1071	July	0	0.05													Shaker, DCM			12.35	29	25-35	29.6	∑Ci x i/ ∑Ci , i=27-33			8.7	(∑ odd C27-C33)/ (∑ even C26-C32)
Stout, 2020	SL4	Missouri	37.75	-92.1	342	12.5	1071	July	0	0.05													Shaker, DCM			9.63	31	25-35	30.3	∑Ci x i/ ∑Ci , i=27-33			9.1	(∑ odd C27-C33)/ (∑ even C26-C32)
Stout, 2020	SL5	Missouri	37.75	-92.1	342	12.5	1071	July	0	0.05													Shaker, DCM			13.24	29	25-35	29.5	∑Ci x i/ ∑Ci , i=27-33			9.2	(∑ odd C27-C33)/ (∑ even C26-C32)
Stout, 2020	SL6	Missouri	37.75	-92.1	342	12.5	1071	July	0	0.05													Shaker, DCM			12	27	25-35	29.6	∑Ci x i/ ∑Ci , i=27-33			9.3	(∑ odd C27-C33)/ (∑ even C26-C32)
Stout, 2020	SL7	Missouri	37.75	-92.1	342	12.5	1071	July	0	0.05													Shaker, DCM			12.93	31	25-35	30	∑Ci x i/ ∑Ci , i=27-33			10.2	(∑ odd C27-C33)/ (∑ even C26-C32)
Stout, 2020	SL8	Missouri	37.75	-92.1	342	12.5	1071	July	0	0.05													Shaker, DCM			13.88	31	25-35	29.7	∑Ci x i/ ∑Ci , i=27-33			10.6	(∑ odd C27-C33)/ (∑ even C26-C32)
Stout, 2020	SL9	Missouri	37.75	-92.1	342	12.5	1071	July	0	0.05													Shaker, DCM			13.46	27	25-35	29.3	∑Ci x i/ ∑Ci , i=27-33			8.7	(∑ odd C27-C33)/ (∑ even C26-C32)
Stout, 2020	SL10	Missouri	37.75	-92.1	342	12.5	1071	July	0	0.05													Shaker, DCM			14.39	27	25-35	29.5	∑Ci x i/ ∑Ci , i=27-33			17.5	(∑ odd C27-C33)/ (∑ even C26-C32)
Stout, 2020	SL11	Missouri	37.75	-92.1	342	12.5	1071	July	0	0.05													Shaker, DCM			41.44	29	25-35	29.7	∑Ci x i/ ∑Ci , i=27-33			12.3	(∑ odd C27-C33)/ (∑ even C26-C32)
Stout, 2020	SL12	Missouri	37.75	-92.1	342	12.5	1071	July	0	0.05													Shaker, DCM			13.72	29	25-35	29.3	∑Ci x i/ ∑Ci , i=27-33			10.2	(∑ odd C27-C33)/ (∑ even C26-C32)
Stout, 2020	SL13	Missouri	37.75	-92.1	342	12.5	1071	July	0	0.05													Shaker, DCM			14.63	29	25-35	29.6	∑Ci x i/ ∑Ci , i=27-33			14.4	(∑ odd C27-C33)/ (∑ even C26-C32)
Stout, 2020	SL14	Missouri	37.75	-92.1	342	12.5	1071	July	0	0.05													Shaker, DCM			13.11	27	25-35	29.4	∑Ci x i/ ∑Ci , i=27-33			12.9	(∑ odd C27-C33)/ (∑ even C26-C32)
Stout, 2020	SL15	Missouri	37.75	-92.1	342	12.5	1071	July	0	0.05													Shaker, DCM			33.74	29	25-35	29.9	∑Ci x i/ ∑Ci , i=27-33			9.3	(∑ odd C27-C33)/ (∑ even C26-C32)
Stout, 2020	SL16	Missouri	37.75	-92.1	342	12.5	1071	July	0	0.05													Shaker, DCM			13.87	29	25-35	29.2	∑Ci x i/ ∑Ci , i=27-33			10.2	(∑ odd C27-C33)/ (∑ even C26-C32)
Stout, 2020	SL17	Missouri	37.75	-92.1	342	12.5	1071	July	0	0.05													Shaker, DCM			10.97	29	25-35	29.5	∑Ci x i/ ∑Ci , i=27-33			9.9	(∑ odd C27-C33)/ (∑ even C26-C32)
Stout, 2020	SL18	Missouri	37.75	-92.1	342	12.5	1071	July	0	0.05													Shaker, DCM			6.87	27	25-35	29.3	∑Ci x i/ ∑Ci , i=27-33			6.9	(∑ odd C27-C33)/ (∑ even C26-C32)
Stout, 2020	SL19	Missouri	37.75	-92.1	342	12.5	1071	July	0	0.05													Shaker, DCM			17.06	27	25-35	29.5	∑Ci x i/ ∑Ci , i=27-33			8.2	(∑ odd C27-C33)/ (∑ even C26-C32)
Stout, 2020	SL20	Missouri	37.75	-92.1	342	12.5	1071	July	0	0.05													Shaker, DCM			14.12	31	25-35	29.9	∑Ci x i/ ∑Ci , i=27-33			14.1	(∑ odd C27-C33)/ (∑ even C26-C32)
Stout, 2020	SL21	Missouri	37.75	-92.1	342	12.5	1071	July	0	0.05													Shaker, DCM			13.94	31	25-35	29.8	∑Ci x i/ ∑Ci , i=27-33			9.6	(∑ odd C27-C33)/ (∑ even C26-C32)
Stout, 2020	SL22	Missouri	37.75	-92.1	342	12.5	1071	July	0	0.05													Shaker, DCM			13.03	31	25-35	30.1	∑Ci x i/ ∑Ci , i=27-33			10.3	(∑ odd C27-C33)/ (∑ even C26-C32)
Stout, 2020	SL23	Missouri	37.75	-92.1	342	12.5	1071	July	0	0.05													Shaker, DCM			10.93	31	25-35	30.4	∑Ci x i/ ∑Ci , i=27-33			12.2	(∑ odd C27-C33)/ (∑ even C26-C32)
Stout, 2020	SL24	Missouri	37.75	-92.1	342	12.5	1071	July	0	0.05													Shaker, DCM			13.38	33	25-35	30.1	∑Ci x i/ ∑Ci , i=27-33			11.1	(∑ odd C27-C33)/ (∑ even C26-C32)
Stout, 2020	SL25	Missouri	37.75	-92.1	342	12.5	1071	July	0	0.05													Shaker, DCM			13.41	33	25-35	30.5	∑Ci x i/ ∑Ci , i=27-33			13.7	(∑ odd C27-C33)/ (∑ even C26-C32)
Stout, 2020	SL26	Missouri	37.75	-92.1	342	12.5	1071	July	0	0.05													Shaker, DCM			14.35	33	25-35	30.5	∑Ci x i/ ∑Ci , i=27-33			16.8	(∑ odd C27-C33)/ (∑ even C26-C32)
Stout, 2020	SL27	Missouri	37.75	-92.1	342	12.5	1071	July	0	0.05													Shaker, DCM			12.33	31	25-35	30.1	∑Ci x i/ ∑Ci , i=27-33			12.8	(∑ odd C27-C33)/ (∑ even C26-C32)
Stout, 2020	SL28	Missouri	37.75	-92.1	342	12.5	1071	July	0	0.05													Shaker, DCM			44.4	27	25-35	29.5	∑Ci x i/ ∑Ci , i=27-33			10	(∑ odd C27-C33)/ (∑ even C26-C32)
Stout, 2020	SL29	Missouri	37.75	-92.1	342	12.5	1071	July	0	0.05													Shaker, DCM			13.22	29	25-35	29.7	∑Ci x i/ ∑Ci , i=27-33			11.4	(∑ odd C27-C33)/ (∑ even C26-C32)
Stout, 2020	SL30	Missouri	37.75	-92.1	342	12.5	1071	July	0	0.05													Shaker, DCM			13.58	29	25-35	29.7	∑Ci x i/ ∑Ci , i=27-33			14.8	(∑ odd C27-C33)/ (∑ even C26-C32)
Stout, 2020	SL31	Missouri	37.75	-92.1	342	12.5	1071	July	0	0.05													Shaker, DCM			13.79	29	25-35	29.5	∑Ci x i/ ∑Ci , i=27-33			11.7	(∑ odd C27-C33)/ (∑ even C26-C32)
Stout, 2020	SL32	Missouri	37.75	-92.1	342	12.5	1071	July	0	0.05													Shaker, DCM			13.28	29	25-35	29.6	∑Ci x i/ ∑Ci , i=27-33			17.1	(∑ odd C27-C33)/ (∑ even C26-C32)
Stout, 2020	SL33	Missouri	37.75	-92.1	342	12.5	1071	July	0	0.05													Shaker, DCM			13.58	29	25-35	29	∑Ci x i/ ∑Ci , i=27-33			8.4	(∑ odd C27-C33)/ (∑ even C26-C32)
Stout, 2020	SL34	Missouri	37.75	-92.1	342	12.5	1071	July	0	0.05													Shaker, DCM			12.89	29	25-35	29.3	∑Ci x i/ ∑Ci , i=27-33			18.5	(∑ odd C27-C33)/ (∑ even C26-C32)
Stout, 2020	SL35	Missouri	37.75	-92.1	342	12.5	1071	July	0	0.05													Shaker, DCM			40.23	29	25-35	29.6	∑Ci x i/ ∑Ci , i=27-33			10.3	(∑ odd C27-C33)/ (∑ even C26-C32)
Stout, 2020	SL36	Missouri	37.75	-92.1	342	12.5	1071	July	0	0.05													Shaker, DCM			13.69	29	25-35	29.5	∑Ci x i/ ∑Ci , i=27-33			13.5	(∑ odd C27-C33)/ (∑ even C26-C32)
Stout, 2020	SL37	Missouri	37.75	-92.1	342	12.5	1071	July	0	0.05													Shaker, DCM			14.6	29	25-35	29.1	∑Ci x i/ ∑Ci , i=27-33			14.5	(∑ odd C27-C33)/ (∑ even C26-C32)
Stout, 2020	SL38	Missouri	37.75	-92.1	342	12.5	1071	July	0	0.05													Shaker, DCM			12.72	27	25-35	29.2	∑Ci x i/ ∑Ci , i=27-33			10.7	(∑ odd C27-C33)/ (∑ even C26-C32)
Stout, 2020	SL39	Missouri	37.75	-92.1	342	12.5	1071	July	0	0.05													Shaker, DCM			13.64	27	25-35	29.6	∑Ci x i/ ∑Ci , i=27-33			11.4	(∑ odd C27-C33)/ (∑ even C26-C32)
Stout, 2020	SL40	Missouri	37.75	-92.1	342	12.5	1071	July	0	0.05													Shaker, DCM			11.27	31	25-35	30	∑Ci x i/ ∑Ci , i=27-33			9.6	(∑ odd C27-C33)/ (∑ even C26-C32)
Stout, 2020	SL41	Missouri	37.75	-92.1	342	12.5	1071	July	0	0.05													Shaker, DCM			47.92	27	25-35	29.7	∑Ci x i/ ∑Ci , i=27-33			8.6	(∑ odd C27-C33)/ (∑ even C26-C32)
Stout, 2020	SL42	Missouri	37.75	-92.1	342	12.5	1071	July	0	0.05													Shaker, DCM			32.25	31	25-35	29.7	∑Ci x i/ ∑Ci , i=27-33			10.3	(∑ odd C27-C33)/ (∑ even C26-C32)
Stout, 2020	SL43	Missouri	37.75	-92.1	342	12.5	1071	July	0	0.05													Shaker, DCM			35.81	31	25-35	30.2	∑Ci x i/ ∑Ci , i=27-33			8.6	(∑ odd C27-C33)/ (∑ even C26-C32)
Struck et al., 2020	P5	Mongolia	47.4203	106.767	1611	-1.71708	256.389	Summer	0	0.05													ASE, DCM:MeOH			2.29825	31	23-35	30.2656	∑Ci x i/ ∑Ci , i=27-33			5.5253	(∑ odd C27-C33)/ (∑ even C26-C32)
Struck et al., 2020	P6	Mongolia	46.8594	106.635	1376	-0.30846	194.24	Summer	0	0.05													ASE, DCM:MeOH			0.777203	31	23-35	29.9261	∑Ci x i/ ∑Ci , i=27-33			3.93215	(∑ odd C27-C33)/ (∑ even C26-C32)
Struck et al., 2020	P7	Mongolia	45.7099	106.124	1406	1.62145	155.671	Summer	0	0.05													ASE, DCM:MeOH			0.700283	31	23-35	30.1535	∑Ci x i/ ∑Ci , i=27-33			3.76232	(∑ odd C27-C33)/ (∑ even C26-C32)
Struck et al., 2020	P8	Mongolia	45.5778	105.889	1382	1.74822	127.639	Summer	0	0.05													ASE, DCM:MeOH			0.326067	31	23-35	29.6781	∑Ci x i/ ∑Ci , i=27-33			2.01515	(∑ odd C27-C33)/ (∑ even C26-C32)
Struck et al., 2020	P9	Mongolia	45.3603	105.688	1342	2.30154	118.135	Summer	0	0.05													ASE, DCM:MeOH			0.651003	31	23-35	29.5872	∑Ci x i/ ∑Ci , i=27-33			2.72302	(∑ odd C27-C33)/ (∑ even C26-C32)
Struck et al., 2020	P10	Mongolia	44.5844	105.677	1255	3.66719	107.541	Summer	0	0.05													ASE, DCM:MeOH			0.35103	31	23-34	29.7368	∑Ci x i/ ∑Ci , i=27-33			2.39049	(∑ odd C27-C33)/ (∑ even C26-C32)
Struck et al., 2020	P11	Mongolia	44.6219	105.653	1260	3.64007	105.902	Summer	0	0.05													ASE, DCM:MeOH			0.289783	31	23-35	29.6762	∑Ci x i/ ∑Ci , i=27-33			2.21438	(∑ odd C27-C33)/ (∑ even C26-C32)
Struck et al., 2020	P12	Mongolia	44.6675	105.553	1224	3.60611	105.225	Summer	0	0.05													ASE, DCM:MeOH			0.382739	31	23-35	30.3359	∑Ci x i/ ∑Ci , i=27-33			3.13448	(∑ odd C27-C33)/ (∑ even C26-C32)
Struck et al., 2020	P13	Mongolia	44.5061	105.355	1314	3.78265	104.668	Summer	0	0.05													ASE, DCM:MeOH			0.33332	31	23-33	30.3883	∑Ci x i/ ∑Ci , i=27-33			3.23611	(∑ odd C27-C33)/ (∑ even C26-C32)
Struck et al., 2020	P14	Mongolia	44.3263	105.236	1252	4.27765	99.3439	Summer	0	0.05													ASE, DCM:MeOH			0.252208	31	23-33	29.9204	∑Ci x i/ ∑Ci , i=27-33			2.02716	(∑ odd C27-C33)/ (∑ even C26-C32)
Struck et al., 2020	P15	Mongolia	44.1071	105.05	1358	4.42728	104.493	Summer	0	0.05													ASE, DCM:MeOH			0.303036	31	23-33	30.1131	∑Ci x i/ ∑Ci , i=27-33			2.98594	(∑ odd C27-C33)/ (∑ even C26-C32)
Struck et al., 2020	P16	Mongolia	42.8599	105.133	1507	5.19172	102.682	Summer	0	0.05													ASE, DCM:MeOH			0.337774	31	23-35	29.9105	∑Ci x i/ ∑Ci , i=27-33			1.9056	(∑ odd C27-C33)/ (∑ even C26-C32)
Struck et al., 2020	P18	Mongolia	43.0055	105.068	1548	4.73518	108.002	Summer	0	0.05													ASE, DCM:MeOH			0.390346	31	23-35	30.0452	∑Ci x i/ ∑Ci , i=27-33			2.33223	(∑ odd C27-C33)/ (∑ even C26-C32)
Struck et al., 2020	P19	Mongolia	43.1932	104.869	1453	5.51006	108.274	Summer	0	0.05													ASE, DCM:MeOH			0.608944	31	23-35	30.3777	∑Ci x i/ ∑Ci , i=27-33			3.8802	(∑ odd C27-C33)/ (∑ even C26-C32)
Struck et al., 2020	P22	Mongolia	43.5037	103.38	1514	4.3255	107.722	Summer	0	0.05													ASE, DCM:MeOH			0.302165	31	23-35	29.8396	∑Ci x i/ ∑Ci , i=27-33			1.48445	(∑ odd C27-C33)/ (∑ even C26-C32)
Struck et al., 2020	P23	Mongolia	43.5914	103.044	1443	4.87558	104.407	Summer	0	0.05													ASE, DCM:MeOH			0.35693	31	23-35	29.8734	∑Ci x i/ ∑Ci , i=27-33			2.03109	(∑ odd C27-C33)/ (∑ even C26-C32)
Struck et al., 2020	P24	Mongolia	43.7492	102.464	1516	4.28168	108.431	Summer	0	0.05													ASE, DCM:MeOH			0.359348	31	23-35	30.1528	∑Ci x i/ ∑Ci , i=27-33			2.34979	(∑ odd C27-C33)/ (∑ even C26-C32)
Struck et al., 2020	UGC3	Mongolia	47.7642	102.81	1333	-0.529459	273.244	Summer	0	0.05													ASE, DCM:MeOH			1.98604	31	23-35	30.3905	∑Ci x i/ ∑Ci , i=27-33			13.8719	(∑ odd C27-C33)/ (∑ even C26-C32)
Struck et al., 2020	UGC7	Mongolia	47.7503	102.804	1343	-0.511542	273.289	Summer	0	0.05													ASE, DCM:MeOH			3.17134	31	23-35	29.8314	∑Ci x i/ ∑Ci , i=27-33			6.56158	(∑ odd C27-C33)/ (∑ even C26-C32)
Struck et al., 2020	UGC12	Mongolia	47.7467	102.772	1337	-0.579948	276.226	Summer	0	0.05													ASE, DCM:MeOH			1.59665	31	23-35	29.9232	∑Ci x i/ ∑Ci , i=27-33			7.96276	(∑ odd C27-C33)/ (∑ even C26-C32)
Struck et al., 2020	UGC15	Mongolia	47.7424	102.744	1366	-0.796233	275.943	Summer	0	0.05													ASE, DCM:MeOH			1.26344	29	23-35	29.2468	∑Ci x i/ ∑Ci , i=27-33			6.28813	(∑ odd C27-C33)/ (∑ even C26-C32)
Struck et al., 2020	TSC3	Mongolia	48.147	99.7172	2065	-4.04218	223.606	Summer	0	0.05													ASE, DCM:MeOH			2.39544	31	23-35	29.8934	∑Ci x i/ ∑Ci , i=27-33			6.70411	(∑ odd C27-C33)/ (∑ even C26-C32)
Struck et al., 2020	TSC 5	Mongolia	48.1462	99.7487	2054	-3.82958	220.684	Summer	0	0.05													ASE, DCM:MeOH			11.3797	31	23-35	30.5889	∑Ci x i/ ∑Ci , i=27-33			10.8201	(∑ odd C27-C33)/ (∑ even C26-C32)
Struck et al., 2020	TSC 7	Mongolia	48.0817	99.7073	2792	-5.23714	244.625	Summer	0	0.05													ASE, DCM:MeOH			21.5596	31	23-35	30.0962	∑Ci x i/ ∑Ci , i=27-33			9.41817	(∑ odd C27-C33)/ (∑ even C26-C32)
Struck et al., 2020	TSC10	Mongolia	48.09	99.7394	2490	-4.1799	230.666	Summer	0	0.05													ASE, DCM:MeOH			59.818	27	23-35	29.1667	∑Ci x i/ ∑Ci , i=27-33			19.0242	(∑ odd C27-C33)/ (∑ even C26-C32)
Struck et al., 2020	T1	Mongolia	48.2396	99.0199	2235	-5.02071	230.984	Summer	0	0.05													ASE, DCM:MeOH			12.796	31	23-35	30.4458	∑Ci x i/ ∑Ci , i=27-33			11.476	(∑ odd C27-C33)/ (∑ even C26-C32)
Struck et al., 2020	T2	Mongolia	48.2486	99.0066	2284	-5.74404	239.672	Summer	0	0.05													ASE, DCM:MeOH			19.7896	31	23-35	30.5988	∑Ci x i/ ∑Ci , i=27-33			9.01976	(∑ odd C27-C33)/ (∑ even C26-C32)
Struck et al., 2020	T3	Mongolia	48.2626	98.9881	2382	-6.54703	245.15	Summer	0	0.05													ASE, DCM:MeOH			12.0223	31	23-35	30.4829	∑Ci x i/ ∑Ci , i=27-33			8.19944	(∑ odd C27-C33)/ (∑ even C26-C32)
Struck et al., 2020	T4	Mongolia	48.2789	98.9776	2475	-6.97844	251.762	Summer	0	0.05													ASE, DCM:MeOH			15.554	31	23-35	30.1823	∑Ci x i/ ∑Ci , i=27-33			10.0036	(∑ odd C27-C33)/ (∑ even C26-C32)
Struck et al., 2020	T5	Mongolia	48.2939	98.9539	2528	-7.29415	257.05	Summer	0	0.05													ASE, DCM:MeOH			11.6864	25	23-35	29.2181	∑Ci x i/ ∑Ci , i=27-33			4.7725	(∑ odd C27-C33)/ (∑ even C26-C32)
Struck et al., 2020	T6	Mongolia	48.2963	98.94	2441	-7.06718	254.318	Summer	0	0.05													ASE, DCM:MeOH			22.3533	31	23-35	30.0633	∑Ci x i/ ∑Ci , i=27-33			10.7506	(∑ odd C27-C33)/ (∑ even C26-C32)
Struck et al., 2020	T7a	Mongolia	48.3058	98.9221	2343	-6.52052	252.866	Summer	0	0.05													ASE, DCM:MeOH			1.76696	31	23-35	30.2964	∑Ci x i/ ∑Ci , i=27-33			7.19031	(∑ odd C27-C33)/ (∑ even C26-C32)
Struck et al., 2020	T7b	Mongolia	48.3058	98.9221	2343	-6.52052	252.866	Summer	0	0.05													ASE, DCM:MeOH			2.80607	31	23-35	30.3232	∑Ci x i/ ∑Ci , i=27-33			7.26097	(∑ odd C27-C33)/ (∑ even C26-C32)
Struck et al., 2020	T8	Mongolia	48.3139	98.9155	2260	-6.19822	252.505	Summer	0	0.05													ASE, DCM:MeOH			16.1277	33	23-35	31.7846	∑Ci x i/ ∑Ci , i=27-33			13.6952	(∑ odd C27-C33)/ (∑ even C26-C32)
Struck et al., 2020	T9	Mongolia	48.3252	98.9075	2198	-5.72238	251.866	Summer	0	0.05													ASE, DCM:MeOH			29.3572	31	23-35	30.3883	∑Ci x i/ ∑Ci , i=27-33			12.4142	(∑ odd C27-C33)/ (∑ even C26-C32)
Struck et al., 2020	T10	Mongolia	48.3497	98.9159	2133	-5.05131	238.188	Summer	0	0.05													ASE, DCM:MeOH			1.51314	31	23-35	30.442	∑Ci x i/ ∑Ci , i=27-33			7.77067	(∑ odd C27-C33)/ (∑ even C26-C32)
Struck et al., 2020	T11	Mongolia	48.4224	98.9042	1948	-3.51143	221.907	Summer	0	0.05													ASE, DCM:MeOH			4.39614	31	23-35	30.1359	∑Ci x i/ ∑Ci , i=27-33			8.4326	(∑ odd C27-C33)/ (∑ even C26-C32)
Struck et al., 2020	TLC1	Mongolia	48.7893	97.2981	1796	-5.47075	213.561	Summer	0	0.05													ASE, DCM:MeOH			2.26747	31	23-35	29.9636	∑Ci x i/ ∑Ci , i=27-33			9.40966	(∑ odd C27-C33)/ (∑ even C26-C32)
Struck et al., 2020	TLC2	Mongolia	48.7892	97.3017	1792	-5.47112	213.235	Summer	0	0.05													ASE, DCM:MeOH			2.02173	31	23-35	30.1211	∑Ci x i/ ∑Ci , i=27-33			9.01078	(∑ odd C27-C33)/ (∑ even C26-C32)
Struck et al., 2020	TLC3	Mongolia	48.7881	97.3043	1797	-5.47965	213.192	Summer	0	0.05													ASE, DCM:MeOH			10.9845	33	23-35	31.2549	∑Ci x i/ ∑Ci , i=27-33			14.9481	(∑ odd C27-C33)/ (∑ even C26-C32)
Struck et al., 2020	TLC4	Mongolia	48.7596	97.3024	1942	-6.34965	217.819	Summer	0	0.05													ASE, DCM:MeOH			4.64419	33	23-35	30.7333	∑Ci x i/ ∑Ci , i=27-33			10.0877	(∑ odd C27-C33)/ (∑ even C26-C32)
Struck et al., 2020	TLC5	Mongolia	48.7913	97.339	1802	-5.60691	212.14	Summer	0	0.05													ASE, DCM:MeOH			1.29832	31	23-35	30.0716	∑Ci x i/ ∑Ci , i=27-33			9.09941	(∑ odd C27-C33)/ (∑ even C26-C32)
Struck et al., 2020	TLC6	Mongolia	48.795	97.3476	1841	-5.62719	210.804	Summer	0	0.05													ASE, DCM:MeOH			10.7689	29	23-35	30.0974	∑Ci x i/ ∑Ci , i=27-33			11.2055	(∑ odd C27-C33)/ (∑ even C26-C32)
Struck et al., 2020	TLC7	Mongolia	48.8009	97.3718	1852	-5.69476	211.603	Summer	0	0.05													ASE, DCM:MeOH			1.05647	31	23-35	29.9393	∑Ci x i/ ∑Ci , i=27-33			6.08166	(∑ odd C27-C33)/ (∑ even C26-C32)
Struck et al., 2020	TLC8	Mongolia	48.8037	97.3768	1808	-5.6755	211.941	Summer	0	0.05													ASE, DCM:MeOH			2.30268	31	23-35	30.1769	∑Ci x i/ ∑Ci , i=27-33			8.80621	(∑ odd C27-C33)/ (∑ even C26-C32)
Struck et al., 2020	TLC9	Mongolia	48.7927	97.3339	1811	-5.54936	211.903	Summer	0	0.05													ASE, DCM:MeOH			8.21814	33	23-35	30.9773	∑Ci x i/ ∑Ci , i=27-33			10.891	(∑ odd C27-C33)/ (∑ even C26-C32)
Struck et al., 2020	TLC10	Mongolia	48.7881	97.3321	1797	-5.57579	212.492	Summer	0	0.05													ASE, DCM:MeOH			3.20891	31	23-35	30.3008	∑Ci x i/ ∑Ci , i=27-33			10.1832	(∑ odd C27-C33)/ (∑ even C26-C32)
Struck et al., 2020	TLC11	Mongolia	48.788	97.3397	1814	-5.65176	212.37	Summer	0	0.05													ASE, DCM:MeOH			3.04811	31	23-35	29.9971	∑Ci x i/ ∑Ci , i=27-33			10.5122	(∑ odd C27-C33)/ (∑ even C26-C32)
Struck et al., 2020	TLC12	Mongolia	48.7826	97.3285	1799	-5.62439	211.874	Summer	0	0.05													ASE, DCM:MeOH			4.85668	31	23-35	30.2844	∑Ci x i/ ∑Ci , i=27-33			9.17952	(∑ odd C27-C33)/ (∑ even C26-C32)
Struck et al., 2020	TLC13	Mongolia	48.7696	97.3	1859	-5.90778	214.261	Summer	0	0.05													ASE, DCM:MeOH			14.7851	31	23-35	30.5288	∑Ci x i/ ∑Ci , i=27-33			8.62089	(∑ odd C27-C33)/ (∑ even C26-C32)
Struck et al., 2020	TLC14	Mongolia	48.7464	97.2227	1952	-6.3443	220.433	Summer	0	0.05													ASE, DCM:MeOH			3.54653	31	23-35	30.1014	∑Ci x i/ ∑Ci , i=27-33			7.62207	(∑ odd C27-C33)/ (∑ even C26-C32)
Struck et al., 2020	TLC15	Mongolia	48.7649	97.248	1895	-6.12481	216.24	Summer	0	0.05													ASE, DCM:MeOH			3.5427	31	23-35	30.2452	∑Ci x i/ ∑Ci , i=27-33			7.2758	(∑ odd C27-C33)/ (∑ even C26-C32)
Struck et al., 2020	TLC1 P1	Mongolia	48.7893	97.2981	1796	-5.47075	213.561	Summer				Fresh material											ASE, DCM:MeOH			221.814	29	23-35	29.5675	∑Ci x i/ ∑Ci , i=27-33			15.7187	(∑ odd C27-C33)/ (∑ even C26-C32)
Struck et al., 2020	TLC1 P3	Mongolia	48.7893	97.2981	1796	-5.47075	213.561	Summer				Fresh material											ASE, DCM:MeOH			27.4652	31	23-35	29.8319	∑Ci x i/ ∑Ci , i=27-33			11.1157	(∑ odd C27-C33)/ (∑ even C26-C32)
Struck et al., 2020	TLC2 P3	Mongolia	48.7892	97.3017	1792	-5.47112	213.235	Summer				Fresh material											ASE, DCM:MeOH			70.4038	31	23-35	29.8319	∑Ci x i/ ∑Ci , i=27-33			11.1157	(∑ odd C27-C33)/ (∑ even C26-C32)
Struck et al., 2020	TLC3 P1	Mongolia	48.7881	97.3043	1797	-5.47965	213.192	Summer				Fresh material											ASE, DCM:MeOH			171.631	29	23-33	29.7003	∑Ci x i/ ∑Ci , i=27-33			11.0837	(∑ odd C27-C33)/ (∑ even C26-C32)
Struck et al., 2020	TLC3 P2	Mongolia	48.7881	97.3043	1797			Summer				Fresh material											ASE, DCM:MeOH			226.275	29	23-35	29.5306	∑Ci x i/ ∑Ci , i=27-33			13.9045	(∑ odd C27-C33)/ (∑ even C26-C32)
Struck et al., 2020	TLC8 P1	Mongolia	48.8037	97.3768	1808			Summer				Fresh material											ASE, DCM:MeOH			582.587	31	23-33	29.8207	∑Ci x i/ ∑Ci , i=27-33			12.8815	(∑ odd C27-C33)/ (∑ even C26-C32)
Struck et al., 2020	TLC9 P1	Mongolia	48.7927	97.3339	1811			Summer				Fresh material											ASE, DCM:MeOH			849.002	29	23-35	29.8612	∑Ci x i/ ∑Ci , i=27-33			12.8282	(∑ odd C27-C33)/ (∑ even C26-C32)
Struck et al., 2020	TLC10 P1	Mongolia	48.7881	97.3321	1797			Summer				Fresh material											ASE, DCM:MeOH			232.443	29	23-35	29.5607	∑Ci x i/ ∑Ci , i=27-33			14.0158	(∑ odd C27-C33)/ (∑ even C26-C32)
Struck et al., 2020	TLC10 P2	Mongolia	48.7881	97.3321	1797			Summer				Fresh material											ASE, DCM:MeOH			219.578	29	23-35	30.1486	∑Ci x i/ ∑Ci , i=27-33			13.5078	(∑ odd C27-C33)/ (∑ even C26-C32)
Struck et al., 2020	T1 P2	Mongolia	48.2396	99.0199	2235			Summer				Fresh material											ASE, DCM:MeOH			405.663	29	23-35	29.3292	∑Ci x i/ ∑Ci , i=27-33			12.9074	(∑ odd C27-C33)/ (∑ even C26-C32)
Struck et al., 2020	TSC3 P2	Mongolia	48.147	99.7172	2065			Summer				Fresh material											ASE, DCM:MeOH			137.484	29	23-35	29.2934	∑Ci x i/ ∑Ci , i=27-33			9.53504	(∑ odd C27-C33)/ (∑ even C26-C32)
Struck et al., 2020	TSC5 P1	Mongolia	48.1462	99.7487	2054			Summer				Fresh material											ASE, DCM:MeOH			93.4539	29	23-35	29.317	∑Ci x i/ ∑Ci , i=27-33			12.0307	(∑ odd C27-C33)/ (∑ even C26-C32)
Struck et al., 2020	UGC15 P1	Mongolia	47.7424	102.744	1366			Summer				Fresh material											ASE, DCM:MeOH			412.543	31	23-35	30.4161	∑Ci x i/ ∑Ci , i=27-33			12.3741	(∑ odd C27-C33)/ (∑ even C26-C32)
Struck et al., 2020	TLC4 P1	Mongolia	48.7596	97.3024	1942			Summer				Fresh material											ASE, DCM:MeOH			1896.11	29	23-33	29.4874	∑Ci x i/ ∑Ci , i=27-33			37.959	(∑ odd C27-C33)/ (∑ even C26-C32)
Struck et al., 2020	TLC5 P1	Mongolia	48.7913	97.339	1802			Summer				Fresh material											ASE, DCM:MeOH			1110.31	29	23-33	29.4243	∑Ci x i/ ∑Ci , i=27-33			36.6383	(∑ odd C27-C33)/ (∑ even C26-C32)
Struck et al., 2020	TLC6 P1	Mongolia	48.795	97.3476	1841			Summer				Fresh material											ASE, DCM:MeOH			949.914	29	23-33	29.255	∑Ci x i/ ∑Ci , i=27-33			23.0313	(∑ odd C27-C33)/ (∑ even C26-C32)
Struck et al., 2020	TLC7 P1	Mongolia	48.8009	97.3718	1852			Summer				Fresh material											ASE, DCM:MeOH			2511.2	29	23-33	29.3662	∑Ci x i/ ∑Ci , i=27-33			38.8145	(∑ odd C27-C33)/ (∑ even C26-C32)
Struck et al., 2020	TLC9 P2	Mongolia	48.7927	97.3339	1811			Summer				Fresh material											ASE, DCM:MeOH			584.231	31	23-33	30.2504	∑Ci x i/ ∑Ci , i=27-33			16.4976	(∑ odd C27-C33)/ (∑ even C26-C32)
Struck et al., 2020	TLC9 P3	Mongolia	48.7927	97.3339	1811			Summer				Fresh material											ASE, DCM:MeOH			1342.43	29	23-33	29.4953	∑Ci x i/ ∑Ci , i=27-33			31.7596	(∑ odd C27-C33)/ (∑ even C26-C32)
Struck et al., 2020	TLC11 P2	Mongolia	48.788	97.3397	1814			Summer				Fresh material											ASE, DCM:MeOH			567.441	31	23-33	29.895	∑Ci x i/ ∑Ci , i=27-33			20.0993	(∑ odd C27-C33)/ (∑ even C26-C32)
Struck et al., 2020	TLC13 P1	Mongolia	48.7696	97.3	1859			Summer				Fresh material											ASE, DCM:MeOH			1402.95	29	23-33	29.4899	∑Ci x i/ ∑Ci , i=27-33			31.2578	(∑ odd C27-C33)/ (∑ even C26-C32)
Struck et al., 2020	TLC5 P2	Mongolia	48.7913	97.339	1802			Summer				Fresh material											ASE, DCM:MeOH			33.0906	29	23-33	29.1227	∑Ci x i/ ∑Ci , i=27-33			9.09786	(∑ odd C27-C33)/ (∑ even C26-C32)
Struck et al., 2020	TSC3 P4	Mongolia	48.147	99.7172	2065			Summer				Fresh material											ASE, DCM:MeOH			64.4846	31	23-35	30.7187	∑Ci x i/ ∑Ci , i=27-33			15.6791	(∑ odd C27-C33)/ (∑ even C26-C32)
Struck et al., 2020	TSC7 P2	Mongolia	48.0817	99.7073	2792			Summer				Fresh material											ASE, DCM:MeOH			14.4347	27	23-35	28.8815	∑Ci x i/ ∑Ci , i=27-33			15.7026	(∑ odd C27-C33)/ (∑ even C26-C32)
Struck et al., 2020	UGC15 P2	Mongolia	47.7424	102.744	1366			Summer				Fresh material											ASE, DCM:MeOH			86.581	31	23-35	30.4395	∑Ci x i/ ∑Ci , i=27-33			12.4586	(∑ odd C27-C33)/ (∑ even C26-C32)
Struck et al., 2020	TLC7 P2	Mongolia	48.8009	97.3718	1852			Summer				Fresh material											ASE, DCM:MeOH			83.737	29	23-33	29.1929	∑Ci x i/ ∑Ci , i=27-33			9.36015	(∑ odd C27-C33)/ (∑ even C26-C32)
Struck et al., 2020	TLC15 P2	Mongolia	48.7649	97.248	1895			Summer				Fresh material											ASE, DCM:MeOH			570.429	31	23-35	30.4534	∑Ci x i/ ∑Ci , i=27-33			23.5343	(∑ odd C27-C33)/ (∑ even C26-C32)
Struck et al., 2020	T8 P2	Mongolia	48.3139	98.9155	2260			Summer				Fresh material											ASE, DCM:MeOH			455.946	31	23-35	30.1242	∑Ci x i/ ∑Ci , i=27-33			26.6298	(∑ odd C27-C33)/ (∑ even C26-C32)
Struck et al., 2020	T9 P1	Mongolia	48.3252	98.9075	2198			Summer				Fresh material											ASE, DCM:MeOH			785.326	31	23-35	29.9592	∑Ci x i/ ∑Ci , i=27-33			16.9148	(∑ odd C27-C33)/ (∑ even C26-C32)
Struck et al., 2020	TLC12 P1	Mongolia	48.7826	97.3285	1799			Summer				Fresh material											ASE, DCM:MeOH			105.579	31	23-33	29.7467	∑Ci x i/ ∑Ci , i=27-33			12.4187	(∑ odd C27-C33)/ (∑ even C26-C32)
Struck et al., 2020	T6 P2	Mongolia	48.2963	98.94	2441			Summer				Fresh material											ASE, DCM:MeOH			285.547	29	23-35	29.733	∑Ci x i/ ∑Ci , i=27-33			21.1127	(∑ odd C27-C33)/ (∑ even C26-C32)
Struck et al., 2020	TLC14 P2	Mongolia	48.7464	97.2227	1952			Summer				Fresh material											ASE, DCM:MeOH			497.948	31	23-35	30.5572	∑Ci x i/ ∑Ci , i=27-33			24.8665	(∑ odd C27-C33)/ (∑ even C26-C32)
Struck et al., 2020	T3 P1	Mongolia	48.2626	98.9881	2382			Summer				Fresh material											ASE, DCM:MeOH			82.0687	29	23-33	29.4677	∑Ci x i/ ∑Ci , i=27-33			13.1387	(∑ odd C27-C33)/ (∑ even C26-C32)
Struck et al., 2020	TSC5 P2	Mongolia	48.1462	99.7487	2054			Summer				Fresh material											ASE, DCM:MeOH			318.26	29	23-33	29.0519	∑Ci x i/ ∑Ci , i=27-33			15.631	(∑ odd C27-C33)/ (∑ even C26-C32)
Struck et al., 2020	TSC7 P1	Mongolia	48.0817	99.7073	2792			Summer				Fresh material											ASE, DCM:MeOH			144.489	31	23-33	29.9624	∑Ci x i/ ∑Ci , i=27-33			15.8235	(∑ odd C27-C33)/ (∑ even C26-C32)
Struck et al., 2020	UGC7 P1	Mongolia	47.7503	102.804	1343			Summer				Fresh material											ASE, DCM:MeOH			84.5993	31	23-33	29.9301	∑Ci x i/ ∑Ci , i=27-33			6.43774	(∑ odd C27-C33)/ (∑ even C26-C32)
Struck et al., 2020	UGC12 P1	Mongolia	47.7467	102.772	1337			Summer				Fresh material											ASE, DCM:MeOH			305.589	31	23-35	30.4356	∑Ci x i/ ∑Ci , i=27-33			11.5541	(∑ odd C27-C33)/ (∑ even C26-C32)
Struck et al., 2020	T2P1	Mongolia	48.2486	99.0066	2284			Summer				Fresh material											ASE, DCM:MeOH			22.7003	25	23-33	28.3979	∑Ci x i/ ∑Ci , i=27-33			5.33065	(∑ odd C27-C33)/ (∑ even C26-C32)
Struck et al., 2020	T6 P1	Mongolia	48.2963	98.94	2441			Summer				Fresh material											ASE, DCM:MeOH			25.2974	25	23-33	28.4125	∑Ci x i/ ∑Ci , i=27-33			5.08457	(∑ odd C27-C33)/ (∑ even C26-C32)
Struck et al., 2020	T7 P1	Mongolia	48.3058	98.9221	2343			Summer				Fresh material											ASE, DCM:MeOH			31.076	25	23-33	28.2763	∑Ci x i/ ∑Ci , i=27-33			4.34477	(∑ odd C27-C33)/ (∑ even C26-C32)
Struck et al., 2020	T8 P1	Mongolia	48.3139	98.9155	2260			Summer				Fresh material											ASE, DCM:MeOH			16.0273	25	23-33	28.7034	∑Ci x i/ ∑Ci , i=27-33			4.68494	(∑ odd C27-C33)/ (∑ even C26-C32)
Struck et al., 2020	T9 P2	Mongolia	48.3252	98.9075	2198			Summer				Fresh material											ASE, DCM:MeOH			19.5432	25	23-33	28.7964	∑Ci x i/ ∑Ci , i=27-33			4.8823	(∑ odd C27-C33)/ (∑ even C26-C32)
Struck et al., 2020	T10 P1	Mongolia	48.3497	98.9159	2133			Summer				Fresh material											ASE, DCM:MeOH			46.9147	29	23-33	29.7915	∑Ci x i/ ∑Ci , i=27-33			8.49058	(∑ odd C27-C33)/ (∑ even C26-C32)
Struck et al., 2020	TSC10 P1	Mongolia	48.09	99.7394	2490			Summer				Fresh material											ASE, DCM:MeOH			11.5155	25	23-31	28.4407	∑Ci x i/ ∑Ci , i=27-33			13.8141	(∑ odd C27-C33)/ (∑ even C26-C32)
Trigui et al., 2019	Sevkar	Armenia	45.1667	41	680-960	11	450-550					Fresh material	Fresh_leaves									rubus	Soxhlet, DCM: MeOH			90.0432	31	25-35	29.748	∑Ci x i/ ∑Ci , i=27-33			12.2824	(∑ odd C27-C33)/ (∑ even C26-C32)
Trigui et al., 2019	Sevkar	Armenia	45.1667	41	680-960	11	450-550					Fresh material	Fresh_leaves									fraxinus	Soxhlet, DCM: MeOH			401.608	31	25-35	30.7861	∑Ci x i/ ∑Ci , i=27-33			9.94676	(∑ odd C27-C33)/ (∑ even C26-C32)
Trigui et al., 2019	Sevkar	Armenia	45.1667	41	680-960	11	450-550					Fresh material	Fresh_leaves									crategeous	Soxhlet, DCM: MeOH			308.127	29	25-35	29.7998	∑Ci x i/ ∑Ci , i=27-33			23.0866	(∑ odd C27-C33)/ (∑ even C26-C32)
Trigui et al., 2019	Sevkar	Armenia	45.1667	41	680-960	11	450-550					Fresh material	Fresh_leaves									cornus	Soxhlet, DCM: MeOH			136.257	29	25-35	29.338	∑Ci x i/ ∑Ci , i=27-33			13.8115	(∑ odd C27-C33)/ (∑ even C26-C32)
Trigui et al., 2019	Sevkar	Armenia	45.1667	41	680-960	11	450-550					Fresh material	Fresh_leaves									acer pseudo	Soxhlet, DCM: MeOH			582.533	29	25-35	29.9636	∑Ci x i/ ∑Ci , i=27-33			16.9233	(∑ odd C27-C33)/ (∑ even C26-C32)
Trigui et al., 2019	Sevkar	Armenia	45.1667	41	680-960	11	450-550					Fresh material	Fresh_leaves									pyrus	Soxhlet, DCM: MeOH			93.0933	29	25-35	29.5755	∑Ci x i/ ∑Ci , i=27-33			29.9445	(∑ odd C27-C33)/ (∑ even C26-C32)
Trigui et al., 2019	Sevkar	Armenia	45.1667	41	680-960	11	450-550					Fresh material	Fresh_leaves									fagus orientalus	Soxhlet, DCM: MeOH			369.005	25	25-35	28.6506	∑Ci x i/ ∑Ci , i=27-33			14.5454	(∑ odd C27-C33)/ (∑ even C26-C32)
Trigui et al., 2019	Sevkar	Armenia	45.1667	41	680-960	11	450-550					Fresh material	Fresh_leaves									prunus	Soxhlet, DCM: MeOH			646.888	29	25-33	29.8888	∑Ci x i/ ∑Ci , i=27-33			22.9566	(∑ odd C27-C33)/ (∑ even C26-C32)
Trigui et al., 2019	Sevkar	Armenia	45.1667	41	680-960	11	450-550					Fresh material	Fresh_leaves									Castanea	Soxhlet, DCM: MeOH			38.944	29	25-35	29.3884	∑Ci x i/ ∑Ci , i=27-33			8.80546	(∑ odd C27-C33)/ (∑ even C26-C32)
Trigui et al., 2019	Sevkar	Armenia	45.1667	41	680-960	11	450-550					Fresh material	Fresh_leaves									Quercus	Soxhlet, DCM: MeOH			210.724	29	25-35	28.8003	∑Ci x i/ ∑Ci , i=27-33			15.7501	(∑ odd C27-C33)/ (∑ even C26-C32)
Trigui et al., 2019	kb	Armenia	45.1667	41	680-960	11	450-550					Fresh material	Fresh_leaves									Crategeous	Soxhlet, DCM: MeOH			2655.12	29	25-35	29.5248	∑Ci x i/ ∑Ci , i=27-33			14.4293	(∑ odd C27-C33)/ (∑ even C26-C32)
Trigui et al., 2019	kb	Armenia	45.1667	41	680-960	11	450-550					Fresh material	Fresh_leaves									betula	Soxhlet, DCM: MeOH			80.1944	31	25-35	30.5991	∑Ci x i/ ∑Ci , i=27-33			21.5849	(∑ odd C27-C33)/ (∑ even C26-C32)
Trigui et al., 2019	kb	Armenia	45.1667	41	680-960	11	450-550					Fresh material	Fresh_leaves									Quercus	Soxhlet, DCM: MeOH			1359.93	29	25-35	29.2635	∑Ci x i/ ∑Ci , i=27-33			30.043	(∑ odd C27-C33)/ (∑ even C26-C32)
Trigui et al., 2019	Arg	Armenia	45.1667	41	680-960	11	450-550					Fresh material	Fresh_leaves									Acer pseudo	Soxhlet, DCM: MeOH			1730.27	31	25-35	30.3755	∑Ci x i/ ∑Ci , i=27-33			17.7559	(∑ odd C27-C33)/ (∑ even C26-C32)
Trigui et al., 2019	Arg	Armenia	45.1667	41	680-960	11	450-550					Fresh material	Fresh_leaves									Carpinus betulus	Soxhlet, DCM: MeOH			651.723	29	25-35	29.8548	∑Ci x i/ ∑Ci , i=27-33			13.4424	(∑ odd C27-C33)/ (∑ even C26-C32)
Trigui et al., 2019	Arg	Armenia	45.1667	41	680-960	11	450-550					Fresh material	Fresh_leaves									carpinus orientalus	Soxhlet, DCM: MeOH			80.9017	29	25-35	29.203	∑Ci x i/ ∑Ci , i=27-33			9.01025	(∑ odd C27-C33)/ (∑ even C26-C32)
Trigui et al., 2019	Arg	Armenia	45.1667	41	680-960	11	450-550					Fresh material	Fresh_leaves									Paliurus	Soxhlet, DCM: MeOH			202.926	31	25-35	30.0434	∑Ci x i/ ∑Ci , i=27-33			7.53059	(∑ odd C27-C33)/ (∑ even C26-C32)
Trigui et al., 2019	Lestiver mid	Armenia	45.1667	41	680-960	11	450-550					Fresh material	Fresh_leaves									pedus	Soxhlet, DCM: MeOH			48.086	31	25-35	30.2282	∑Ci x i/ ∑Ci , i=27-33			20.3272	(∑ odd C27-C33)/ (∑ even C26-C32)
Trigui et al., 2019	Lestiver mid	Armenia	45.1667	41	680-960	11	450-550					Fresh material	Fresh_leaves									prunus	Soxhlet, DCM: MeOH			314.054	29	25-35	29.5999	∑Ci x i/ ∑Ci , i=27-33			17.1313	(∑ odd C27-C33)/ (∑ even C26-C32)
Trigui et al., 2019	Lestiver mid	Armenia	45.1667	41	680-960	11	450-550					Fresh material	Fresh_leaves									Morus	Soxhlet, DCM: MeOH			154.966	35	25-35	30.0665	∑Ci x i/ ∑Ci , i=27-33			10.6405	(∑ odd C27-C33)/ (∑ even C26-C32)
Trigui et al., 2019	Lestiver mid	Armenia	45.1667	41	680-960	11	450-550					Fresh material	Fresh_leaves									aesculus	Soxhlet, DCM: MeOH			159.88	27	25-33	28.2062	∑Ci x i/ ∑Ci , i=27-33			8.87846	(∑ odd C27-C33)/ (∑ even C26-C32)
Trigui et al., 2019	Sevkar	Armenia	45.1667	41	680-960	11	450-550					Fresh material	Fresh_leaves									aster	Soxhlet, DCM: MeOH			105	27	25-35	28.7858	∑Ci x i/ ∑Ci , i=27-33			6.46468	(∑ odd C27-C33)/ (∑ even C26-C32)
Trigui et al., 2019	Sevkar	Armenia	45.1667	41	680-960	11	450-550					Fresh material	Fresh_leaves									hypericum	Soxhlet, DCM: MeOH			109.145	29	25-33	29.1512	∑Ci x i/ ∑Ci , i=27-33			16.5903	(∑ odd C27-C33)/ (∑ even C26-C32)
Trigui et al., 2019	Sevkar	Armenia	45.1667	41	680-960	11	450-550					Fresh material	Fresh_leaves									verbascum	Soxhlet, DCM: MeOH			259.85	31	25-33	30.0035	∑Ci x i/ ∑Ci , i=27-33			22.4894	(∑ odd C27-C33)/ (∑ even C26-C32)
Trigui et al., 2019	Aj	Armenia	45.1667	41	680-960	11	450-550					Fresh material	Fresh_leaves									Anthriscus	Soxhlet, DCM: MeOH			2096.69	29	25-35	29.9442	∑Ci x i/ ∑Ci , i=27-33			11.9066	(∑ odd C27-C33)/ (∑ even C26-C32)
Trigui et al., 2019	Aj	Armenia	45.1667	41	680-960	11	450-550					Fresh material	Fresh_leaves									Mentha	Soxhlet, DCM: MeOH			492.45	33	25-35	31.3064	∑Ci x i/ ∑Ci , i=27-33			9.31333	(∑ odd C27-C33)/ (∑ even C26-C32)
Trigui et al., 2019	Aj	Armenia	45.1667	41	680-960	11	450-550					Fresh material	Fresh_leaves									Thymus vulgaris	Soxhlet, DCM: MeOH			47.5629	29	25-35	29.2989	∑Ci x i/ ∑Ci , i=27-33			12.7507	(∑ odd C27-C33)/ (∑ even C26-C32)
Trigui et al., 2019	Aj	Armenia	45.1667	41	680-960	11	450-550					Fresh material	Fresh_leaves									corolorien	Soxhlet, DCM: MeOH			437.001	29	25-35	29.7948	∑Ci x i/ ∑Ci , i=27-33			23.4844	(∑ odd C27-C33)/ (∑ even C26-C32)
Trigui et al., 2019	Aj	Armenia	45.1667	41	680-960	11	450-550					Fresh material	Fresh_leaves									Matricaria	Soxhlet, DCM: MeOH			679.952	29	25-33	28.9447	∑Ci x i/ ∑Ci , i=27-33			15.9104	(∑ odd C27-C33)/ (∑ even C26-C32)
Trigui et al., 2019	Lestiver	Armenia	45.1667	41	680-960	11	450-550					Fresh material	Fresh_leaves									grossularia	Soxhlet, DCM: MeOH			746.3	31	25-35	30.3493	∑Ci x i/ ∑Ci , i=27-33			16.6932	(∑ odd C27-C33)/ (∑ even C26-C32)
Trigui et al., 2019	Lestiver	Armenia	45.1667	41	680-960	11	450-550					Fresh material	Fresh_leaves									companula	Soxhlet, DCM: MeOH			542.255	31	25-35	30.3205	∑Ci x i/ ∑Ci , i=27-33			17.1979	(∑ odd C27-C33)/ (∑ even C26-C32)
Trigui et al., 2019	Lestiver	Armenia	45.1667	41	680-960	11	450-550					Fresh material	Fresh_leaves									hibiscus	Soxhlet, DCM: MeOH			271.803	33	25-35	31.5449	∑Ci x i/ ∑Ci , i=27-33			17.913	(∑ odd C27-C33)/ (∑ even C26-C32)
Trigui et al., 2019	Kb	Armenia	45.1667	41	680-960	11	450-550					Fresh material	Fresh_leaves									chenopoduim	Soxhlet, DCM: MeOH			1369.25	31	25-35	30.6401	∑Ci x i/ ∑Ci , i=27-33			16.3365	(∑ odd C27-C33)/ (∑ even C26-C32)
Trigui et al., 2019	Arg step	Armenia	45.1667	41	680-960	11	450-550					Fresh material	Fresh_leaves									mentha	Soxhlet, DCM: MeOH			1788.74	33	25-35	31.2518	∑Ci x i/ ∑Ci , i=27-33			7.99601	(∑ odd C27-C33)/ (∑ even C26-C32)
Trigui et al., 2019	Arg step	Armenia	45.1667	41	680-960	11	450-550					Fresh material	Fresh_leaves									vicia	Soxhlet, DCM: MeOH			127.724	27	25-35	28.758	∑Ci x i/ ∑Ci , i=27-33			9.456	(∑ odd C27-C33)/ (∑ even C26-C32)
Trigui et al., 2019	Sevkar	Armenia	45.1667	41	680-960	11	450-550					Fresh material	Fresh_leaves									festuca Sev	Soxhlet, DCM: MeOH			29.3197	31	25-35	30.2971	∑Ci x i/ ∑Ci , i=27-33			8.2675	(∑ odd C27-C33)/ (∑ even C26-C32)
Trigui et al., 2019	Aj	Armenia	45.1667	41	680-960	11	450-550					Fresh material	Fresh_leaves									Medow grass / Pao	Soxhlet, DCM: MeOH			230.05	31	25-35	30.7746	∑Ci x i/ ∑Ci , i=27-33			17.4088	(∑ odd C27-C33)/ (∑ even C26-C32)
Trigui et al., 2019	Kb	Armenia	45.1667	41	680-960	11	450-550					Fresh material	Fresh_leaves									carex	Soxhlet, DCM: MeOH			975.629	29	25-35	29.2455	∑Ci x i/ ∑Ci , i=27-33			9.00613	(∑ odd C27-C33)/ (∑ even C26-C32)
Trigui et al., 2019	Arg step	Armenia	45.1667	41	680-960	11	450-550					Fresh material	Fresh_leaves									agropyron	Soxhlet, DCM: MeOH			1672.88	29	25-35	30.003	∑Ci x i/ ∑Ci , i=27-33			37.8591	(∑ odd C27-C33)/ (∑ even C26-C32)
Trigui et al., 2019	Aj	Armenia	45.1667	41	680-960	11	450-550		0	0.05			Topsoil										Soxhlet, DCM: MeOH			4.09685	31	25-35	30.3811	∑Ci x i/ ∑Ci , i=27-33			11.9955	(∑ odd C27-C33)/ (∑ even C26-C32)
Trigui et al., 2019	Arg	Armenia	45.1667	41	680-960	11	450-550		0	0.05			Topsoil										Soxhlet, DCM: MeOH			1.96693	31	25-35	29.7473	∑Ci x i/ ∑Ci , i=27-33			9.82463	(∑ odd C27-C33)/ (∑ even C26-C32)
Trigui et al., 2019	Sevkar	Armenia	45.1667	41	680-960	11	450-550		0	0.05			Topsoil										Soxhlet, DCM: MeOH			11.6576	31	25-34	29.8727	∑Ci x i/ ∑Ci , i=27-33			15.1733	(∑ odd C27-C33)/ (∑ even C26-C32)
Trigui et al., 2019	lestiver	Armenia	45.1667	41	680-960	11	450-550		0	0.05			Topsoil										Soxhlet, DCM: MeOH			7.73295	29	25-35	29.4867	∑Ci x i/ ∑Ci , i=27-33			8.01501	(∑ odd C27-C33)/ (∑ even C26-C32)
Trigui et al., 2019	Arg forest	Armenia	45.1667	41	680-960	11	450-550		0	0.05			Topsoil										Soxhlet, DCM: MeOH			5.16147	31	25-35	30.3242	∑Ci x i/ ∑Ci , i=27-33			10.7367	(∑ odd C27-C33)/ (∑ even C26-C32)
Trigui et al., 2019	Step forest	Armenia	45.1667	41	680-960	11	450-550		0	0.05			Topsoil										Soxhlet, DCM: MeOH			6.22265	29	25-35	29.6881	∑Ci x i/ ∑Ci , i=27-33			9.52746	(∑ odd C27-C33)/ (∑ even C26-C32)
Trigui et al., 2019	Sevkar	Armenia	45.1667	41	680-960	11	450-550					Litter	Litter										Soxhlet, DCM: MeOH			139.641	29	25-35	29.4662	∑Ci x i/ ∑Ci , i=27-33			15.2364	(∑ odd C27-C33)/ (∑ even C26-C32)
Trigui et al., 2019	lestiver	Armenia	45.1667	41	680-960	11	450-550				Of		Organic layer										Soxhlet, DCM: MeOH			51.6717	29	25-35	28.2628	∑Ci x i/ ∑Ci , i=27-33			8.96389	(∑ odd C27-C33)/ (∑ even C26-C32)
Trigui et al., 2019	lestiver	Armenia	45.1667	41	680-960	11	450-550					Litter	Litter										Soxhlet, DCM: MeOH			101.807	27	25-34	28.0664	∑Ci x i/ ∑Ci , i=27-33			12.3274	(∑ odd C27-C33)/ (∑ even C26-C32)
Trigui et al., 2019	Arg forest	Armenia	45.1667	41	680-960	11	450-550				Of		Organic layer										Soxhlet, DCM: MeOH			88.4584	29	25-35	29.1173	∑Ci x i/ ∑Ci , i=27-33			11.258	(∑ odd C27-C33)/ (∑ even C26-C32)
Trigui et al., 2019	Arg forest	Armenia	45.1667	41	680-960	11	450-550					Litter	Litter										Soxhlet, DCM: MeOH			353.206	29	25-35	28.5106	∑Ci x i/ ∑Ci , i=27-33			15.8713	(∑ odd C27-C33)/ (∑ even C26-C32)
Trigui et al., 2019	Step forest	Armenia	45.1667	41	680-960	11	450-550				Of		Organic layer										Soxhlet, DCM: MeOH			118.368	29	25-35	29.6806	∑Ci x i/ ∑Ci , i=27-33			18.0848	(∑ odd C27-C33)/ (∑ even C26-C32)
Trigui et al., 2019	Step forest	Armenia	45.1667	41	680-960	11	450-550					Litter	Litter										Soxhlet, DCM: MeOH			241.165	29	25-35	29.6408	∑Ci x i/ ∑Ci , i=27-33			14.6949	(∑ odd C27-C33)/ (∑ even C26-C32)
van der Voort et al., 2017	VdV_Lausanne				807	7.6	1134		0	0.05			Cambisol	4.6									Microwave, DCM:MeOH						27.3	Not provided	16.6	Not provided
van der Voort et al., 2017	VdV_Lausanne				807	7.6	1134		0.05	0.1			Cambisol	4.6									Microwave, DCM:MeOH						27.5	Not provided	12.7	Not provided
van der Voort et al., 2017	VdV_Lausanne				807	7.6	1134		0.1	0.2			Cambisol	4.6									Microwave, DCM:MeOH						27.9	Not provided	9	Not provided
van der Voort et al., 2017	VdV_Lausanne				807	7.6	1134		0.2	0.4			Cambisol	4.6									Microwave, DCM:MeOH						28.4	Not provided	5.7	Not provided
van der Voort et al., 2017	VdV_Lausanne				807	7.6	1134		0.4	0.6			Cambisol	4.6									Microwave, DCM:MeOH						28.8	Not provided		Not provided
van der Voort et al., 2017	VdV_Lausanne				807	7.6	1134		0.6	0.8			Cambisol	4.6									Microwave, DCM:MeOH						28.8	Not provided	2.9	Not provided
van der Voort et al., 2017	VdV_Lausanne				807	7.6	1134		0.8	1			Cambisol	4.6									Microwave, DCM:MeOH						29.6	Not provided		Not provided
van der Voort et al., 2017	VdV_Beatenberg				1511	4.7	1163		0	0.05			Podzol	4.1									Microwave, DCM:MeOH						29.6	Not provided	22.1	Not provided
van der Voort et al., 2017	VdV_Beatenberg				1511	4.7	1163		0.05	0.1			Podzol	4.1									Microwave, DCM:MeOH						29.5	Not provided	4.4	Not provided
van der Voort et al., 2017	VdV_Beatenberg				1511	4.7	1163		0.1	0.2			Podzol	4.1									Microwave, DCM:MeOH						29.5	Not provided	4.4	Not provided
van der Voort et al., 2017	VdV_Beatenberg				1511	4.7	1163		0.2	0.4			Podzol	4.1									Microwave, DCM:MeOH						29.5	Not provided	4.3	Not provided
Wu et al., 2019	WAY5	Peru	-71.588	-13.1926	3025	11.1						Top_litter	Umbrisol							46.7	Weinmannia crassifolia, Clusia alata cf., and Hesperomeles ferruginea		ASE, DCM:MeOH		4878	2279	29	23-33	29.4	∑Ci x i/ ∑Ci , i=23-33	14.7	2 (Cn ) / (Cn-1 + Cn+1 ), n=23-33
Wu et al., 2019	WAY5	Peru	-71.588	-13.1926	3025	11.1						Middle_litter	Umbrisol							44.9	Weinmannia crassifolia, Clusia alata cf., and Hesperomeles ferruginea		ASE, DCM:MeOH		2349	1055	29	23-33	28.9	∑Ci x i/ ∑Ci , i=23-33	8.4	2 (Cn ) / (Cn-1 + Cn+1 ), n=23-33
Wu et al., 2019	WAY5	Peru	-71.588	-13.1926	3025	11.1						Bottom_litter	Umbrisol							44.1	Weinmannia crassifolia, Clusia alata cf., and Hesperomeles ferruginea		ASE, DCM:MeOH		680	300	29	23-33	29	∑Ci x i/ ∑Ci , i=23-33	11.5	2 (Cn ) / (Cn-1 + Cn+1 ), n=23-33
Wu et al., 2019	WAY5	Peru	-71.588	-13.1926	3025	11.1			0.05	0.2		Soil	Umbrisol							19.8	Weinmannia crassifolia, Clusia alata cf., and Hesperomeles ferruginea		ASE, DCM:MeOH		578	115	29	23-33	29.1	∑Ci x i/ ∑Ci , i=23-33	8.3	2 (Cn ) / (Cn-1 + Cn+1 ), n=23-33
Wu et al., 2019	WAY5	Peru	-71.588	-13.1926	3025	11.1			0.25	0.4		Soil	Umbrisol							11.7	Weinmannia crassifolia, Clusia alata cf., and Hesperomeles ferruginea		ASE, DCM:MeOH		156	18	29	23-33	28.8	∑Ci x i/ ∑Ci , i=23-33	5.7	2 (Cn ) / (Cn-1 + Cn+1 ), n=23-33
Wu et al., 2019	WAY5	Peru	-71.588	-13.1926	3025	11.1			0.5	0.7		Soil	Umbrisol							6.2	Weinmannia crassifolia, Clusia alata cf., and Hesperomeles ferruginea		ASE, DCM:MeOH		258	16	29	23-33	28.7	∑Ci x i/ ∑Ci , i=23-33	6.1	2 (Cn ) / (Cn-1 + Cn+1 ), n=23-33
Wu et al., 2019	WAY5	Peru	-71.588	-13.1926	3025	11.1			0.7	0.9		Soil	Umbrisol							2	Weinmannia crassifolia, Clusia alata cf., and Hesperomeles ferruginea		ASE, DCM:MeOH		104	2.1	29	23-33	28.5	∑Ci x i/ ∑Ci , i=23-33	5.6	2 (Cn ) / (Cn-1 + Cn+1 ), n=23-33
Wu et al., 2019	Wu_SP	Peru	-71.537	-13.049	1500	18.8						Large_litter	Cambisol							42.9	Alchornea latifolia, Tachigali setifera, and Tapirira obtuse		ASE, DCM:MeOH		1082	464	29	23-33	29.2	∑Ci x i/ ∑Ci , i=23-33	10.8	2 (Cn ) / (Cn-1 + Cn+1 ), n=23-33
Wu et al., 2019	Wu_SP	Peru	-71.537	-13.049	1500	18.8						Litter_debris	Cambisol							42	Alchornea latifolia, Tachigali setifera, and Tapirira obtuse		ASE, DCM:MeOH		248	104	29	23-33	29.4	∑Ci x i/ ∑Ci , i=23-33	6.6	2 (Cn ) / (Cn-1 + Cn+1 ), n=23-33
Wu et al., 2019	Wu_SP	Peru	-71.537	-13.049	1500	18.8						Root	Cambisol							40.8	Alchornea latifolia, Tachigali setifera, and Tapirira obtuse		ASE, DCM:MeOH		1	0.6	29	29-31	29	∑Ci x i/ ∑Ci , i=23-33	4.1	2 (Cn ) / (Cn-1 + Cn+1 ), n=23-33
Wu et al., 2019	Wu_SP	Peru	-71.537	-13.049	1500	18.8			0	0.1		Soil	Cambisol							9.3	Alchornea latifolia, Tachigali setifera, and Tapirira obtuse		ASE, DCM:MeOH		248	23	29	23-33	29.5	∑Ci x i/ ∑Ci , i=23-33	6.1	2 (Cn ) / (Cn-1 + Cn+1 ), n=23-33
Wu et al., 2019	Wu_SP	Peru	-71.537	-13.049	1500	18.8			0.1	0.2		Soil	Cambisol							5.5	Alchornea latifolia, Tachigali setifera, and Tapirira obtuse		ASE, DCM:MeOH		195	11	29	23-33	29.5	∑Ci x i/ ∑Ci , i=23-33	5.6	2 (Cn ) / (Cn-1 + Cn+1 ), n=23-33
Wu et al., 2019	Wu_SP	Peru	-71.537	-13.049	1500	18.8			0.2	0.4		Soil	Cambisol							1.7	Alchornea latifolia, Tachigali setifera, and Tapirira obtuse		ASE, DCM:MeOH		167	2.8	29	25-33	29.5	∑Ci x i/ ∑Ci , i=23-33	5	2 (Cn ) / (Cn-1 + Cn+1 ), n=23-33
Wu et al., 2019	Wu_VC3	Peru	-71.4183	-12.8961	614	22.9			0	0.1		Soil	NA							3.6	Bamboo		ASE, DCM:MeOH		128	4.6	31	23-33	29.1	∑Ci x i/ ∑Ci , i=23-33	5.7	2 (Cn ) / (Cn-1 + Cn+1 ), n=23-33
Wu et al., 2019	Wu_VC3	Peru	-71.4183	-12.8961	614	22.9			0.1	0.3		Soil	NA							1.6	Bamboo		ASE, DCM:MeOH		139	2.3	29	23-33	28.8	∑Ci x i/ ∑Ci , i=23-33	5	2 (Cn ) / (Cn-1 + Cn+1 ), n=23-33
Wu et al., 2019	Wu_VC3	Peru	-71.4183	-12.8961	614	22.9			0.3	0.5		Soil	NA							1.4	Bamboo		ASE, DCM:MeOH		206	2.8	29, 31	23-33	28.9	∑Ci x i/ ∑Ci , i=23-33	4.4	2 (Cn ) / (Cn-1 + Cn+1 ), n=23-33
Wu et al., 2019	Wu_VC3	Peru	-71.4183	-12.8961	614	22.9			0.5	0.63		Soil	NA							0.7	Bamboo		ASE, DCM:MeOH		217	1.5	31	25-33	28.9	∑Ci x i/ ∑Ci , i=23-33	4.8	2 (Cn ) / (Cn-1 + Cn+1 ), n=23-33
Wu et al., 2019	Wu_VC2	Peru	-71.4183	-12.8961	614	22.9						Litter	NA							35.6	Bamboo		ASE, DCM:MeOH		488	174	29	23-33	29.9	∑Ci x i/ ∑Ci , i=23-33	10.5	2 (Cn ) / (Cn-1 + Cn+1 ), n=23-33
Wu et al., 2019	Wu_VC2	Peru	-71.4183	-12.8961	614	22.9			0	0.1		Soil	NA							1.8	Bamboo		ASE, DCM:MeOH		144	2.6	29	23-33	29.1	∑Ci x i/ ∑Ci , i=23-33	4.5	2 (Cn ) / (Cn-1 + Cn+1 ), n=23-33
Wu et al., 2019	Wu_VC2	Peru	-71.4183	-12.8961	614	22.9			0.2	0.35		Soil	NA							1.6	Bamboo		ASE, DCM:MeOH		73	1.2	29	25-33	28.6	∑Ci x i/ ∑Ci , i=23-33	4	2 (Cn ) / (Cn-1 + Cn+1 ), n=23-33
Wu et al., 2019	Wu_VC2	Peru	-71.4183	-12.8961	614	22.9			0.6	1		Soil	NA							0.6	Bamboo		ASE, DCM:MeOH		64	0.4	27, 29, 31	27-31	28.7	∑Ci x i/ ∑Ci , i=23-33	3.3	2 (Cn ) / (Cn-1 + Cn+1 ), n=23-33
Wu et al., 2019	Wu_LA4	Peru	-70.0993	-12.5588	286	24.4						Litter	Ultisol							44.7	Inga		ASE, DCM:MeOH		2060	920	31	23-33	30.3	∑Ci x i/ ∑Ci , i=23-33	16.1	2 (Cn ) / (Cn-1 + Cn+1 ), n=23-33
Wu et al., 2019	Wu_LA4	Peru	-70.0993	-12.5588	286	24.4						Root	Ultisol							36.7	Inga		ASE, DCM:MeOH		14	5.1	23	23-33	27.2	∑Ci x i/ ∑Ci , i=23-33	7.1	2 (Cn ) / (Cn-1 + Cn+1 ), n=23-33
Wu et al., 2019	Wu_LA4	Peru	-70.0993	-12.5588	286	24.4			0	0.07		Soil	Ultisol							0.5	Inga		ASE, DCM:MeOH		295	1.6	31	23-33	30	∑Ci x i/ ∑Ci , i=23-33	6.7	2 (Cn ) / (Cn-1 + Cn+1 ), n=23-33
Wu et al., 2019	Wu_LA4	Peru	-70.0993	-12.5588	286	24.4			0.07	0.2		Soil	Ultisol							0.4	Inga		ASE, DCM:MeOH		197	0.8	31	29-33	29.9	∑Ci x i/ ∑Ci , i=23-33	5.7	2 (Cn ) / (Cn-1 + Cn+1 ), n=23-33
Wu et al., 2019	Wu_LA4	Peru	-70.0993	-12.5588	286	24.4			0.4	0.9		Soil	Ultisol							0.2	Inga		ASE, DCM:MeOH		58	0.1			29.9	∑Ci x i/ ∑Ci , i=23-33	5	2 (Cn ) / (Cn-1 + Cn+1 ), n=23-33
Wu et al., 2019	Wu_LA5	Peru	-70.0993	-12.5588	286	24.4			0	0.05		Soil	Ultisol							1.2	Inga		ASE, DCM:MeOH		303	3.5	33	23-33	29.9	∑Ci x i/ ∑Ci , i=23-33	4.6	2 (Cn ) / (Cn-1 + Cn+1 ), n=23-33
Wu et al., 2019	Wu_LA5	Peru	-70.0993	-12.5588	286	24.4			0.1	0.3		Soil	Ultisol								Inga		ASE, DCM:MeOH			0.2	29, 31	29-31
Wu et al., 2019	Wu_LA5	Peru	-70.0993	-12.5588	286	24.4			0.4	0.6		Soil	Ultisol							0.2	Inga		ASE, DCM:MeOH		27	0.05
Wu et al., 2019	Wu_LA5	Peru	-70.0993	-12.5588	286	24.4			1	1.5		Soil	Ultisol							0.1	Inga		ASE, DCM:MeOH		56	0.1
Xie et al., 2004		Bolton Fell Moss, Cumbria							0	0.01													Soxhlet, DCM: Acetone				31	21-33			17.5	Not provided
Xie et al., 2004		Bolton Fell Moss, Cumbria							0.02	0.03													Soxhlet, DCM: Acetone				31	21-33			14.1	Not provided
Xie et al., 2004		Bolton Fell Moss, Cumbria							0.04	0.05													Soxhlet, DCM: Acetone				31	21-33			14.6	Not provided
Xie et al., 2004		Bolton Fell Moss, Cumbria							0.06	0.07													Soxhlet, DCM: Acetone				31	21-33			12.3	Not provided
Xie et al., 2004		Bolton Fell Moss, Cumbria							0.08	0.09													Soxhlet, DCM: Acetone				31	21-33			12	Not provided
Xie et al., 2004		Bolton Fell Moss, Cumbria							0.1	0.11													Soxhlet, DCM: Acetone				31	21-33			14.7	Not provided
Xie et al., 2004		Bolton Fell Moss, Cumbria							0.13	0.14													Soxhlet, DCM: Acetone				31	21-33			9.7	Not provided
Xie et al., 2004		Bolton Fell Moss, Cumbria							0.15	0.16													Soxhlet, DCM: Acetone				23	21-33			12	Not provided
Xie et al., 2004		Bolton Fell Moss, Cumbria							0.16	0.17													Soxhlet, DCM: Acetone				23	21-33			13.3	Not provided
Xie et al., 2004		Bolton Fell Moss, Cumbria							0.17	0.18													Soxhlet, DCM: Acetone				23	21-33			14.1	Not provided
Xie et al., 2004		Bolton Fell Moss, Cumbria							0.18	0.19													Soxhlet, DCM: Acetone				23	21-33			18.5	Not provided
Xie et al., 2004		Bolton Fell Moss, Cumbria							0.19	0.2													Soxhlet, DCM: Acetone				23, 31	21-33			16.6	Not provided
Xie et al., 2004		Bolton Fell Moss, Cumbria							0.21	0.22													Soxhlet, DCM: Acetone				31	21-33			14.2	Not provided
Xie et al., 2004		Bolton Fell Moss, Cumbria							0.23	0.24													Soxhlet, DCM: Acetone				31	21-33			14.7	Not provided
Xie et al., 2004		Bolton Fell Moss, Cumbria							0.25	0.26													Soxhlet, DCM: Acetone				31	21-33			12.9	Not provided
Xie et al., 2004		Bolton Fell Moss, Cumbria							0.27	0.28													Soxhlet, DCM: Acetone				31	21-33			10.8	Not provided
Xie et al., 2004		Bolton Fell Moss, Cumbria							0.3	0.31													Soxhlet, DCM: Acetone				31	21-33			13.1	Not provided
Xie et al., 2004		Bolton Fell Moss, Cumbria							0.32	0.33													Soxhlet, DCM: Acetone				31	21-33			11.8	Not provided
Xie et al., 2004		Bolton Fell Moss, Cumbria							0.34	0.35													Soxhlet, DCM: Acetone				31	21-33			14.1	Not provided
Xie et al., 2004		Bolton Fell Moss, Cumbria							0.36	0.37													Soxhlet, DCM: Acetone				31	21-33			14.3	Not provided
Xie et al., 2004		Bolton Fell Moss, Cumbria							0.39	0.4													Soxhlet, DCM: Acetone				31	21-33			16	Not provided
Yao et al., 2019		Mountain Laji	36	101	4200	7.2	254		0.1	0	0.2							12.1956		6.29137	Potentilla fruticosa, Stipa purpurea, Carex dispalata, Kobresia pygmaea, Kobresia humilis, Elymus nutans, polygonum vivparum, Polygonum sibiricum, Festuca ovina, Caragana sinica, Taraxacum mongolicum, Leontopodium nanum, and Poa pratensis.		Soxhlet, DCM: MeOH			34.8966	31	20-35	29.226	∑Ci x i/ ∑Ci
Yao et al., 2019		Mountain Laji	36	101	4200	7.2	254		0.1	0	0.2							13.2037		6.81141	Potentilla fruticosa, Stipa purpurea, Carex dispalata, Kobresia pygmaea, Kobresia humilis, Elymus nutans, polygonum vivparum, Polygonum sibiricum, Festuca ovina, Caragana sinica, Taraxacum mongolicum, Leontopodium nanum, and Poa pratensis.		Soxhlet, DCM: MeOH			47.3382	31	20-35	29.3598	∑Ci x i/ ∑Ci
Yao et al., 2019		Mountain Laji	36	101	4200	7.2	254		0.1	0	0.2							12.3989		7.8252	Potentilla fruticosa, Stipa purpurea, Carex dispalata, Kobresia pygmaea, Kobresia humilis, Elymus nutans, polygonum vivparum, Polygonum sibiricum, Festuca ovina, Caragana sinica, Taraxacum mongolicum, Leontopodium nanum, and Poa pratensis.		Soxhlet, DCM: MeOH			34.7149	31	20-35	28.9458	∑Ci x i/ ∑Ci
Yao et al., 2019		Mountain Laji	36	101	3816	7.2	254		0.1	0	0.2							12.9998		6.6468	Potentilla fruticosa, Stipa purpurea, Carex dispalata, Kobresia pygmaea, Kobresia humilis, Elymus nutans, polygonum vivparum, Polygonum sibiricum, Festuca ovina, Caragana sinica, Taraxacum mongolicum, Leontopodium nanum, and Poa pratensis.		Soxhlet, DCM: MeOH			75.8606	31	20-35	27.7279	∑Ci x i/ ∑Ci
Yao et al., 2019		Mountain Laji	36	101	3816	7.2	254		0.1	0	0.2							11.2115		5.04537	Potentilla fruticosa, Stipa purpurea, Carex dispalata, Kobresia pygmaea, Kobresia humilis, Elymus nutans, polygonum vivparum, Polygonum sibiricum, Festuca ovina, Caragana sinica, Taraxacum mongolicum, Leontopodium nanum, and Poa pratensis.		Soxhlet, DCM: MeOH			93.7526	31	20-35	27.369	∑Ci x i/ ∑Ci
Yao et al., 2019		Mountain Laji	36	101	3816	7.2	254		0.1	0	0.2							14.8479		7.8226	Potentilla fruticosa, Stipa purpurea, Carex dispalata, Kobresia pygmaea, Kobresia humilis, Elymus nutans, polygonum vivparum, Polygonum sibiricum, Festuca ovina, Caragana sinica, Taraxacum mongolicum, Leontopodium nanum, and Poa pratensis.		Soxhlet, DCM: MeOH			97.5786	31	20-35	27.051	∑Ci x i/ ∑Ci
Yao et al., 2019		Mountain Laji	36	101	3816	7.2	254		0.1	0	0.2							12.6966		7.07242	Potentilla fruticosa, Stipa purpurea, Carex dispalata, Kobresia pygmaea, Kobresia humilis, Elymus nutans, polygonum vivparum, Polygonum sibiricum, Festuca ovina, Caragana sinica, Taraxacum mongolicum, Leontopodium nanum, and Poa pratensis.		Soxhlet, DCM: MeOH			89.9267	31	20-35	27.2521	∑Ci x i/ ∑Ci
Yao et al., 2019		Mountain Laji	36	101	3426	7.2	254		0.1	0	0.2							11.428		5.08007	Potentilla fruticosa, Stipa purpurea, Carex dispalata, Kobresia pygmaea, Kobresia humilis, Elymus nutans, polygonum vivparum, Polygonum sibiricum, Festuca ovina, Caragana sinica, Taraxacum mongolicum, Leontopodium nanum, and Poa pratensis.		Soxhlet, DCM: MeOH			79.8975	31	20-35	26.6394	∑Ci x i/ ∑Ci
Yao et al., 2019		Mountain Laji	36	101	3426	7.2	254		0.1	0	0.2							15.8122		6.29137	Potentilla fruticosa, Stipa purpurea, Carex dispalata, Kobresia pygmaea, Kobresia humilis, Elymus nutans, polygonum vivparum, Polygonum sibiricum, Festuca ovina, Caragana sinica, Taraxacum mongolicum, Leontopodium nanum, and Poa pratensis.		Soxhlet, DCM: MeOH			41.6457	31	20-35	27.9415	∑Ci x i/ ∑Ci
Yao et al., 2019		Mountain Laji	36	101	3426	7.2	254		0.1	0	0.2							13.8452		5.76709	Potentilla fruticosa, Stipa purpurea, Carex dispalata, Kobresia pygmaea, Kobresia humilis, Elymus nutans, polygonum vivparum, Polygonum sibiricum, Festuca ovina, Caragana sinica, Taraxacum mongolicum, Leontopodium nanum, and Poa pratensis.		Soxhlet, DCM: MeOH			106.781	31	20-35	27.9619	∑Ci x i/ ∑Ci
Yao et al., 2019		Mountain Laji	36	101	3426	7.2	254		0.1	0	0.2							14.0998		5.61003	Potentilla fruticosa, Stipa purpurea, Carex dispalata, Kobresia pygmaea, Kobresia humilis, Elymus nutans, polygonum vivparum, Polygonum sibiricum, Festuca ovina, Caragana sinica, Taraxacum mongolicum, Leontopodium nanum, and Poa pratensis.		Soxhlet, DCM: MeOH			94.2187	31	20-35	27.2233	∑Ci x i/ ∑Ci
Yao et al., 2019		Mountain Laji	36	101	3031	7.2	254		0.1	0	0.2							12.5793		1.20811	Potentilla fruticosa, Stipa purpurea, Carex dispalata, Kobresia pygmaea, Kobresia humilis, Elymus nutans, polygonum vivparum, Polygonum sibiricum, Festuca ovina, Caragana sinica, Taraxacum mongolicum, Leontopodium nanum, and Poa pratensis.		Soxhlet, DCM: MeOH			28.6803	31	20-35	27.2882	∑Ci x i/ ∑Ci
Yao et al., 2019		Mountain Laji	36	101	3031	7.2	254		0.1	0	0.2							12.3164		1.45662	Potentilla fruticosa, Stipa purpurea, Carex dispalata, Kobresia pygmaea, Kobresia humilis, Elymus nutans, polygonum vivparum, Polygonum sibiricum, Festuca ovina, Caragana sinica, Taraxacum mongolicum, Leontopodium nanum, and Poa pratensis.		Soxhlet, DCM: MeOH			32.6813	31	20-35	27.8279	∑Ci x i/ ∑Ci
Yao et al., 2019		Mountain Laji	36	101	3031	7.2	254		0.1	0	0.2							18.9911		2.03235	Potentilla fruticosa, Stipa purpurea, Carex dispalata, Kobresia pygmaea, Kobresia humilis, Elymus nutans, polygonum vivparum, Polygonum sibiricum, Festuca ovina, Caragana sinica, Taraxacum mongolicum, Leontopodium nanum, and Poa pratensis.		Soxhlet, DCM: MeOH			21.9547	31	20-35	28.0511	∑Ci x i/ ∑Ci
Yao et al., 2019		Mountain Laji	36	101	3031	7.2	254		0.1	0	0.2							15.4393		1.52092	Potentilla fruticosa, Stipa purpurea, Carex dispalata, Kobresia pygmaea, Kobresia humilis, Elymus nutans, polygonum vivparum, Polygonum sibiricum, Festuca ovina, Caragana sinica, Taraxacum mongolicum, Leontopodium nanum, and Poa pratensis.		Soxhlet, DCM: MeOH			28.0159	31	20-35	26.3524	∑Ci x i/ ∑Ci
Yao et al., 2019		Mountain Laji	36	101	2717	7.2	254		0.1	0	0.2							8.99788		0.641945	Potentilla fruticosa, Stipa purpurea, Carex dispalata, Kobresia pygmaea, Kobresia humilis, Elymus nutans, polygonum vivparum, Polygonum sibiricum, Festuca ovina, Caragana sinica, Taraxacum mongolicum, Leontopodium nanum, and Poa pratensis.		Soxhlet, DCM: MeOH				31	20-35		∑Ci x i/ ∑Ci
Yao et al., 2019		Mountain Laji	36	101	2717	7.2	254		0.1	0	0.2							8.30261		0.622718	Potentilla fruticosa, Stipa purpurea, Carex dispalata, Kobresia pygmaea, Kobresia humilis, Elymus nutans, polygonum vivparum, Polygonum sibiricum, Festuca ovina, Caragana sinica, Taraxacum mongolicum, Leontopodium nanum, and Poa pratensis.		Soxhlet, DCM: MeOH			61.9501	31	20-35	27.6758	∑Ci x i/ ∑Ci
Yao et al., 2019		Mountain Laji	36	101	2717	7.2	254		0.1	0	0.2							10.6999		0.704655	Potentilla fruticosa, Stipa purpurea, Carex dispalata, Kobresia pygmaea, Kobresia humilis, Elymus nutans, polygonum vivparum, Polygonum sibiricum, Festuca ovina, Caragana sinica, Taraxacum mongolicum, Leontopodium nanum, and Poa pratensis.		Soxhlet, DCM: MeOH			59.2987	31	20-35	28.7633	∑Ci x i/ ∑Ci
Yao et al., 2019		Mountain Laji	36	101	2717	7.2	254		0.1	0	0.2							7.45946		0.655	Potentilla fruticosa, Stipa purpurea, Carex dispalata, Kobresia pygmaea, Kobresia humilis, Elymus nutans, polygonum vivparum, Polygonum sibiricum, Festuca ovina, Caragana sinica, Taraxacum mongolicum, Leontopodium nanum, and Poa pratensis.		Soxhlet, DCM: MeOH			59.9789	31	20-35	28.2335	∑Ci x i/ ∑Ci
Yao et al., 2019		Mountain Laji	36	101	4200	7.2	254					Fresh material										Kobresia humilis	Soxhlet, DCM: MeOH			0.231911	31	26-33	29.9857	∑Ci x i/ ∑Ci
Yao et al., 2019		Mountain Laji	36	101	4200	7.2	254					Fresh material										Kobresia humilis	Soxhlet, DCM: MeOH			0.297537	31	26-33	29.8843	∑Ci x i/ ∑Ci
Yao et al., 2019		Mountain Laji	36	101	4200	7.2	254					Fresh material										Kobresia humilis	Soxhlet, DCM: MeOH			0.209525	31	26-33	29.9825	∑Ci x i/ ∑Ci
Yao et al., 2019		Mountain Laji	36	101	4200	7.2	254					Fresh material										Kobresia humilis	Soxhlet, DCM: MeOH			0.324791	31	26-33	29.8273	∑Ci x i/ ∑Ci
Yao et al., 2019		Mountain Laji	36	101	3816	7.2	254					Fresh material										Kobresia humilis	Soxhlet, DCM: MeOH				29	26-33	28.758	∑Ci x i/ ∑Ci
Yao et al., 2019		Mountain Laji	36	101	3816	7.2	254					Fresh material										Kobresia humilis	Soxhlet, DCM: MeOH			0.215291	29	26-33	28.5585	∑Ci x i/ ∑Ci
Yao et al., 2019		Mountain Laji	36	101	3816	7.2	254					Fresh material										Kobresia humilis	Soxhlet, DCM: MeOH			0.162601	29	26-33	28.6807	∑Ci x i/ ∑Ci
Yao et al., 2019		Mountain Laji	36	101	3816	7.2	254					Fresh material										Kobresia humilis	Soxhlet, DCM: MeOH			0.210169	29	26-33	28.8807	∑Ci x i/ ∑Ci
Yao et al., 2019		Mountain Laji	36	101	3426	7.2	254					Fresh material										Kobresia humilis	Soxhlet, DCM: MeOH			0.108319	29	26-33	29.4631	∑Ci x i/ ∑Ci
Yao et al., 2019		Mountain Laji	36	101	3426	7.2	254					Fresh material										Kobresia humilis	Soxhlet, DCM: MeOH			0.141148	29	26-33	29.2681	∑Ci x i/ ∑Ci
Yao et al., 2019		Mountain Laji	36	101	3426	7.2	254					Fresh material										Kobresia humilis	Soxhlet, DCM: MeOH			0.12516	29	26-33	28.7793	∑Ci x i/ ∑Ci
Yao et al., 2019		Mountain Laji	36	101	3426	7.2	254					Fresh material										Kobresia humilis	Soxhlet, DCM: MeOH			0.124875	29	26-33	29.1702	∑Ci x i/ ∑Ci
Yao et al., 2019		Mountain Laji	36	101	3031	7.2	254					Fresh material										Kobresia humilis	Soxhlet, DCM: MeOH			0.206998	27	26-33	29.1504	∑Ci x i/ ∑Ci
Yao et al., 2019		Mountain Laji	36	101	3031	7.2	254					Fresh material										Kobresia humilis	Soxhlet, DCM: MeOH			0.318113	27	26-33	29.255	∑Ci x i/ ∑Ci
Yao et al., 2019		Mountain Laji	36	101	3031	7.2	254					Fresh material										Kobresia humilis	Soxhlet, DCM: MeOH			0.225029	27	26-33	28.8762	∑Ci x i/ ∑Ci
Yao et al., 2019		Mountain Laji	36	101	3031	7.2	254					Fresh material										Kobresia humilis	Soxhlet, DCM: MeOH			0.250047	27	26-33	29.1209	∑Ci x i/ ∑Ci
Yao et al., 2019		Mountain Laji	36	101	2717	7.2	254					Fresh material										Kobresia humilis	Soxhlet, DCM: MeOH			0.205302	29	26-33	29.1916	∑Ci x i/ ∑Ci
Yao et al., 2019		Mountain Laji	36	101	2717	7.2	254					Fresh material										Kobresia humilis	Soxhlet, DCM: MeOH			0.234735	29	26-33	29.3099	∑Ci x i/ ∑Ci
Yao et al., 2019		Mountain Laji	36	101	2717	7.2	254					Fresh material										Kobresia humilis	Soxhlet, DCM: MeOH			0.182608	29	26-33	28.7739	∑Ci x i/ ∑Ci
Yao et al., 2019		Mountain Laji	36	101	2717	7.2	254					Fresh material										Kobresia humilis	Soxhlet, DCM: MeOH			0.131517	29	26-33	29.2276	∑Ci x i/ ∑Ci
Yao et al., 2019		Mountain Anizhihai	35	101	4157	7.2	254		0.1	0	0.2							9.34957		5.55436	Potentilla fruticosa, Stipa purpurea, Carex dispalata, Kobresia pygmaea, Kobresia humilis, Elymus nutans, polygonum vivparum, Polygonum sibiricum, Festuca ovina, Caragana sinica, Taraxacum mongolicum, Leontopodium nanum, and Poa pratensis.		Soxhlet, DCM: MeOH			1699.44	31	20-35	29.0063	∑Ci x i/ ∑Ci
Yao et al., 2019		Mountain Anizhihai	35	101	4157	7.2	254		0.1	0	0.2							9.48963		5.65058	Potentilla fruticosa, Stipa purpurea, Carex dispalata, Kobresia pygmaea, Kobresia humilis, Elymus nutans, polygonum vivparum, Polygonum sibiricum, Festuca ovina, Caragana sinica, Taraxacum mongolicum, Leontopodium nanum, and Poa pratensis.		Soxhlet, DCM: MeOH			1128.46	31	20-35	28.7317	∑Ci x i/ ∑Ci
Yao et al., 2019		Mountain Anizhihai	35	101	4157	7.2	254		0.1	0	0.2							12.6744		7.30352	Potentilla fruticosa, Stipa purpurea, Carex dispalata, Kobresia pygmaea, Kobresia humilis, Elymus nutans, polygonum vivparum, Polygonum sibiricum, Festuca ovina, Caragana sinica, Taraxacum mongolicum, Leontopodium nanum, and Poa pratensis.		Soxhlet, DCM: MeOH			1885.38	31	20-35	27.5571	∑Ci x i/ ∑Ci
Yao et al., 2019		Mountain Anizhihai	35	101	4157	7.2	254		0.1	0	0.2							12.8349		7.83625	Potentilla fruticosa, Stipa purpurea, Carex dispalata, Kobresia pygmaea, Kobresia humilis, Elymus nutans, polygonum vivparum, Polygonum sibiricum, Festuca ovina, Caragana sinica, Taraxacum mongolicum, Leontopodium nanum, and Poa pratensis.		Soxhlet, DCM: MeOH			1364.51	31	20-35	27.3274	∑Ci x i/ ∑Ci
Yao et al., 2019		Mountain Anizhihai	35	101	3827	7.2	254		0.1	0	0.2							12.7223		9.705	Potentilla fruticosa, Stipa purpurea, Carex dispalata, Kobresia pygmaea, Kobresia humilis, Elymus nutans, polygonum vivparum, Polygonum sibiricum, Festuca ovina, Caragana sinica, Taraxacum mongolicum, Leontopodium nanum, and Poa pratensis.		Soxhlet, DCM: MeOH				31	20-35	28.9965	∑Ci x i/ ∑Ci
Yao et al., 2019		Mountain Anizhihai	35	101	3827	7.2	254		0.1	0	0.2							11.7272		8.17359	Potentilla fruticosa, Stipa purpurea, Carex dispalata, Kobresia pygmaea, Kobresia humilis, Elymus nutans, polygonum vivparum, Polygonum sibiricum, Festuca ovina, Caragana sinica, Taraxacum mongolicum, Leontopodium nanum, and Poa pratensis.		Soxhlet, DCM: MeOH			91.0525	31	20-35	28.9866	∑Ci x i/ ∑Ci
Yao et al., 2019		Mountain Anizhihai	35	101	3827	7.2	254		0.1	0	0.2							12.3049		9.58919	Potentilla fruticosa, Stipa purpurea, Carex dispalata, Kobresia pygmaea, Kobresia humilis, Elymus nutans, polygonum vivparum, Polygonum sibiricum, Festuca ovina, Caragana sinica, Taraxacum mongolicum, Leontopodium nanum, and Poa pratensis.		Soxhlet, DCM: MeOH			104.531	31	20-35	29.1705	∑Ci x i/ ∑Ci
Yao et al., 2019		Mountain Anizhihai	35	101	3827	7.2	254		0.1	0	0.2							13.3652		8.94846	Potentilla fruticosa, Stipa purpurea, Carex dispalata, Kobresia pygmaea, Kobresia humilis, Elymus nutans, polygonum vivparum, Polygonum sibiricum, Festuca ovina, Caragana sinica, Taraxacum mongolicum, Leontopodium nanum, and Poa pratensis.		Soxhlet, DCM: MeOH			143.601	31	20-35	28.8323	∑Ci x i/ ∑Ci
Yao et al., 2019		Mountain Anizhihai	35	101	3384	7.2	254		0.1	0	0.2							14.5223		7.45179	Potentilla fruticosa, Stipa purpurea, Carex dispalata, Kobresia pygmaea, Kobresia humilis, Elymus nutans, polygonum vivparum, Polygonum sibiricum, Festuca ovina, Caragana sinica, Taraxacum mongolicum, Leontopodium nanum, and Poa pratensis.		Soxhlet, DCM: MeOH			29.4121	31	20-35	29.3635	∑Ci x i/ ∑Ci
Yao et al., 2019		Mountain Anizhihai	35	101	3384	7.2	254		0.1	0	0.2							20.5239		7.37759	Potentilla fruticosa, Stipa purpurea, Carex dispalata, Kobresia pygmaea, Kobresia humilis, Elymus nutans, polygonum vivparum, Polygonum sibiricum, Festuca ovina, Caragana sinica, Taraxacum mongolicum, Leontopodium nanum, and Poa pratensis.		Soxhlet, DCM: MeOH			32.457	31	20-35	29.8829	∑Ci x i/ ∑Ci
Yao et al., 2019		Mountain Anizhihai	35	101	3384	7.2	254		0.1	0	0.2							11.539		7.72579	Potentilla fruticosa, Stipa purpurea, Carex dispalata, Kobresia pygmaea, Kobresia humilis, Elymus nutans, polygonum vivparum, Polygonum sibiricum, Festuca ovina, Caragana sinica, Taraxacum mongolicum, Leontopodium nanum, and Poa pratensis.		Soxhlet, DCM: MeOH			34.975	31	20-35	29.6742	∑Ci x i/ ∑Ci
Yao et al., 2019		Mountain Anizhihai	35	101	3384	7.2	254		0.1	0	0.2							10.8025		7.05479	Potentilla fruticosa, Stipa purpurea, Carex dispalata, Kobresia pygmaea, Kobresia humilis, Elymus nutans, polygonum vivparum, Polygonum sibiricum, Festuca ovina, Caragana sinica, Taraxacum mongolicum, Leontopodium nanum, and Poa pratensis.		Soxhlet, DCM: MeOH			21.0103	31	20-35	28.003	∑Ci x i/ ∑Ci
Yao et al., 2019		Mountain Anizhihai	35	101	3022	7.2	254		0.1	0	0.2							11.7886		1.667	Potentilla fruticosa, Stipa purpurea, Carex dispalata, Kobresia pygmaea, Kobresia humilis, Elymus nutans, polygonum vivparum, Polygonum sibiricum, Festuca ovina, Caragana sinica, Taraxacum mongolicum, Leontopodium nanum, and Poa pratensis.		Soxhlet, DCM: MeOH			19.7951	31	20-35	28.1741	∑Ci x i/ ∑Ci
Yao et al., 2019		Mountain Anizhihai	35	101	3022	7.2	254		0.1	0	0.2							12.4806		1.81508	Potentilla fruticosa, Stipa purpurea, Carex dispalata, Kobresia pygmaea, Kobresia humilis, Elymus nutans, polygonum vivparum, Polygonum sibiricum, Festuca ovina, Caragana sinica, Taraxacum mongolicum, Leontopodium nanum, and Poa pratensis.		Soxhlet, DCM: MeOH			25.0424	31	20-35	26.8819	∑Ci x i/ ∑Ci
Yao et al., 2019		Mountain Anizhihai	35	101	3022	7.2	254		0.1	0	0.2							11.7635		1.50421	Potentilla fruticosa, Stipa purpurea, Carex dispalata, Kobresia pygmaea, Kobresia humilis, Elymus nutans, polygonum vivparum, Polygonum sibiricum, Festuca ovina, Caragana sinica, Taraxacum mongolicum, Leontopodium nanum, and Poa pratensis.		Soxhlet, DCM: MeOH			26.958	31	20-35	28.2325	∑Ci x i/ ∑Ci
Yao et al., 2019		Mountain Anizhihai	35	101	3022	7.2	254		0.1	0	0.2							11.1405		1.68132	Potentilla fruticosa, Stipa purpurea, Carex dispalata, Kobresia pygmaea, Kobresia humilis, Elymus nutans, polygonum vivparum, Polygonum sibiricum, Festuca ovina, Caragana sinica, Taraxacum mongolicum, Leontopodium nanum, and Poa pratensis.		Soxhlet, DCM: MeOH			20.6269	31	20-35	27.6604	∑Ci x i/ ∑Ci
Yao et al., 2019		Mountain Anizhihai	35	101	2622	7.2	254		0.1	0	0.2							18.7186		2.46546	Potentilla fruticosa, Stipa purpurea, Carex dispalata, Kobresia pygmaea, Kobresia humilis, Elymus nutans, polygonum vivparum, Polygonum sibiricum, Festuca ovina, Caragana sinica, Taraxacum mongolicum, Leontopodium nanum, and Poa pratensis.		Soxhlet, DCM: MeOH			42.1224	31	20-35	30.964	∑Ci x i/ ∑Ci
Yao et al., 2019		Mountain Anizhihai	35	101	2622	7.2	254		0.1	0	0.2							11.3982		2.17373	Potentilla fruticosa, Stipa purpurea, Carex dispalata, Kobresia pygmaea, Kobresia humilis, Elymus nutans, polygonum vivparum, Polygonum sibiricum, Festuca ovina, Caragana sinica, Taraxacum mongolicum, Leontopodium nanum, and Poa pratensis.		Soxhlet, DCM: MeOH			37.3617	31	20-35	29.1611	∑Ci x i/ ∑Ci
Yao et al., 2019		Mountain Anizhihai	35	101	2622	7.2	254		0.1	0	0.2							18.5775		2.34493	Potentilla fruticosa, Stipa purpurea, Carex dispalata, Kobresia pygmaea, Kobresia humilis, Elymus nutans, polygonum vivparum, Polygonum sibiricum, Festuca ovina, Caragana sinica, Taraxacum mongolicum, Leontopodium nanum, and Poa pratensis.		Soxhlet, DCM: MeOH			41.2262	31	20-35	29.2199	∑Ci x i/ ∑Ci
Yao et al., 2019		Mountain Anizhihai	35	101	2622	7.2	254		0.1	0	0.2							15.5669		2.328	Potentilla fruticosa, Stipa purpurea, Carex dispalata, Kobresia pygmaea, Kobresia humilis, Elymus nutans, polygonum vivparum, Polygonum sibiricum, Festuca ovina, Caragana sinica, Taraxacum mongolicum, Leontopodium nanum, and Poa pratensis.		Soxhlet, DCM: MeOH				31	20-35		∑Ci x i/ ∑Ci
Yao et al., 2019		Mountain Anizhihai	35	101	4157	7.2	254					Fresh material										Kobresia humilis	Soxhlet, DCM: MeOH			0.287864	29	26-33	31.3252	∑Ci x i/ ∑Ci
Yao et al., 2019		Mountain Anizhihai	35	101	4157	7.2	254					Fresh material										Kobresia humilis	Soxhlet, DCM: MeOH			0.307998	29	26-33	30.0064	∑Ci x i/ ∑Ci
Yao et al., 2019		Mountain Anizhihai	35	101	4157	7.2	254					Fresh material										Kobresia humilis	Soxhlet, DCM: MeOH			0.295664	29	26-33	29.6218	∑Ci x i/ ∑Ci
Yao et al., 2019		Mountain Anizhihai	35	101	4157	7.2	254					Fresh material										Kobresia humilis	Soxhlet, DCM: MeOH			0.345516	29	26-33	29.5074	∑Ci x i/ ∑Ci
Yao et al., 2019		Mountain Anizhihai	35	101	3827	7.2	254					Fresh material										Kobresia humilis	Soxhlet, DCM: MeOH			0.342166	29	26-33	29.9883	∑Ci x i/ ∑Ci
Yao et al., 2019		Mountain Anizhihai	35	101	3827	7.2	254					Fresh material										Kobresia humilis	Soxhlet, DCM: MeOH			0.426115	29	26-33	29.8733	∑Ci x i/ ∑Ci
Yao et al., 2019		Mountain Anizhihai	35	101	3827	7.2	254					Fresh material										Kobresia humilis	Soxhlet, DCM: MeOH			0.48116	29	26-33	29.5673	∑Ci x i/ ∑Ci
Yao et al., 2019		Mountain Anizhihai	35	101	3827	7.2	254					Fresh material										Kobresia humilis	Soxhlet, DCM: MeOH			0.259727	29	26-33	29.5002	∑Ci x i/ ∑Ci
Yao et al., 2019		Mountain Anizhihai	35	101	3384	7.2	254					Fresh material										Kobresia humilis	Soxhlet, DCM: MeOH			0.130847	29	26-33	29.1751	∑Ci x i/ ∑Ci
Yao et al., 2019		Mountain Anizhihai	35	101	3384	7.2	254					Fresh material										Kobresia humilis	Soxhlet, DCM: MeOH			0.163357	29	26-33	29.8583	∑Ci x i/ ∑Ci
Yao et al., 2019		Mountain Anizhihai	35	101	3384	7.2	254					Fresh material										Kobresia humilis	Soxhlet, DCM: MeOH			0.196982	29	26-33	29.8076	∑Ci x i/ ∑Ci
Yao et al., 2019		Mountain Anizhihai	35	101	3384	7.2	254					Fresh material										Kobresia humilis	Soxhlet, DCM: MeOH			0.162241	29	26-33	29.2931	∑Ci x i/ ∑Ci
Yao et al., 2019		Mountain Anizhihai	35	101	3022	7.2	254					Fresh material										Kobresia humilis	Soxhlet, DCM: MeOH			0.119282	29	26-33	28.9968	∑Ci x i/ ∑Ci
Yao et al., 2019		Mountain Anizhihai	35	101	3022	7.2	254					Fresh material										Kobresia humilis	Soxhlet, DCM: MeOH			0.181141	29	26-33	29.1886	∑Ci x i/ ∑Ci
Yao et al., 2019		Mountain Anizhihai	35	101	3022	7.2	254					Fresh material										Kobresia humilis	Soxhlet, DCM: MeOH			0.164539	29	26-33	29.15	∑Ci x i/ ∑Ci
Yao et al., 2019		Mountain Anizhihai	35	101	3022	7.2	254					Fresh material										Kobresia humilis	Soxhlet, DCM: MeOH			0.193193	29	26-33	29.1588	∑Ci x i/ ∑Ci
Yao et al., 2019		Mountain Anizhihai	35	101	2622	7.2	254					Fresh material										Kobresia humilis	Soxhlet, DCM: MeOH			0.361229	29	26-33	29.5529	∑Ci x i/ ∑Ci
Yao et al., 2019		Mountain Anizhihai	35	101	2622	7.2	254					Fresh material										Kobresia humilis	Soxhlet, DCM: MeOH			0.224838	29	26-33	29.6524	∑Ci x i/ ∑Ci
Yao et al., 2019		Mountain Anizhihai	35	101	2622	7.2	254					Fresh material										Kobresia humilis	Soxhlet, DCM: MeOH			0.131068	29	26-33	28.9648	∑Ci x i/ ∑Ci
Yao et al., 2019		Mountain Anizhihai	35	101	2622	7.2	254					Fresh material										Kobresia humilis	Soxhlet, DCM: MeOH				29	26-33	28.8967	∑Ci x i/ ∑Ci
Zhang et al., 2017	YC-1	China	48.5167	129.533	370			July				Fresh material										Sphagnum recurvum	Sonicated, CH2Cl:MeOH			72.7	23	21-33			14.8	1/2 ((∑odd C21-C31)/(∑even C22-C32) + (∑odd C23-C31)/(∑even C22-C32))
Zhang et al., 2017	YC-1	China	48.5167	129.533	370			July				Litter										Sphagnum palustre	Sonicated, CH2Cl:MeOH			39	29	21-33			9	1/2 ((∑odd C21-C31)/(∑even C22-C32) + (∑odd C23-C31)/(∑even C22-C32))
Zhang et al., 2017	YC-2	China	48.5167	129.533	370			July				Fresh material										Sphagnum jensenii	Sonicated, CH2Cl:MeOH			122.7	23	21-33			14.5	1/2 ((∑odd C21-C31)/(∑even C22-C32) + (∑odd C23-C31)/(∑even C22-C32))
Zhang et al., 2017	YC-2	China	48.5167	129.533	370			July				Litter										Sphagnum magellanicum	Sonicated, CH2Cl:MeOH			100.9	31	21-33			15.9	1/2 ((∑odd C21-C31)/(∑even C22-C32) + (∑odd C23-C31)/(∑even C22-C32))
Zhang et al., 2017	YC-3	China	48.5167	129.533	370			July				Fresh material										Sphagnum cuspidatulum	Sonicated, CH2Cl:MeOH			86.8	23	21-33			10.7	1/2 ((∑odd C21-C31)/(∑even C22-C32) + (∑odd C23-C31)/(∑even C22-C32))
Zhang et al., 2017	YC-3	China	48.5167	129.533	370			July				Litter										Sphagnum cuspidatulum	Sonicated, CH2Cl:MeOH			94.2	23	21-33			9.2	1/2 ((∑odd C21-C31)/(∑even C22-C32) + (∑odd C23-C31)/(∑even C22-C32))
Zhang et al., 2017	YC-4	China	48.5167	129.533	370			July				Fresh material										Sphagnum cuspidatulum	Sonicated, CH2Cl:MeOH			191	23	21-33			14.2	1/2 ((∑odd C21-C31)/(∑even C22-C32) + (∑odd C23-C31)/(∑even C22-C32))
Zhang et al., 2017	YC-4	China	48.5167	129.533	370			July				Litter										Sphagnum cuspidatulum	Sonicated, CH2Cl:MeOH			113.9	23	21-33			11.3	1/2 ((∑odd C21-C31)/(∑even C22-C32) + (∑odd C23-C31)/(∑even C22-C32))
Zhang et al., 2017	HN-1	China	42.2167	126.652	900	4	844					Fresh material										Sphagnum multifibrosum	Sonicated, CH2Cl:MeOH			79.3	25	21-33			17.4	1/2 ((∑odd C21-C31)/(∑even C22-C32) + (∑odd C23-C31)/(∑even C22-C32))
Zhang et al., 2017	HN-1	China	42.2167	126.652	900	4	844					Litter											Sonicated, CH2Cl:MeOH			35	29	21-33			6.1	1/2 ((∑odd C21-C31)/(∑even C22-C32) + (∑odd C23-C31)/(∑even C22-C32))
Zhang et al., 2017	HN-2	China	42.2167	126.652	900	4	844					Fresh material										Sphagnum acutifolioides	Sonicated, CH2Cl:MeOH			46.6	31	21-33			14.5	1/2 ((∑odd C21-C31)/(∑even C22-C32) + (∑odd C23-C31)/(∑even C22-C32))
Zhang et al., 2017	HN-2	China	42.2167	126.652	900	4	844					Litter											Sonicated, CH2Cl:MeOH			27.6	23	21-33			7.3	1/2 ((∑odd C21-C31)/(∑even C22-C32) + (∑odd C23-C31)/(∑even C22-C32))
Zhang et al., 2017	HN-3	China	42.2167	126.652	900	4	844					Fresh material										Sphagnum acutifolioides	Sonicated, CH2Cl:MeOH			37.9	23	21-33			10.5	1/2 ((∑odd C21-C31)/(∑even C22-C32) + (∑odd C23-C31)/(∑even C22-C32))
Zhang et al., 2017	HN-3	China	42.2167	126.652	900	4	844					Litter											Sonicated, CH2Cl:MeOH			32	23	21-33			5.7	1/2 ((∑odd C21-C31)/(∑even C22-C32) + (∑odd C23-C31)/(∑even C22-C32))
Zhang et al., 2017	DJH-1	China	31.4667	110	1700	7.2	1560	July				Fresh material										Sphagnum palustre	Sonicated, CH2Cl:MeOH			51.9	31	21-33			10	1/2 ((∑odd C21-C31)/(∑even C22-C32) + (∑odd C23-C31)/(∑even C22-C32))
Zhang et al., 2017	DJH-1	China	31.4667	110	1700	7.2	1560	July				Litter										Sphagnum palustre	Sonicated, CH2Cl:MeOH			47.4	31	21-33			6.7	1/2 ((∑odd C21-C31)/(∑even C22-C32) + (∑odd C23-C31)/(∑even C22-C32))
Zhang et al., 2017	DJH-2	China	31.4667	110	1700	7.2	1560	July				Fresh material										Sphagnum palustre	Sonicated, CH2Cl:MeOH			68.6	33	21-33			14.1	1/2 ((∑odd C21-C31)/(∑even C22-C32) + (∑odd C23-C31)/(∑even C22-C32))
Zhang et al., 2017	DJH-2	China	31.4667	110	1700	7.2	1560	July				Litter										Sphagnum palustre	Sonicated, CH2Cl:MeOH			57	33	21-33			8.4	1/2 ((∑odd C21-C31)/(∑even C22-C32) + (∑odd C23-C31)/(∑even C22-C32))
Zhang et al., 2017	DJH-3	China	31.4667	110	1700	7.2	1560	July				Fresh material										Sphagnum palustre	Sonicated, CH2Cl:MeOH			58.9	33	21-33			11	1/2 ((∑odd C21-C31)/(∑even C22-C32) + (∑odd C23-C31)/(∑even C22-C32))
Zhang et al., 2017	DJH-3	China	31.4667	110	1700	7.2	1560	July				Litter										Sphagnum palustre	Sonicated, CH2Cl:MeOH			64.1	31	21-33			7.6	1/2 ((∑odd C21-C31)/(∑even C22-C32) + (∑odd C23-C31)/(∑even C22-C32))
Zhang et al., 2017	DJH-4	China	31.4667	110	1700	7.2	1560	July				Fresh material										Sphagnum palustre	Sonicated, CH2Cl:MeOH			59.7	23	21-33			9.7	1/2 ((∑odd C21-C31)/(∑even C22-C32) + (∑odd C23-C31)/(∑even C22-C32))
Zhang et al., 2017	DJH-4	China	31.4667	110	1700	7.2	1560	July				Litter										Sphagnum palustre	Sonicated, CH2Cl:MeOH			27.6	31	21-33			5.2	1/2 ((∑odd C21-C31)/(∑even C22-C32) + (∑odd C23-C31)/(∑even C22-C32))
Zhang et al., 2017	DJH-5	China	31.4667	110	1700	7.2	1560	July				Fresh material										Sphagnum palustre	Sonicated, CH2Cl:MeOH			42.1	23	21-33			9.4	1/2 ((∑odd C21-C31)/(∑even C22-C32) + (∑odd C23-C31)/(∑even C22-C32))
Zhang et al., 2017	DJH-5	China	31.4667	110	1700	7.2	1560	July				Litter										Sphagnum compactum	Sonicated, CH2Cl:MeOH			98.7	29	21-33			5.5	1/2 ((∑odd C21-C31)/(∑even C22-C32) + (∑odd C23-C31)/(∑even C22-C32))
Zhang et al., 2017	SWGT-1	China	26.0833	110.367	1690	12.5	1800					Fresh material										Sphagnum magellanicum	Sonicated, CH2Cl:MeOH			15.6	25	21-33			10.4	1/2 ((∑odd C21-C31)/(∑even C22-C32) + (∑odd C23-C31)/(∑even C22-C32))
Zhang et al., 2017	SWGT-1	China	26.0833	110.367	1690	12.5	1800					Litter										Sphagnum multifibrosum	Sonicated, CH2Cl:MeOH			13.9	31	21-33			4.9	1/2 ((∑odd C21-C31)/(∑even C22-C32) + (∑odd C23-C31)/(∑even C22-C32))
Zhang et al., 2017	SWGT-2	China	26.0833	110.367	1690	12.5	1800					Fresh material										Sphagnum palustre	Sonicated, CH2Cl:MeOH			14.6	25	21-33			7	1/2 ((∑odd C21-C31)/(∑even C22-C32) + (∑odd C23-C31)/(∑even C22-C32))
Zhang et al., 2017	SWGT-2	China	26.0833	110.367	1690	12.5	1800					Litter										Sphagnum palustre	Sonicated, CH2Cl:MeOH			12.7	29	21-33			4	1/2 ((∑odd C21-C31)/(∑even C22-C32) + (∑odd C23-C31)/(∑even C22-C32))
Zhang et al., 2017	SWGT-3	China	26.0833	110.367	1690	12.5	1800					Fresh material										Sphagnum portoricense	Sonicated, CH2Cl:MeOH			12	25	21-33			13.2	1/2 ((∑odd C21-C31)/(∑even C22-C32) + (∑odd C23-C31)/(∑even C22-C32))
Zhang et al., 2017	SWGT-3	China	26.0833	110.367	1690	12.5	1800					Litter										Sphagnum multifibrosum	Sonicated, CH2Cl:MeOH			18.3	31	21-33			5.8	1/2 ((∑odd C21-C31)/(∑even C22-C32) + (∑odd C23-C31)/(∑even C22-C32))
[truncated: 24 more columns]

## Sheet: Litterbag_experiments
Site information								Sample information			Soil information								Litter information	n-alkanes data					Index measurements						Individual chain length concentration
Study	Sample or series	Location	Latitude	Longitude	Altitude (m)	MAAT (deg C)	MAP (mm)	Time (days)	Depth (m) top	Depth (m) bottom	Soil type	Soil pH	%Sand	%Silt	%Clay	C/N	% Total C	Total OC %	Plant species	Extraction method	Total concentration n-alkanes (ug g OC or C-1)	Total concentration n-alkanes (𝝻g g dry weight -1)	Cmax	Range of chain lengths	ACL	ACL equation	CPI	CPI equation	OEP	OEP equation	C23 (𝝻g g dry weight -1)	C24 (𝝻g g dry weight -1)	C25 (𝝻g g dry weight -1)	C26 (𝝻g g dry weight -1)	C27 (𝝻g g dry weight -1)	C28 (𝝻g g dry weight -1)	C29 (𝝻g g dry weight -1)	C30 (𝝻g g dry weight -1)	C31 (𝝻g g dry weight -1)	C32 (𝝻g g dry weight -1)	C33 (𝝻g g dry weight -1)	C34 (𝝻g g dry weight -1)	C35 (𝝻g g dry weight -1)
Huang et al., 1997		Moor House Nature Reserve, UK	54.6889	-2.36139	550	5.1	1880	0	0									47.2	Calluna vulgaris	Sonicated, MeOH:CH2Cl2		444.3	31	23-35	30.2	∑Ci x i/ ∑Ci , i=23-35	17	2 x ∑odd C25-C33/∑even C24-C32 + ∑even C26-C34			8.2	0.9	24.7	2	38.3	3.2	72.3	7.2	184.7	10.3	87.7	1.7	3.4
Huang et al., 1997		Moor House Nature Reserve (UK)	54.6889	-2.36139	550	5.1	1880	182.5	0									51.8	Calluna vulgaris	Sonicated, MeOH:CH2Cl2		367.2	31	23-35	30.6	∑Ci x i/ ∑Ci , i=23-35	16.8	2 x ∑odd C25-C33/∑even C24-C32 + ∑even C26-C34			3.7	0.6	13	1.2	21.5	2.2	55.8	5.9	165.4	9.7	83.4	1.6	3.2
Huang et al., 1997		Moor House Nature Reserve (UK)	54.6889	-2.36139	550	5.1	1880	2555	0									50	Calluna vulgaris	Sonicated, MeOH:CH2Cl2		81.2	31	23-35	30	∑Ci x i/ ∑Ci , i=23-35	8.6	2 x ∑odd C25-C33/∑even C24-C32 + ∑even C26-C34			0.9	0.5	4.7	1.1	8.1	1.7	15.4	2.2	28.9	2.4	13.3	0.8	1.1
Huang et al., 1997		Moor House Nature Reserve (UK)	54.6889	-2.36139	550	5.1	1880	8395	0									47.9	Calluna vulgaris	Sonicated, MeOH:CH2Cl2		26.3	31	23-35	29.3	∑Ci x i/ ∑Ci , i=23-35	16.9	2 x ∑odd C25-C33/∑even C24-C32 + ∑even C26-C34			0.6	0.3	2.8	0.3	3.8	0.4	5.6	0.3	8.3	0.3	3.5	0	0.2
Wang et al., 2014	Amaranthus retroflexus	Shangzhuang Experimental Station, China	39.8	116.467	40	13	480	0	0.05			8.13	32.4	55.2	12.5				Amaranthus retroflexus	Sonicated, DCM:MeOH				23-35	28.7	∑Ci x i/ ∑Ci	3.3	1/2 ((∑odd C25-C33)/(∑even C24-C32) + (∑odd C25-C33)/(∑even C26-C34))
Wang et al., 2014	Amaranthus retroflexus	Shangzhuang Experimental Station, China	39.8	116.467	40	13	480	30	0.05			8.13	32.4	55.2	12.5				Amaranthus retroflexus	Sonicated, DCM:MeOH				23-35	29	∑Ci x i/ ∑Ci	2.4	1/2 ((∑odd C25-C33)/(∑even C24-C32) + (∑odd C25-C33)/(∑even C26-C34))
Wang et al., 2014	Amaranthus retroflexus	Shangzhuang Experimental Station, China	39.8	116.467	40	13	480	60	0.05			8.13	32.4	55.2	12.5				Amaranthus retroflexus	Sonicated, DCM:MeOH				23-35	28.9	∑Ci x i/ ∑Ci	4.7	1/2 ((∑odd C25-C33)/(∑even C24-C32) + (∑odd C25-C33)/(∑even C26-C34))
Wang et al., 2014	Amaranthus retroflexus	Shangzhuang Experimental Station, China	39.8	116.467	40	13	480	90	0.05			8.13	32.4	55.2	12.5				Amaranthus retroflexus	Sonicated, DCM:MeOH				23-35	28.7	∑Ci x i/ ∑Ci	3.8	1/2 ((∑odd C25-C33)/(∑even C24-C32) + (∑odd C25-C33)/(∑even C26-C34))
Wang et al., 2014	Amaranthus retroflexus	Shangzhuang Experimental Station, China	39.8	116.467	40	13	480	120	0.05			8.13	32.4	55.2	12.5				Amaranthus retroflexus	Sonicated, DCM:MeOH				23-35	28.7	∑Ci x i/ ∑Ci	3.6	1/2 ((∑odd C25-C33)/(∑even C24-C32) + (∑odd C25-C33)/(∑even C26-C34))
Wang et al., 2014	Amaranthus retroflexus	Shangzhuang Experimental Station, China	39.8	116.467	40	13	480	150	0.05			8.13	32.4	55.2	12.5				Amaranthus retroflexus	Sonicated, DCM:MeOH				23-35	28.8	∑Ci x i/ ∑Ci	1.5	1/2 ((∑odd C25-C33)/(∑even C24-C32) + (∑odd C25-C33)/(∑even C26-C34))
Wang et al., 2014	Amaranthus retroflexus	Shangzhuang Experimental Station, China	39.8	116.467	40	13	480	180	0.05			8.13	32.4	55.2	12.5				Amaranthus retroflexus	Sonicated, DCM:MeOH				23-35	28.6	∑Ci x i/ ∑Ci	1.8	1/2 ((∑odd C25-C33)/(∑even C24-C32) + (∑odd C25-C33)/(∑even C26-C34))
Wang et al., 2014	Amaranthus retroflexus	Shangzhuang Experimental Station, China	39.8	116.467	40	13	480	210	0.05			8.13	32.4	55.2	12.5				Amaranthus retroflexus	Sonicated, DCM:MeOH				23-35	28.8	∑Ci x i/ ∑Ci	1.4	1/2 ((∑odd C25-C33)/(∑even C24-C32) + (∑odd C25-C33)/(∑even C26-C34))
Wang et al., 2014	Setaria viridis	Shangzhuang Experimental Station, China	39.8	116.467	40	13	480	0	0.05			8.13	32.4	55.2	12.5				Setaria viridis	Sonicated, DCM:MeOH				23-35	29.8	∑Ci x i/ ∑Ci	8.1	1/2 ((∑odd C25-C33)/(∑even C24-C32) + (∑odd C25-C33)/(∑even C26-C34))
Wang et al., 2014	Setaria viridis	Shangzhuang Experimental Station, China	39.8	116.467	40	13	480	30	0.05			8.13	32.4	55.2	12.5				Setaria viridis	Sonicated, DCM:MeOH				23-35	31.4	∑Ci x i/ ∑Ci	8.6	1/2 ((∑odd C25-C33)/(∑even C24-C32) + (∑odd C25-C33)/(∑even C26-C34))
Wang et al., 2014	Setaria viridis	Shangzhuang Experimental Station, China	39.8	116.467	40	13	480	60	0.05			8.13	32.4	55.2	12.5				Setaria viridis	Sonicated, DCM:MeOH				23-35	30.7	∑Ci x i/ ∑Ci	8.3	1/2 ((∑odd C25-C33)/(∑even C24-C32) + (∑odd C25-C33)/(∑even C26-C34))
Wang et al., 2014	Setaria viridis	Shangzhuang Experimental Station, China	39.8	116.467	40	13	480	90	0.05			8.13	32.4	55.2	12.5				Setaria viridis	Sonicated, DCM:MeOH				23-35	30.6	∑Ci x i/ ∑Ci	9.3	1/2 ((∑odd C25-C33)/(∑even C24-C32) + (∑odd C25-C33)/(∑even C26-C34))
Wang et al., 2014	Setaria viridis	Shangzhuang Experimental Station, China	39.8	116.467	40	13	480	120	0.05			8.13	32.4	55.2	12.5				Setaria viridis	Sonicated, DCM:MeOH				23-35	30.6	∑Ci x i/ ∑Ci	9.2	1/2 ((∑odd C25-C33)/(∑even C24-C32) + (∑odd C25-C33)/(∑even C26-C34))
Wang et al., 2014	Setaria viridis	Shangzhuang Experimental Station, China	39.8	116.467	40	13	480	150	0.05			8.13	32.4	55.2	12.5				Setaria viridis	Sonicated, DCM:MeOH				23-35	31.3	∑Ci x i/ ∑Ci	8.7	1/2 ((∑odd C25-C33)/(∑even C24-C32) + (∑odd C25-C33)/(∑even C26-C34))
Wang et al., 2014	Setaria viridis	Shangzhuang Experimental Station, China	39.8	116.467	40	13	480	180	0.05			8.13	32.4	55.2	12.5				Setaria viridis	Sonicated, DCM:MeOH				23-35	31.3	∑Ci x i/ ∑Ci	7.5	1/2 ((∑odd C25-C33)/(∑even C24-C32) + (∑odd C25-C33)/(∑even C26-C34))
Wang et al., 2014	Setaria viridis	Shangzhuang Experimental Station, China	39.8	116.467	40	13	480	210	0.05			8.13	32.4	55.2	12.5				Setaria viridis	Sonicated, DCM:MeOH				23-35	31.4	∑Ci x i/ ∑Ci	8.9	1/2 ((∑odd C25-C33)/(∑even C24-C32) + (∑odd C25-C33)/(∑even C26-C34))
Wang et al., 2014	Eleusine indica	Shangzhuang Experimental Station, China	39.8	116.467	40	13	480	0	0.05			8.13	32.4	55.2	12.5				Eleusine indica	Sonicated, DCM:MeOH				23-35	29.8	∑Ci x i/ ∑Ci	10.2	1/2 ((∑odd C25-C33)/(∑even C24-C32) + (∑odd C25-C33)/(∑even C26-C34))
Wang et al., 2014	Eleusine indica	Shangzhuang Experimental Station, China	39.8	116.467	40	13	480	30	0.05			8.13	32.4	55.2	12.5				Eleusine indica	Sonicated, DCM:MeOH				23-35	29.9	∑Ci x i/ ∑Ci	10.3	1/2 ((∑odd C25-C33)/(∑even C24-C32) + (∑odd C25-C33)/(∑even C26-C34))
Wang et al., 2014	Eleusine indica	Shangzhuang Experimental Station, China	39.8	116.467	40	13	480	60	0.05			8.13	32.4	55.2	12.5				Eleusine indica	Sonicated, DCM:MeOH				23-35	29.4	∑Ci x i/ ∑Ci	10.5	1/2 ((∑odd C25-C33)/(∑even C24-C32) + (∑odd C25-C33)/(∑even C26-C34))
Wang et al., 2014	Eleusine indica	Shangzhuang Experimental Station, China	39.8	116.467	40	13	480	90	0.05			8.13	32.4	55.2	12.5				Eleusine indica	Sonicated, DCM:MeOH				23-35	29.5	∑Ci x i/ ∑Ci	10.7	1/2 ((∑odd C25-C33)/(∑even C24-C32) + (∑odd C25-C33)/(∑even C26-C34))
Wang et al., 2014	Eleusine indica	Shangzhuang Experimental Station, China	39.8	116.467	40	13	480	120	0.05			8.13	32.4	55.2	12.5				Eleusine indica	Sonicated, DCM:MeOH				23-35	29.3	∑Ci x i/ ∑Ci	10.7	1/2 ((∑odd C25-C33)/(∑even C24-C32) + (∑odd C25-C33)/(∑even C26-C34))
Wang et al., 2014	Eleusine indica	Shangzhuang Experimental Station, China	39.8	116.467	40	13	480	150	0.05			8.13	32.4	55.2	12.5				Eleusine indica	Sonicated, DCM:MeOH				23-35	30.1	∑Ci x i/ ∑Ci	9.2	1/2 ((∑odd C25-C33)/(∑even C24-C32) + (∑odd C25-C33)/(∑even C26-C34))
Wang et al., 2014	Eleusine indica	Shangzhuang Experimental Station, China	39.8	116.467	40	13	480	180	0.05			8.13	32.4	55.2	12.5				Eleusine indica	Sonicated, DCM:MeOH				23-35	30.6	∑Ci x i/ ∑Ci	10.5	1/2 ((∑odd C25-C33)/(∑even C24-C32) + (∑odd C25-C33)/(∑even C26-C34))
Wang et al., 2014	Eleusine indica	Shangzhuang Experimental Station, China	39.8	116.467	40	13	480	210	0.05			8.13	32.4	55.2	12.5				Eleusine indica	Sonicated, DCM:MeOH				23-35		∑Ci x i/ ∑Ci	10.5	1/2 ((∑odd C25-C33)/(∑even C24-C32) + (∑odd C25-C33)/(∑even C26-C34))
Wang et al., 2014	Erigeron speciosus	Shangzhuang Experimental Station, China	39.8	116.467	40	13	480	0	0.05			8.13	32.4	55.2	12.5				Erigeron speciosus	Sonicated, DCM:MeOH				23-35	30.7	∑Ci x i/ ∑Ci	9.7	1/2 ((∑odd C25-C33)/(∑even C24-C32) + (∑odd C25-C33)/(∑even C26-C34))
Wang et al., 2014	Erigeron speciosus	Shangzhuang Experimental Station, China	39.8	116.467	40	13	480	30	0.05			8.13	32.4	55.2	12.5				Erigeron speciosus	Sonicated, DCM:MeOH				23-35	30.8	∑Ci x i/ ∑Ci	9.1	1/2 ((∑odd C25-C33)/(∑even C24-C32) + (∑odd C25-C33)/(∑even C26-C34))
Wang et al., 2014	Erigeron speciosus	Shangzhuang Experimental Station, China	39.8	116.467	40	13	480	60	0.05			8.13	32.4	55.2	12.5				Erigeron speciosus	Sonicated, DCM:MeOH				23-35	30.7	∑Ci x i/ ∑Ci	9.2	1/2 ((∑odd C25-C33)/(∑even C24-C32) + (∑odd C25-C33)/(∑even C26-C34))
Wang et al., 2014	Erigeron speciosus	Shangzhuang Experimental Station, China	39.8	116.467	40	13	480	90	0.05			8.13	32.4	55.2	12.5				Erigeron speciosus	Sonicated, DCM:MeOH				23-35	30.7	∑Ci x i/ ∑Ci	8	1/2 ((∑odd C25-C33)/(∑even C24-C32) + (∑odd C25-C33)/(∑even C26-C34))
Wang et al., 2014	Erigeron speciosus	Shangzhuang Experimental Station, China	39.8	116.467	40	13	480	120	0.05			8.13	32.4	55.2	12.5				Erigeron speciosus	Sonicated, DCM:MeOH				23-35	30.6	∑Ci x i/ ∑Ci	9.2	1/2 ((∑odd C25-C33)/(∑even C24-C32) + (∑odd C25-C33)/(∑even C26-C34))
Wang et al., 2014	Erigeron speciosus	Shangzhuang Experimental Station, China	39.8	116.467	40	13	480	150	0.05			8.13	32.4	55.2	12.5				Erigeron speciosus	Sonicated, DCM:MeOH				23-35	30.9	∑Ci x i/ ∑Ci	9.2	1/2 ((∑odd C25-C33)/(∑even C24-C32) + (∑odd C25-C33)/(∑even C26-C34))
Wang et al., 2014	Erigeron speciosus	Shangzhuang Experimental Station, China	39.8	116.467	40	13	480	180	0.05			8.13	32.4	55.2	12.5				Erigeron speciosus	Sonicated, DCM:MeOH				23-35	31	∑Ci x i/ ∑Ci	9.7	1/2 ((∑odd C25-C33)/(∑even C24-C32) + (∑odd C25-C33)/(∑even C26-C34))
Li et al., 2017	Neosinocalanus affinis, 5 cm depth	Wuhan, China	30.5164	114.403	-	16 - 17.5	1270	0	0			6.5-7.0							Neosinocalanus affinis	Sonicated, DCM:MeOH		1497	27	23-33	27.7	∑Ci x i/ ∑Ci , i=23-35	12.7	2 x ∑odd C23-C35/∑even C22-C34 + ∑even C24-C36
Li et al., 2017	Neosinocalanus affinis, 5 cm depth	Wuhan, China	30.5164	114.403	-	16 - 17.5	1270	74	0.05			6.5-7.0							Neosinocalanus affinis	Sonicated, DCM:MeOH		608	27	23-33	27.8	∑Ci x i/ ∑Ci , i=23-35	5.6	2 x ∑odd C23-C35/∑even C22-C34 + ∑even C24-C36
Li et al., 2017	Neosinocalanus affinis, 5 cm depth	Wuhan, China	30.5164	114.403	-	16 - 17.5	1270	114	0.05			6.5-7.0							Neosinocalanus affinis	Sonicated, DCM:MeOH		85	29	23-33	28.7	∑Ci x i/ ∑Ci , i=23-35	6.1	2 x ∑odd C23-C35/∑even C22-C34 + ∑even C24-C36
Li et al., 2017	Neosinocalanus affinis, 5 cm depth	Wuhan, China	30.5164	114.403	-	16 - 17.5	1270	157	0.05			6.5-7.0							Neosinocalanus affinis	Sonicated, DCM:MeOH		122	29	23-33	28.7	∑Ci x i/ ∑Ci , i=23-35	5.8	2 x ∑odd C23-C35/∑even C22-C34 + ∑even C24-C36
Li et al., 2017	Neosinocalanus affinis, 5 cm depth	Wuhan, China	30.5164	114.403	-	16 - 17.5	1270	380	0.05			6.5-7.0							Neosinocalanus affinis	Sonicated, DCM:MeOH		85	29	23-33	29.1	∑Ci x i/ ∑Ci , i=23-35	6.8	2 x ∑odd C23-C35/∑even C22-C34 + ∑even C24-C36
Li et al., 2017	Neosinocalanus affinis, 15 cm depth	Wuhan, China	30.5164	114.403	-	16 - 17.5	1270	0	0			6.5-7.0							Neosinocalanus affinis	Sonicated, DCM:MeOH		1497	27	23-33	27.7	∑Ci x i/ ∑Ci , i=23-35	12.7	2 x ∑odd C23-C35/∑even C22-C34 + ∑even C24-C36
Li et al., 2017	Neosinocalanus affinis, 15 cm depth	Wuhan, China	30.5164	114.403	-	16 - 17.5	1270	74	0.15			6.5-7.0							Neosinocalanus affinis	Sonicated, DCM:MeOH		119	29	23-33	28.6	∑Ci x i/ ∑Ci , i=23-35	5.1	2 x ∑odd C23-C35/∑even C22-C34 + ∑even C24-C36
Li et al., 2017	Neosinocalanus affinis, 15 cm depth	Wuhan, China	30.5164	114.403	-	16 - 17.5	1270	114	0.15			6.5-7.0							Neosinocalanus affinis	Sonicated, DCM:MeOH		93	29	23-33	28.6	∑Ci x i/ ∑Ci , i=23-35	5.9	2 x ∑odd C23-C35/∑even C22-C34 + ∑even C24-C36
Li et al., 2017	Neosinocalanus affinis, 15 cm depth	Wuhan, China	30.5164	114.403	-	16 - 17.5	1270	157	0.15			6.5-7.0							Neosinocalanus affinis	Sonicated, DCM:MeOH		119	29	23-33	28.8	∑Ci x i/ ∑Ci , i=23-35	5.4	2 x ∑odd C23-C35/∑even C22-C34 + ∑even C24-C36
Li et al., 2017	Neosinocalanus affinis, 15 cm depth	Wuhan, China	30.5164	114.403	-	16 - 17.5	1270	380	0.15			6.5-7.0							Neosinocalanus affinis	Sonicated, DCM:MeOH		148	29	23-33	28.9	∑Ci x i/ ∑Ci , i=23-35	6.7	2 x ∑odd C23-C35/∑even C22-C34 + ∑even C24-C36
Li et al., 2017	Neosinocalanus affinis, 35 cm depth	Wuhan, China	30.5164	114.403	-	16 - 17.5	1270	0	0			6.5-7.0							Neosinocalanus affinis	Sonicated, DCM:MeOH		1497	27	23-33	27.7	∑Ci x i/ ∑Ci , i=23-35	12.7	2 x ∑odd C23-C35/∑even C22-C34 + ∑even C24-C36
Li et al., 2017	Neosinocalanus affinis, 35 cm depth	Wuhan, China	30.5164	114.403	-	16 - 17.5	1270	74	0.35			6.5-7.0							Neosinocalanus affinis	Sonicated, DCM:MeOH		139	29	23-33	28.4	∑Ci x i/ ∑Ci , i=23-35	6.2	2 x ∑odd C23-C35/∑even C22-C34 + ∑even C24-C36
Li et al., 2017	Neosinocalanus affinis, 35 cm depth	Wuhan, China	30.5164	114.403	-	16 - 17.5	1270	114	0.35			6.5-7.0							Neosinocalanus affinis	Sonicated, DCM:MeOH		115	29	23-33	28.6	∑Ci x i/ ∑Ci , i=23-35	6.2	2 x ∑odd C23-C35/∑even C22-C34 + ∑even C24-C36
Li et al., 2017	Neosinocalanus affinis, 35 cm depth	Wuhan, China	30.5164	114.403	-	16 - 17.5	1270	157	0.35			6.5-7.0							Neosinocalanus affinis	Sonicated, DCM:MeOH		132	29	23-33	28.8	∑Ci x i/ ∑Ci , i=23-35	6.9	2 x ∑odd C23-C35/∑even C22-C34 + ∑even C24-C36
Li et al., 2017	Neosinocalanus affinis, 35 cm depth	Wuhan, China	30.5164	114.403	-	16 - 17.5	1270	380	0.35			6.5-7.0							Neosinocalanus affinis	Sonicated, DCM:MeOH		103	29	23-33	28.9	∑Ci x i/ ∑Ci , i=23-35	7.2	2 x ∑odd C23-C35/∑even C22-C34 + ∑even C24-C36
Li et al., 2017	Osmanthus fragrans	Guilin, China	25.2814	110.316	-	18.8	1874	0	0			5.5-6.0							Osmanthus fragrans	Sonicated, DCM:MeOH		202	31	23-33	30.9	∑Ci x i/ ∑Ci , i=23-35	4.7	2 x ∑odd C23-C35/∑even C22-C34 + ∑even C24-C36
Li et al., 2017	Osmanthus fragrans	Guilin, China	25.2814	110.316	-	18.8	1874	69	0.05			5.5-6.0							Osmanthus fragrans	Sonicated, DCM:MeOH		149	31	23-33	31	∑Ci x i/ ∑Ci , i=23-35	4.2	2 x ∑odd C23-C35/∑even C22-C34 + ∑even C24-C36
Li et al., 2017	Osmanthus fragrans	Guilin, China	25.2814	110.316	-	18.8	1874	156	0.05			5.5-6.0							Osmanthus fragrans	Sonicated, DCM:MeOH		100	31	23-33	31.1	∑Ci x i/ ∑Ci , i=23-35	4.5	2 x ∑odd C23-C35/∑even C22-C34 + ∑even C24-C36
Li et al., 2017	Osmanthus fragrans	Guilin, China	25.2814	110.316	-	18.8	1874	227	0.05			5.5-6.0							Osmanthus fragrans	Sonicated, DCM:MeOH		103	31	23-33	30.9	∑Ci x i/ ∑Ci , i=23-35	4.3	2 x ∑odd C23-C35/∑even C22-C34 + ∑even C24-C36
Li et al., 2017	Osmanthus fragrans	Guilin, China	25.2814	110.316	-	18.8	1874	288	0.05			5.5-6.0							Osmanthus fragrans	Sonicated, DCM:MeOH		86	31	23-33	30.8	∑Ci x i/ ∑Ci , i=23-35	3.1	2 x ∑odd C23-C35/∑even C22-C34 + ∑even C24-C36
Li et al., 2017	Osmanthus fragrans	Guilin, China	25.2814	110.316	-	18.8	1874	369	0.05			5.5-6.0							Osmanthus fragrans	Sonicated, DCM:MeOH		94	31	23-33	31	∑Ci x i/ ∑Ci , i=23-35	3.9	2 x ∑odd C23-C35/∑even C22-C34 + ∑even C24-C36
Schulz et al., 2012	Zea mays, sandy soil					14		0	0			6	55.2	31.4	13.4				Zea mays	Shaker, hexane		183.4
Schulz et al., 2012	Zea mays, sandy soil					14		14	0			6	55.2	31.4	13.4				Zea mays	Shaker, hexane		29.9
Schulz et al., 2012	Zea mays, sandy soil					14		56	0			6	55.2	31.4	13.4				Zea mays	Shaker, hexane		26.3
Schulz et al., 2012	Zea mays, sandy soil					14		210	0			6	55.2	31.4	13.4				Zea mays	Shaker, hexane		25.4
Schulz et al., 2012	Zea mays, silty soil					14		0	0			6	18	60.6	21.4				Zea mays	Shaker, hexane		183.4
Schulz et al., 2012	Zea mays, silty soil					14		14	0			6	18	60.6	21.4				Zea mays	Shaker, hexane		169.3
Schulz et al., 2012	Zea mays, silty soil					14		56	0			6	18	60.6	21.4				Zea mays	Shaker, hexane		36.4
Schulz et al., 2012	Zea mays, silty soil					14		210	0			6	18	60.6	21.4				Zea mays	Shaker, hexane		56.6
Schulz et al., 2012	Pisum sativum, sandy soil					14		0	0			6	55.2	31.4	13.4				Pisum sativum	Shaker, hexane		6544.8
Schulz et al., 2012	Pisum sativum, sandy soil					14		14	0			6	55.2	31.4	13.4				Pisum sativum	Shaker, hexane		7524.3
Schulz et al., 2012	Pisum sativum, sandy soil					14		56	0			6	55.2	31.4	13.4				Pisum sativum	Shaker, hexane		881.3
Schulz et al., 2012	Pisum sativum, sandy soil					14		210	0			6	55.2	31.4	13.4				Pisum sativum	Shaker, hexane		2111.4
Schulz et al., 2012	Pisum sativum, silty soil					14		0	0			6	18	60.6	21.4				Pisum sativum	Shaker, hexane		6544.8
Schulz et al., 2012	Pisum sativum, silty soil					14		14	0			6	18	60.6	21.4				Pisum sativum	Shaker, hexane		6021
Schulz et al., 2012	Pisum sativum, silty soil					14		56	0			6	18	60.6	21.4				Pisum sativum	Shaker, hexane		3705.9
Schulz et al., 2012	Pisum sativum, silty soil					14		210	0			6	18	60.6	21.4				Pisum sativum	Shaker, hexane		1428.5
Nguyen Tu et al., 2017		“Breuil-Chenue” experimental forest site, France	47.3028	4.06778	650	9	1280	0	0		Dystric cambisol	4-4.5							Fagus sylvatica	Sonicated, MeOH:CH2Cl2			27	12-33	26.4	∑Ci x i/ ∑Ci	9.9	∑ odd C17-C33/∑ even C16-C32
Nguyen Tu et al., 2017		“Breuil-Chenue” experimental forest site, France	47.3028	4.06778	650	9	1280	903	0		Dystric cambisol	4-4.5							Fagus sylvatica	Sonicated, MeOH:CH2Cl2			27	12-33	26.9	∑Ci x i/ ∑Ci	14.7	∑ odd C17-C33/∑ even C16-C32
Zech et al., 2011	Acer pseudoplatanus	Fichtelgebirge, Germany	50.1431	11.8694	780	5	1100	0	0										Acer pseudoplatanus	ASE, MeOH:toluene		228		20-35
Zech et al., 2011	Acer pseudoplatanus	Fichtelgebirge, Germany	50.1431	11.8694	780	5	1100	810	0										Acer pseudoplatanus	ASE, MeOH:toluene		85		20-35
Zech et al., 2011	Fagus sylvatica	Fichtelgebirge, Germany	50.1431	11.8694	780	5	1100	0	0										Fagus sylvatica	ASE, MeOH:toluene		371		20-35
Zech et al., 2011	Fagus sylvatica	Fichtelgebirge, Germany	50.1431	11.8694	780	5	1100	810	0										Fagus sylvatica	ASE, MeOH:toluene		85		20-35
Zech et al., 2011	Sorbus aucuparia	Fichtelgebirge, Germany	50.1431	11.8694	780	5	1100	0	0										Sorbus aucuparia	ASE, MeOH:toluene		398		20-35
Zech et al., 2011	Sorbus aucuparia	Fichtelgebirge, Germany	50.1431	11.8694	780	5	1100	810	0										Sorbus aucuparia	ASE, MeOH:toluene		125		20-35
