# Supplementary material for: Transformation of n -alkanes from plant to soil: a review
Source: Copernicus journal article supplement (doi:10.5194/soil-7-785-2021), 2021-11-25
Supplement: Supplementary file [file soil-7-785-2021-supplement-title-page.pdf › soil-7-785-2021-supplement-title-page.pdf]

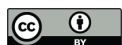

*Supplement of*

## **Transformation of *n*-alkanes from plant to soil: a review**

**Carrie L. Thomas et al.**

*Correspondence to:* Carrie L. Thomas ([carrie.thomas@geo.uzh.ch](mailto:carrie.thomas@geo.uzh.ch))

- [soil-7-785-2021-supplement-title-page.pdf](#)
- [supplementary\\_material\\_cthomas.xlsx](#)

The copyright of individual parts of the supplement might differ from the article licence.
